# Supplementary material for: Functional and transcriptional profiling of microglial activation during the chronic phase of TBI identifies an age-related driver of poor outcome in old mice
Source: PubMed Central journal article supplement (PMC9213636; doi:10.1007/s11357-022-00562-y), 2022-04-22
Supplement: 11357_2022_562_MOESM1_ESM.pdf [file 11357_2022_562_MOESM1_ESM.pdf]

# **Functional and transcriptional profiling of microglial activation during the chronic phase of TBI identifies an age-related driver of poor outcome in old mice**

Rodney M. Ritzel, Yun Li, Zhuofan Lei, Jordan Carter, Junyun He, Harry M.C. Choi, Niaz Khan, Hui Li, Samantha Allen, Marta M. Lipinski, Alan I. Faden, Junfang Wu\*

Department of Anesthesiology and Shock, Trauma and Anesthesiology Research Center, University of Maryland School of Medicine, Baltimore, Maryland 21201, USA

## **Supplementary Material**

**Supplementary figures (S1-S7) and tables (S1-S3).**

### **Supplementary Figure legends (S1-S7)**

**Supplementary Figure S1. Temporal gait dynamics in young and old mice after TBI.** Catwalk gait analysis of right hind, left front, and left hind limbs is shown for the following parameters: **(A)** Stand (s), **(B)** Swing (s), **(C)** Swing Speed (cm/s), **(D)** Stride Length (cm), **(E)** Step Cycle (s), **(F)** Duty Cycle (%), **(G)** Body Speed (cm/s), and **(H)** Body Speed Variation (%). N=19 (Young TBI), and 17 (Old TBI). Data were analyzed using 2-way ANOVA group analysis with Tukey's test for multiple comparisons. \*\*\*p<0.001, \*\*p< 0.01, \*p<0.05.

**Supplementary Figure S2. Differential expression analysis of transcription counts in cerebral cortex and hippocampus after TBI.** **(A-B)** Pairwise group comparisons of differential gene expression were carried out with the nSolver Analysis program (p-value < 0.05). Four pairwise comparisons were performed for both cortical and hippocampus tissues: (1) Old Sham vs. Young Sham (*Set 1*); (2) Young TBI vs. Young Sham (*Set 2*); (3) Old TBI vs. Old Sham (*Set 3*); (4) Old TBI vs. Young TBI (*Set 4*). **(C-D)** Venn diagram of differential expressed genes demonstrates the separation of injury- and age-related genes based on their membership in *Set 1* and *4* or *Set 2* and *3*. N=6 mice/group.

**Supplementary Figure S3. qPCR validation of Nanostring data for the cortex at 16w after TBI.** Gene expression changes in the cerebral cortex were validated for NanoString target genes related to the **(A)** complement pathway, **(B)** immune pathways, **(C)** autophagy and endocytosis pathways, **(D)** epigenetic regulation, and **(E)** neuronal activity. N=6-7/group. Data were analyzed

using 2-way ANOVA group analysis with Tukey's test for multiple comparisons. \*\*\*\*p<0.0001, \*\*\*p<0.001, \*\*p<0.01, \*p<0.05.

**Supplementary Figure S4. qPCR validation of Nanostring data for the hippocampus at 16w after TBI.** Gene expression changes in the hippocampus were validated for NanoString target genes related to the (A) complement pathway, (B) immune pathways, (C) autophagy and endocytosis pathways, (D) epigenetic regulation, (E) endothelial regulation, and (F) neuronal activity. N=6-7/group. Data were analyzed using two-way ANOVA group analysis with Tukey's test for multiple comparisons. \*\*\*\*p<0.0001, \*\*\*p<0.001, \*\*p<0.01, \*p<0.05.

**Supplementary Figure S5. Temporal alterations in microglial lipofuscin content after TBI.** Representative histograms depict the relative (A) forward and (B) side light scatter intensities of microglia at 48h and 16w post-TBI. The mean fluorescence intensity of (C) BODIPY<sup>493/503</sup>- and (D) FerroOrange-stained microglia is quantified. Representative histograms illustrate the relative level of (E) cytosolic protein aggregation and (F) autofluorescence in the empty PE channel. For all histograms, gray = FMO control, blue = young, red = old, Sham = no outline/no fill, 48h TBI = bold outline/no fill, and 12w TBI = bold outline/bold fill. N=5-7/group. Data were analyzed using two-way ANOVA group analysis with Tukey's test for multiple comparisons. \*\*\*p<0.001, \*\*p<0.01, \*p<0.05.

**Supplementary Figure S6. Effects of trehalose treatment on cognitive and social behavior.** (A) Y-maze experiment showed a significant decrease of arm entry number at 1w post-injury in both age groups. (B) NOR task showed no group differences in exploration time of left versus right objects during the sample phase. (C-D) Graphs depicting the preference index of each sequence for the social recognition experiment. In sequence 3, The TBI sucrose group failed to show preference for the second, novel stranger mouse, which suggests neurological deficits in social interaction. \*\*\*\*p<0.0001, \*\*\*p<0.001, \*\*p<0.01, \*p<0.05.

**Supplementary Figure S7. Effects of trehalose treatment on microglial function.** Representative histograms depict the relative abundance of (A) lysosomal content, and protein expression of (B) Lamp1, (C) Lamp2, and (D) Sqstm1/p62. No differences were seen between groups. (E) A significant effect of Trehalose treatment was seen in the frequency of lysine acetylated microglia. For all histograms, gray = FMO control, Sucrose (vehicle) treated = Blue, Trehalose treated = Red, Sham controls = no fill, and TBI groups = bold fill. N=9-10/group (A-C) and N=4-6/group (D). Data were analyzed using 2-way ANOVA group analysis with Tukey's test for multiple comparisons. \*\*\*p<0.001.

Fig S1

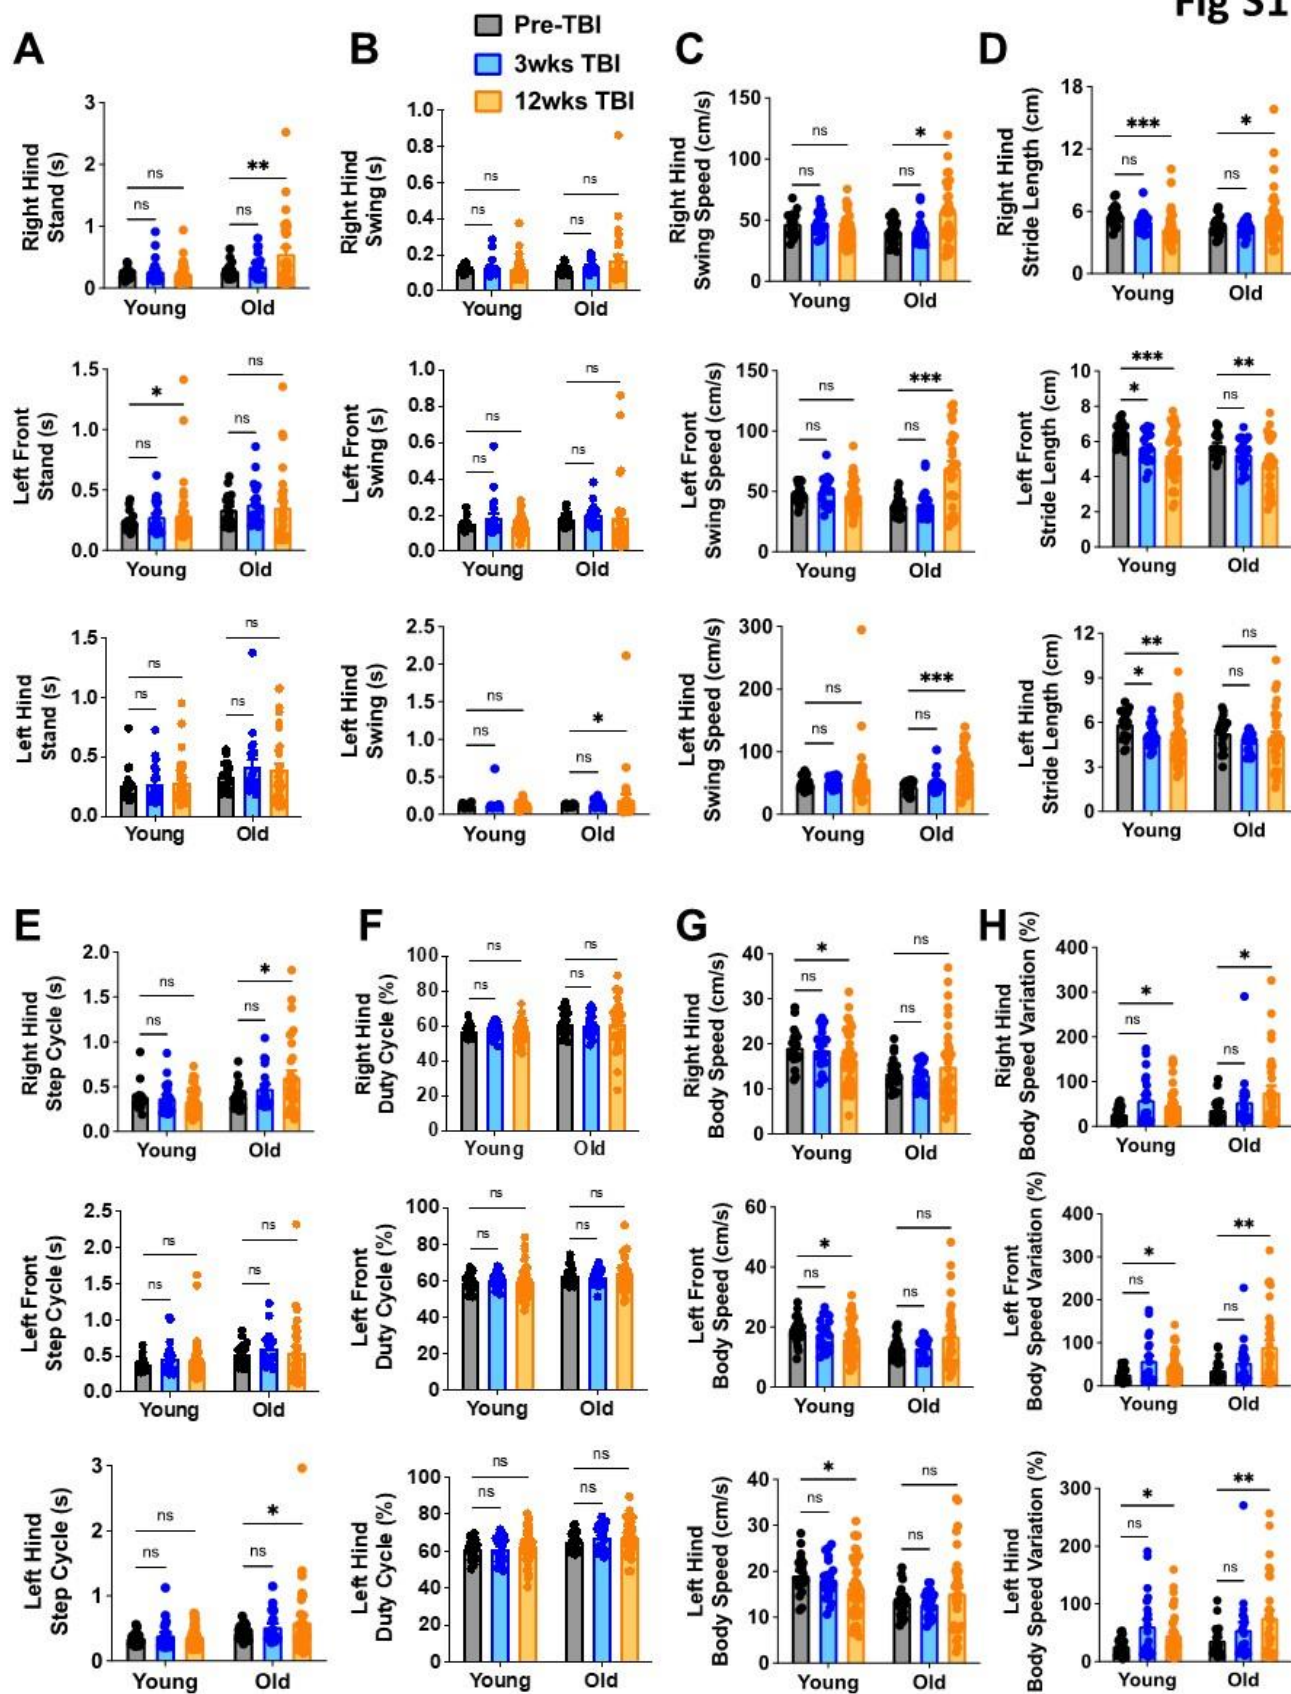

**Fig S2**

**A Cortex**  
Differential Expression (DE) Analysis

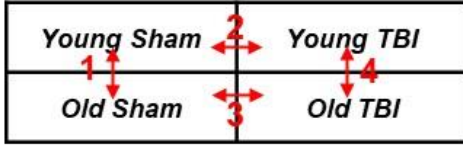

| Pairwise Comparison | DE Genes<br>↓<br>Expression | DE Genes<br>↑<br>Expression |
|---------------------|-----------------------------|-----------------------------|
| <b>Set 1</b>        | 59                          | 71                          |
| <b>Set 2</b>        | 101                         | 23                          |
| <b>Set 3</b>        | 225                         | 28                          |
| <b>Set 4</b>        | 149                         | 29                          |

**B Hippocampus**  
Differential Expression (DE) Analysis

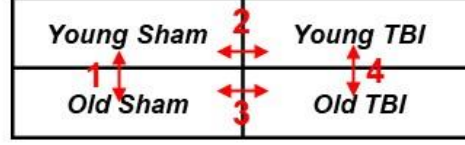

| Pairwise Comparison | DE Genes<br>↓<br>Expression | DE Genes<br>↑<br>Expression |
|---------------------|-----------------------------|-----------------------------|
| <b>Set 1</b>        | 74                          | 47                          |
| <b>Set 2</b>        | 126                         | 21                          |
| <b>Set 3</b>        | 83                          | 27                          |
| <b>Set 4</b>        | 64                          | 77                          |

**C Cortex**

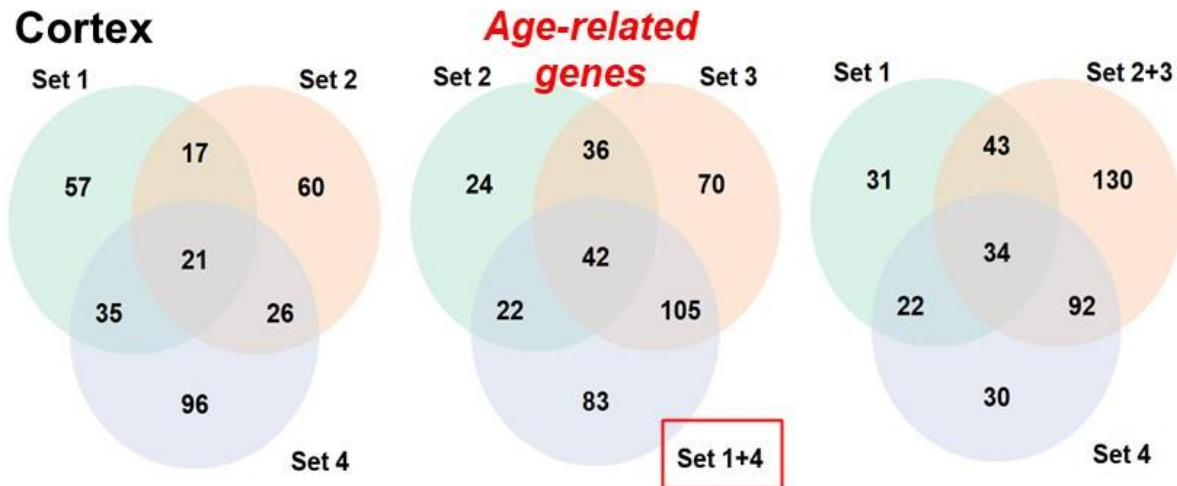

**D Hippocampus**

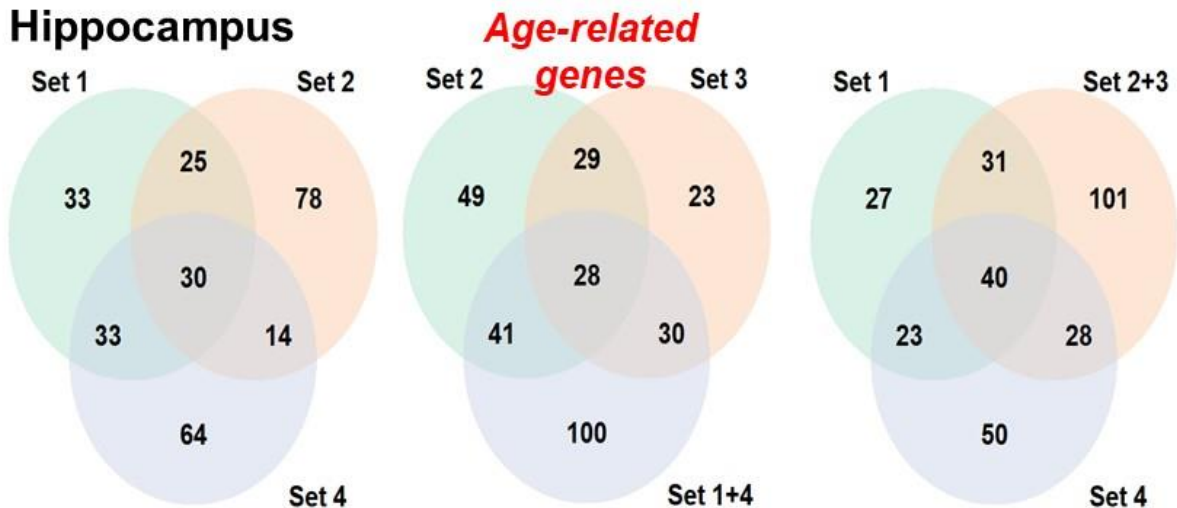

**Fig S3**

**A Complement Pathway**

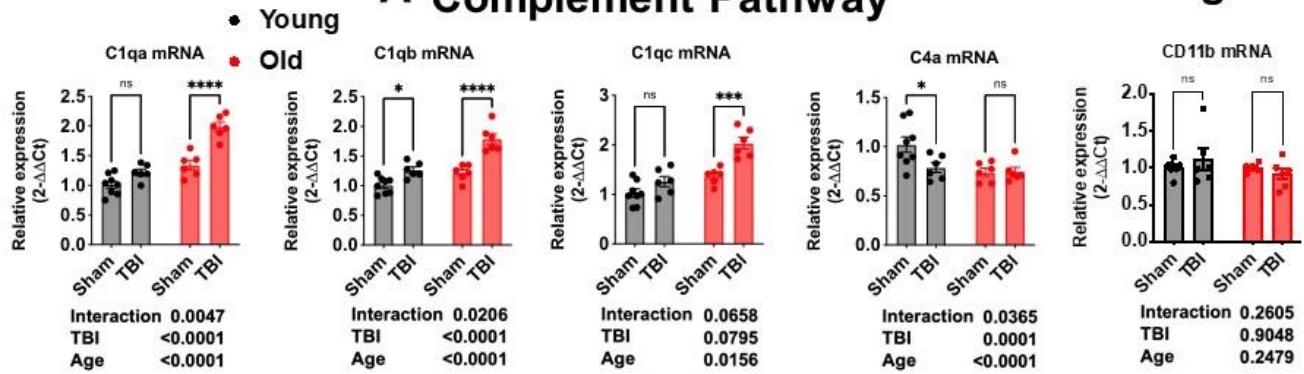

**B Immune Pathways**

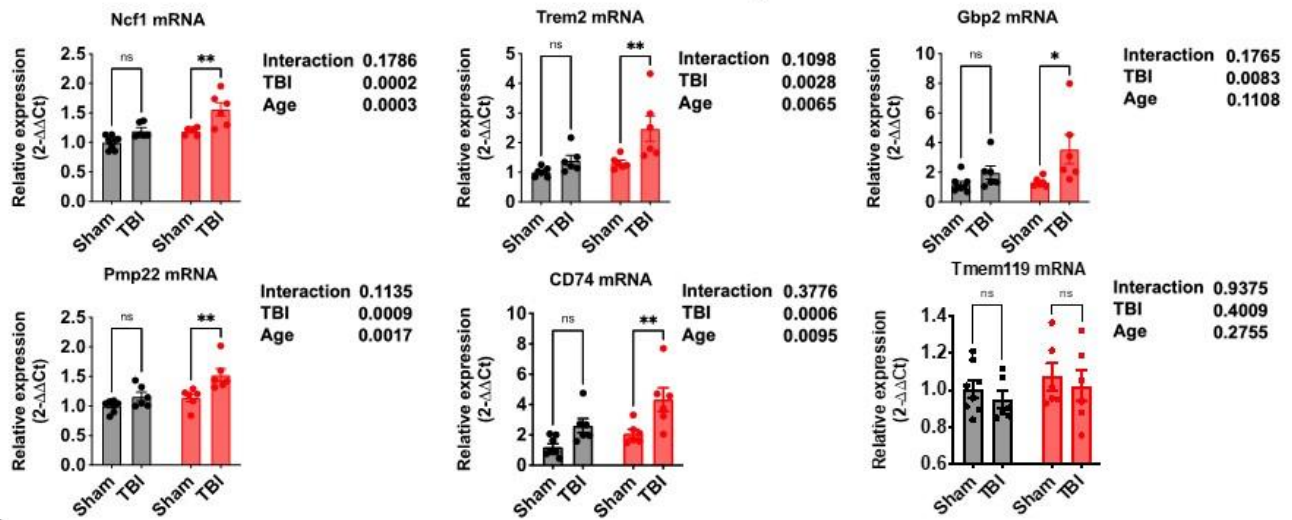

**C Autophagy & Endocytosis Pathways**

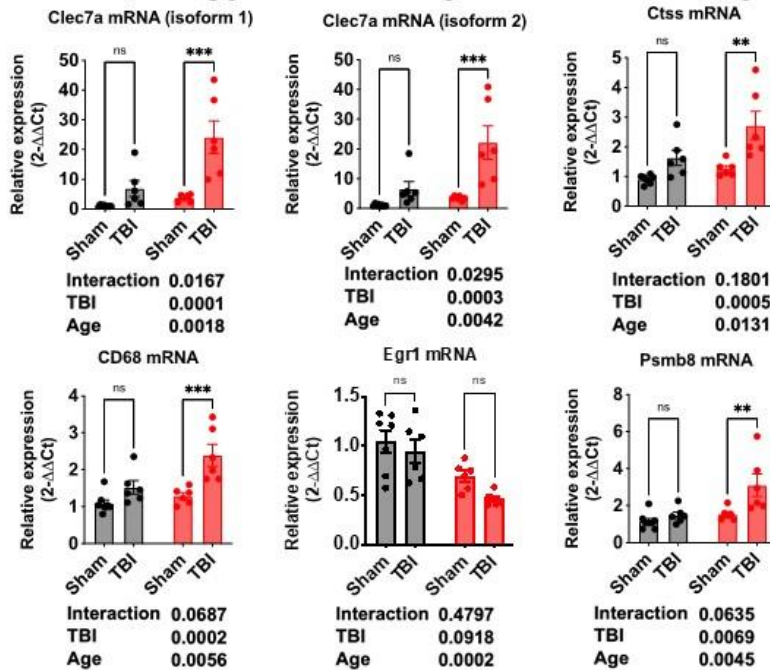

**D Epigenetic Gene**

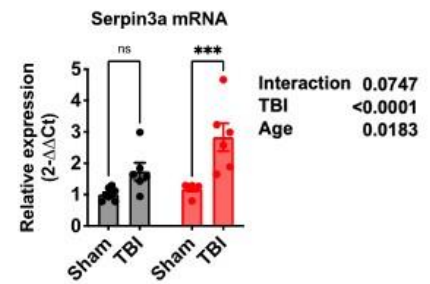

**E Neuronal Gene**

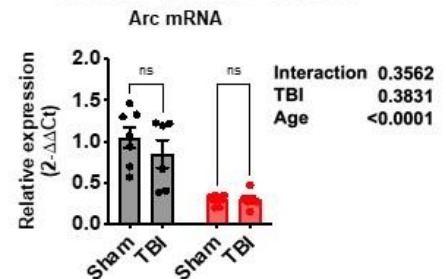

Fig S4

### A Complement Pathway

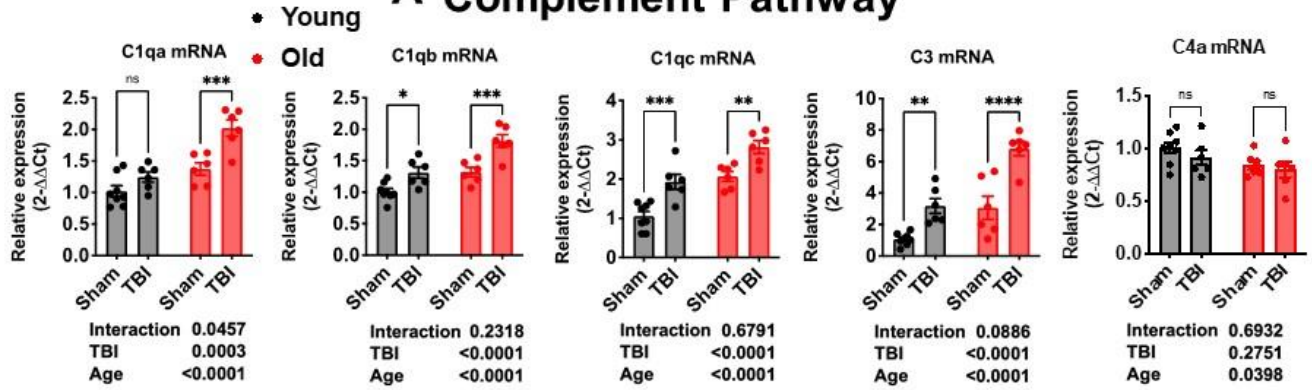

### B Immune Pathways

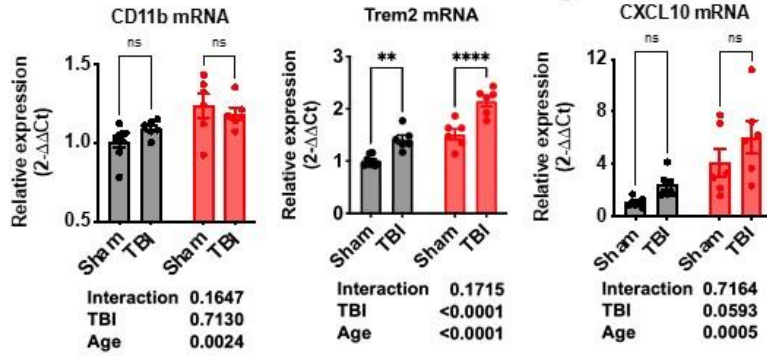

### D Epigenetic Gene

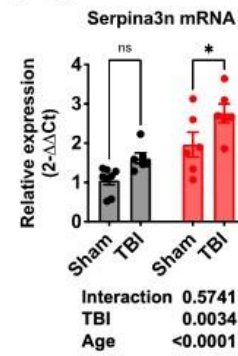

### C Autophagy & Endocytosis Pathways

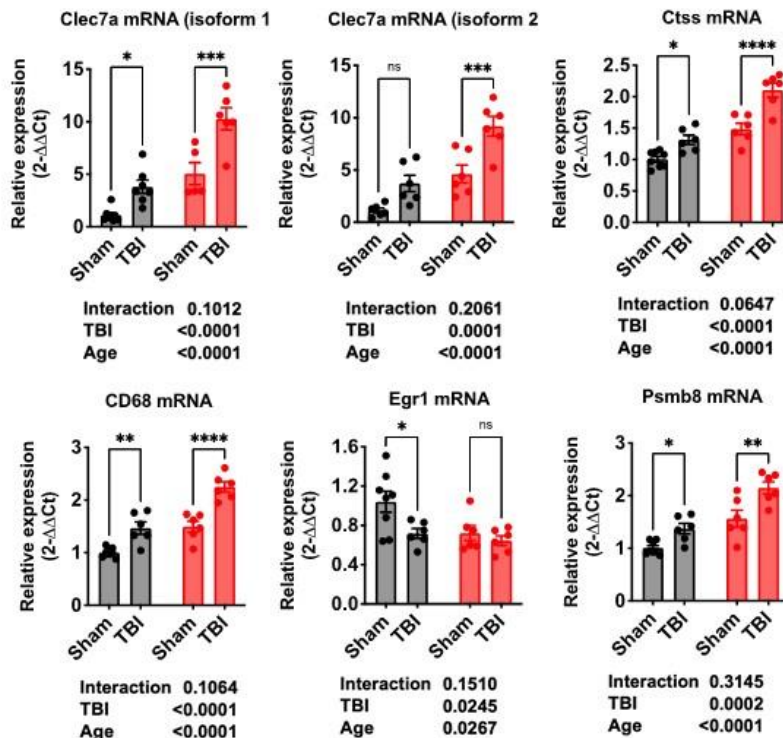

### E Endothelial Gene

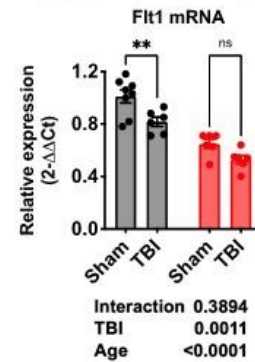

### F Neuronal Gene

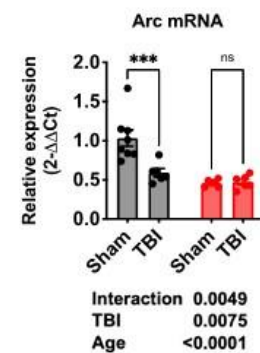

Fig S5

# Lipofuscin

● Young  
● Old

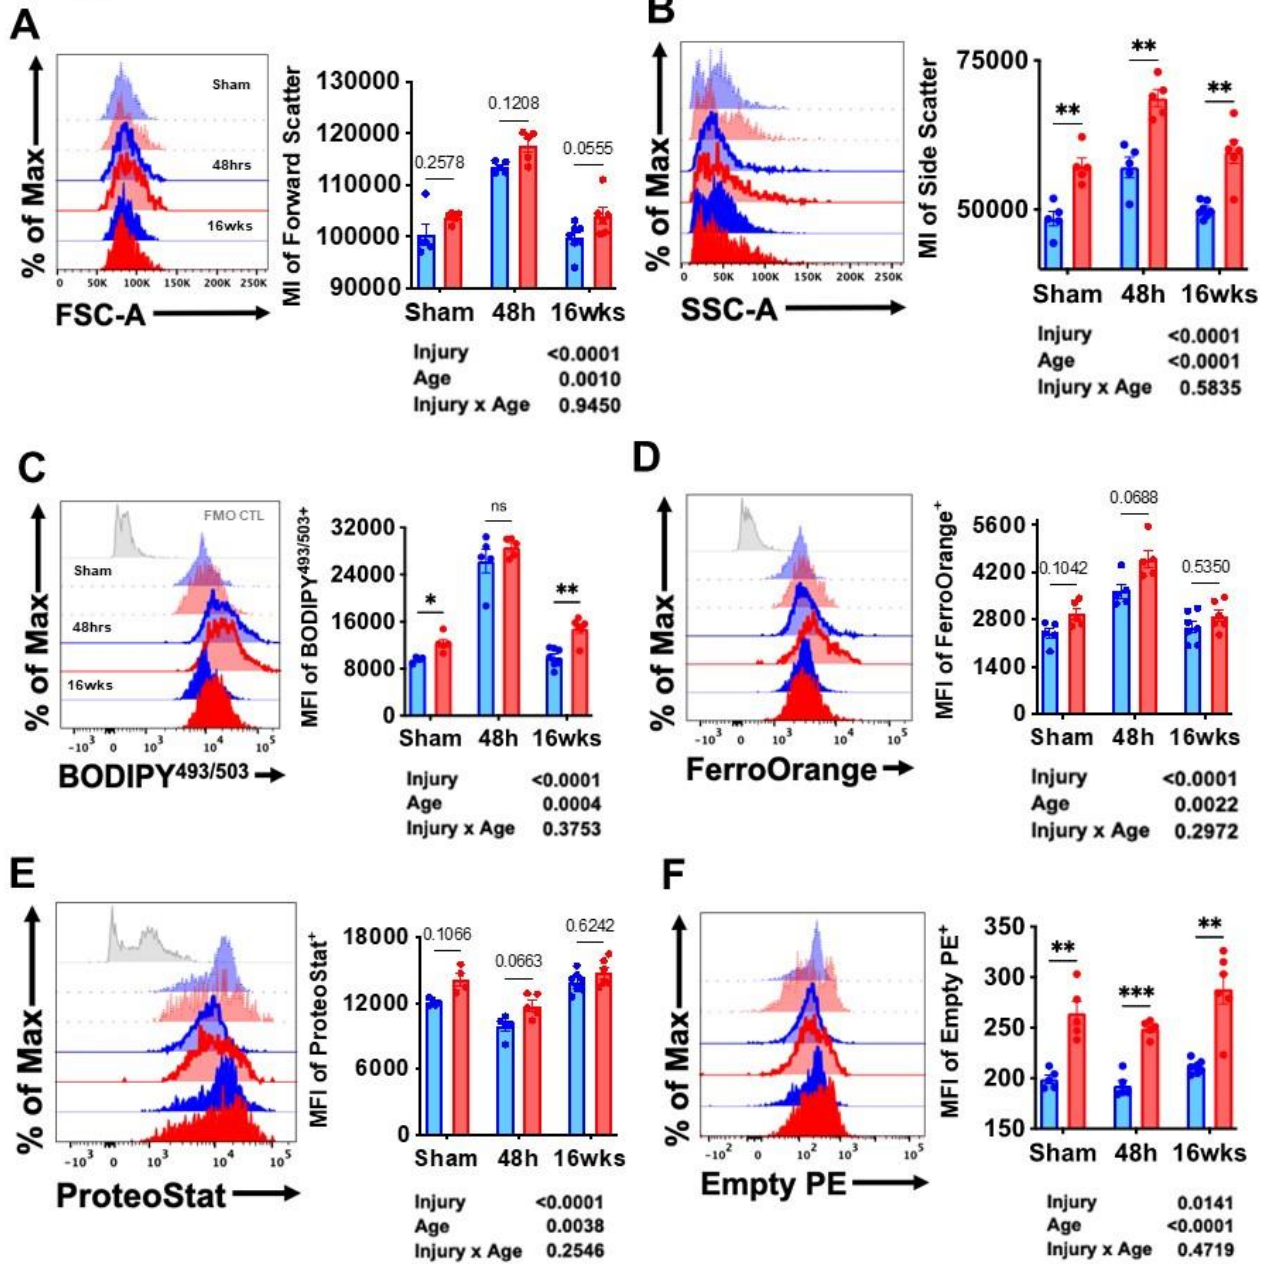

**Fig S6**

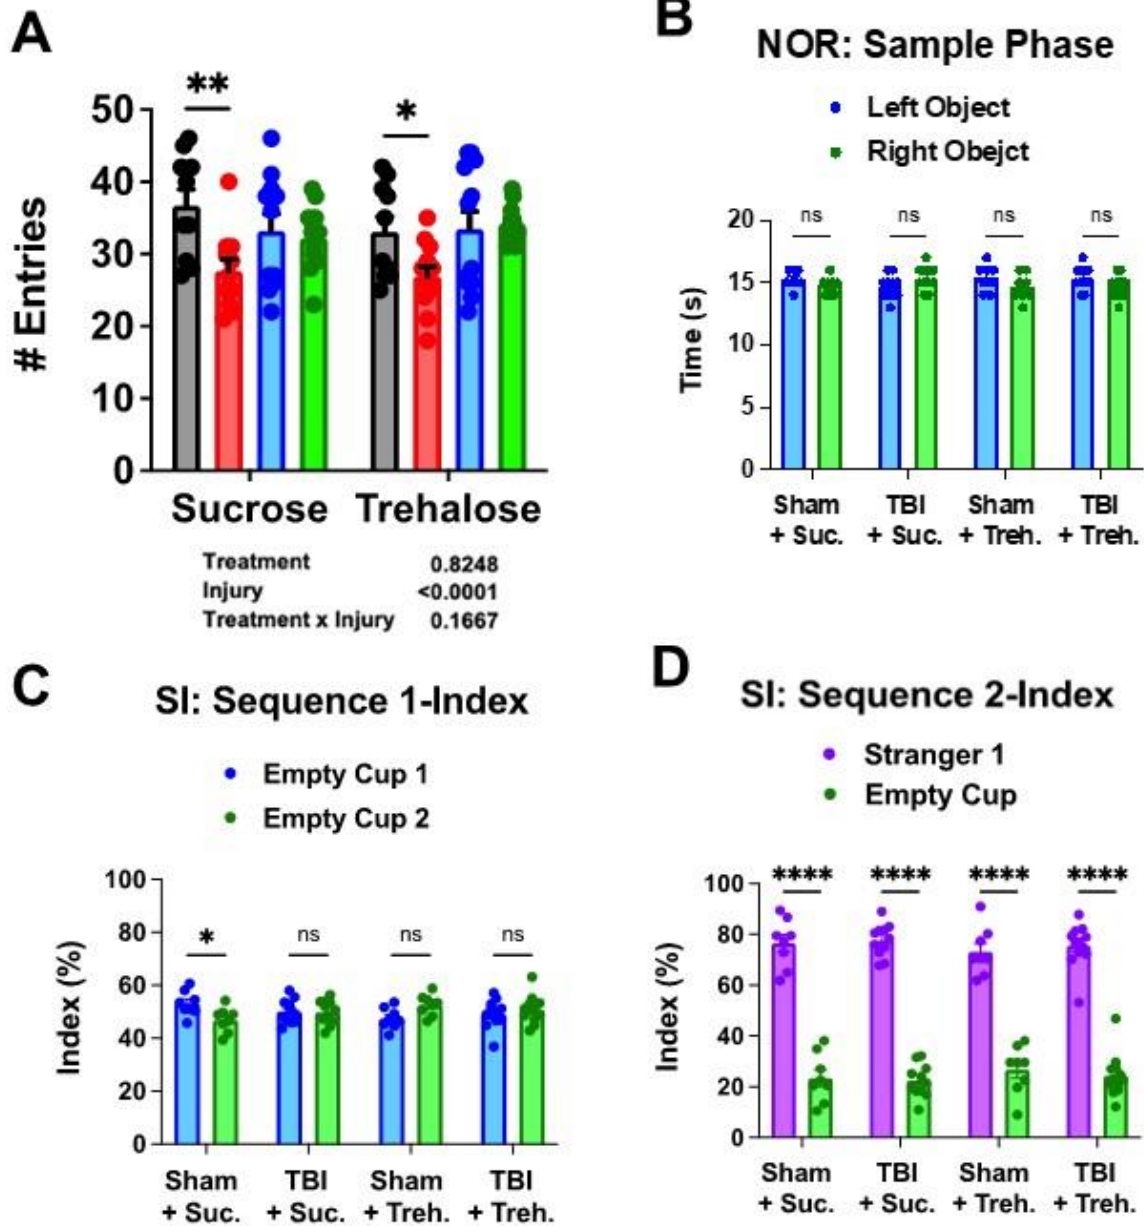



Fig S7

## Autophagy

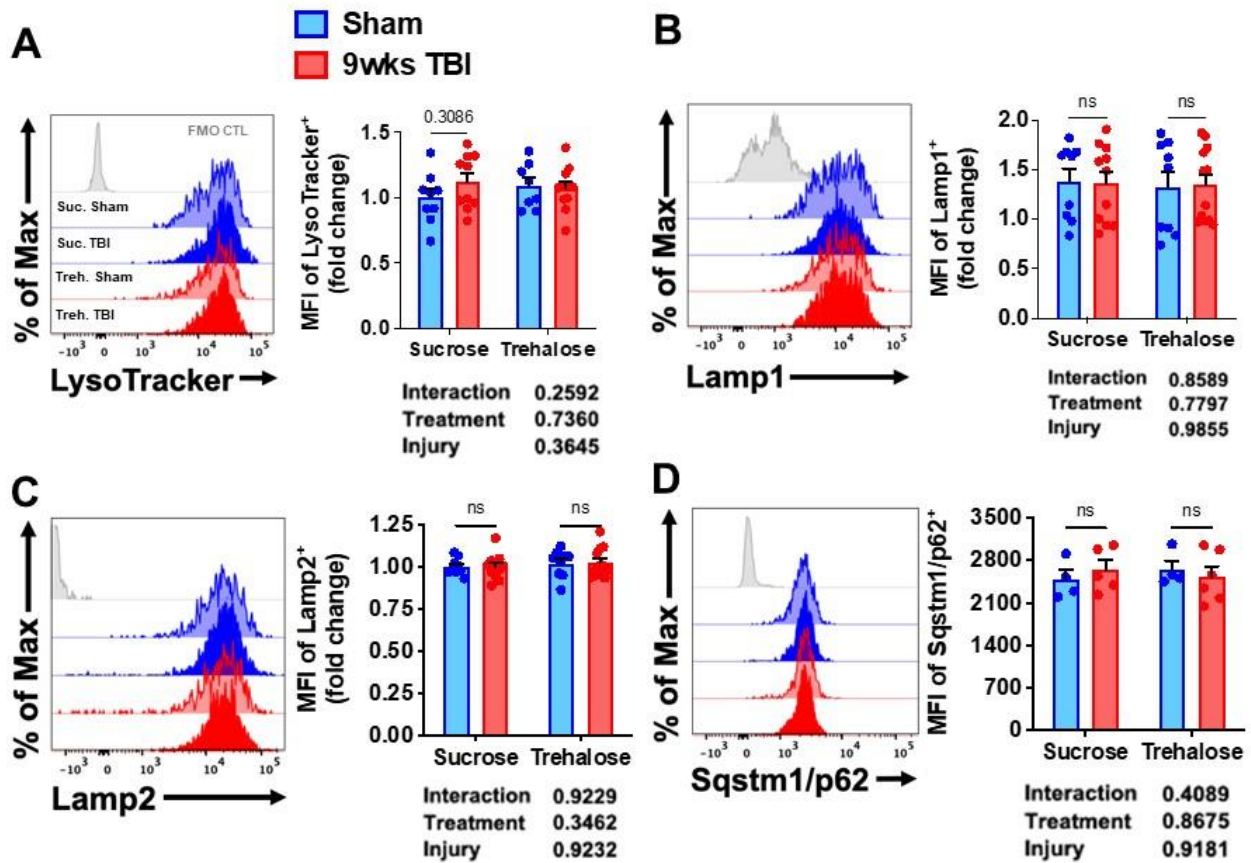

## Epigenetic

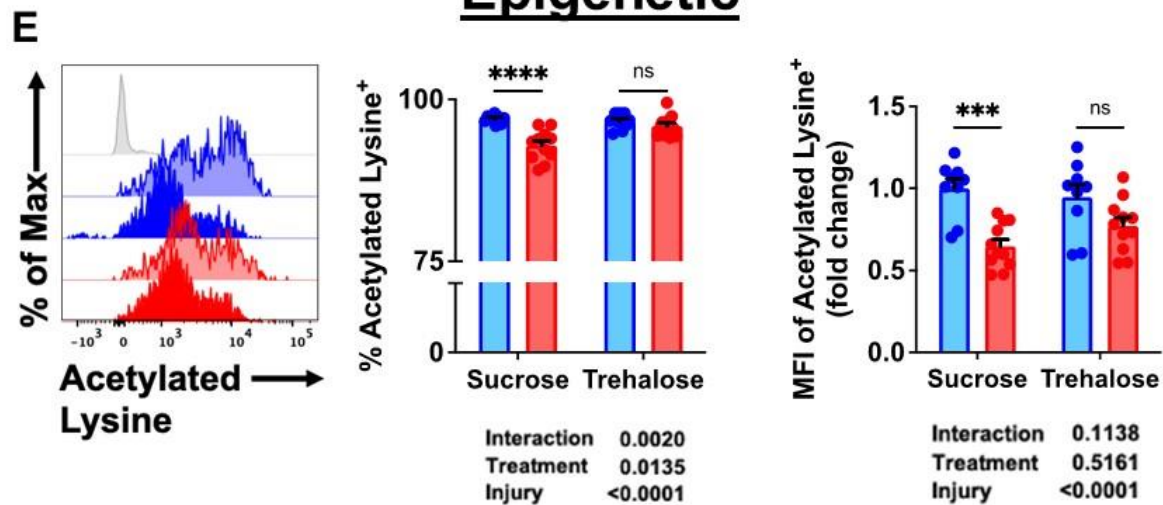

## Supplementary Tables (S1-S3)

**Table S1.** qPCR primers and immuno-labeling reagents.

**Table S2.** The average transcription counts for each group after normalization with housekeeping genes in the ipsilateral cortex.

**Table S3.** The average transcription counts for each group after normalization with housekeeping genes in the ipsilateral hippocampus.

### Table S1. qPCR primers and immuno-labeling reagents.

| Antigen                                 | Host, dilution | Vendor             | Catalog number |
|-----------------------------------------|----------------|--------------------|----------------|
| <b><i>qPCR primers</i></b>              |                |                    |                |
| Clec7a (isoform 1)                      | Mouse          | Applied Biosystems | Mm01183349_m1  |
| Clec7a (isoform 2)                      | Mouse          | Applied Biosystems | Mm01183350_m1  |
| Ncf1                                    | Mouse          | Applied Biosystems | Mm00447921_m1  |
| Ctss                                    | Mouse          | Applied Biosystems | Mm01255859_m1  |
| C1qa                                    | Mouse          | Applied Biosystems | Mm00432142_m1  |
| C1qb                                    | Mouse          | Applied Biosystems | Mm00437836_m1  |
| C1qc                                    | Mouse          | Applied Biosystems | Mm00776126_m1  |
| C3                                      | Mouse          | Applied Biosystems | Mm00437838_m1  |
| Itgam (Cd11b)                           | Mouse          | Applied Biosystems | Mm00434455_m1  |
| Cxcl10                                  | Mouse          | Applied Biosystems | Mm00445235_m1  |
| Pmp22                                   | Mouse          | Applied Biosystems | Mm01333393_m1  |
| Serpin3a                                | Mouse          | Applied Biosystems | Mm00776430_m1  |
| Arc                                     | Mouse          | Applied Biosystems | Mm01204954_g1  |
| Egr1                                    | Mouse          | Applied Biosystems | Mm00656724_m1  |
| C4a                                     | Mouse          | Applied Biosystems | Mm01132415_g1  |
| Gbp2                                    | Mouse          | Applied Biosystems | Mm00494576_g1  |
| Trem2                                   | Mouse          | Applied Biosystems | Mm04209424_g1  |
| Cd74                                    | Mouse          | Applied Biosystems | Mm00658576_m1  |
| Cd68                                    | Mouse          | Applied Biosystems | Mm03047343_m1  |
| Psmb8                                   | Mouse          | Applied Biosystems | Mm00440207_m1  |
| Tmem119                                 | Mouse          | Applied Biosystems | Mm00525305_m1  |
| Egfr                                    | Mouse          | Applied Biosystems | Mm01187858_m1  |
| Flt1                                    | Mouse          | Applied Biosystems | Mm00438980_m1  |
| Gapdh                                   | Mouse          | Applied Biosystems | Mm99999915_g1  |
| <b><i>Flow cytometry antibodies</i></b> |                |                    |                |
| <b><i>Surface antigens</i></b>          |                |                    |                |
| CD45-eF450                              | Mouse, 1:100   | eBioscience        | 48-0451-82     |
| CD11b-APCeF780                          | Mouse, 1:100   | eBioscience        | 47-0112-82     |
| Ly6C-AF700                              | Mouse, 1:50    | Biolegend          | 128024         |

|                                      |                 |                    |                 |
|--------------------------------------|-----------------|--------------------|-----------------|
| MHCI-PECy7                           | Mouse, 1:100    | Biologend          | 114616          |
| <b><i>Intracellular staining</i></b> |                 |                    |                 |
|                                      | Mouse, 1:100    | Biologend          | 652426          |
| Ki67-PECy7                           | Mouse, 1:50     | Biologend          | 307912          |
| PCNA-AF647                           | Mouse, 1:100    | Biologend          | 137010          |
| CD68-PerCPCy5.5                      | Mouse, 1:100    | Millipore Sigma    | FCMAB317PE      |
| NeuN-PE                              | Mouse, 1:100    | StressMarq         | SMC-394D-APC    |
| Vglut1-APC                           | Mouse, 1:100    | Biologend          | 121626          |
| Lamp1-PerCPCy5.5                     | Mouse, 1:100    | Biologend          | 108506          |
| Lamp2-PE                             | Mouse, 1:20     | Novus Biologicals  | NBP1-42822AF647 |
| Sqstm1/p62-AF647                     | Mouse, 1:50     | Biologend          | 847410          |
| ATG5-AF647                           | Mouse, 1:50     | R&D Systems        | FAB6608N        |
| ATG7-AF700                           | Mouse, 1:100    | Biologend          | 838710          |
| Ubiquitin-AF647                      | Mouse, 1:100    | Cell Signaling     | 12230S          |
| H3-AF647                             | Mouse, 1:20     | Technology         | 623408          |
| Acetylated (Ac)                      |                 | Biologend          |                 |
| Lysine (Lys)-PECy7                   | Mouse, 1:100    |                    | 9683S           |
| H3-Ac-Lys9-AF488                     | Mouse, 1:100    | Cell Signaling     | 73508S          |
| H3-Ac-Lys18-AF488                    | Mouse, 1:100    | Technology         | 39030S          |
| H3-Ac-Lys27-AF647                    | Mouse, 1:100    | Cell Signaling     | 84061S          |
| H3-Ac-Lys36-AF647                    | Mouse, 1:20     | Technology         | 613420          |
| Phospho(ser149)-H2A.X-PECy7          | Mouse, 1:100    | Cell Signaling     |                 |
| p16-APC                              | Mouse, 1:100    | Technology         | SPC-1280D-APC   |
| p21-AF488                            | Mouse, 1:50     | Cell Signaling     | NBP2-43697AF488 |
| TNF-PECy7                            | Mouse, 1:50     | Technology         | 506324          |
| IL-1 $\beta$ -PerCPeF710             | Mouse, 1:1000   | Biologend          | 46-7114-82      |
| Brefeldin A                          |                 | StressMarq         | 420601          |
|                                      |                 | RND                |                 |
| <b><i>Ex vivo cell staining</i></b>  |                 |                    |                 |
|                                      |                 | Biologend          |                 |
|                                      |                 | eBioscience        |                 |
|                                      |                 | Biologend          |                 |
| H2dcfda (DCF)                        | 8 $\mu$ M       | ThermoFisher       | D399            |
| LysoTracker Deep Red                 | 75 nM           | ThermoFisher       | L12492          |
|                                      | 1:1000          | Enzo Life Sciences | ENZ-51031-K200  |
| Cyto-ID Autophagy Detection Kit      | 1:1000          | Enzo Life Sciences | ENZ-51035-K100  |
| ProteoStat                           |                 |                    |                 |
| Aggresome                            | 2 $\mu$ M       | ThermoFisher       | D3922           |
| Detection Kit                        | 0.5 $\mu$ mol/L | Dojindo            | LD01-10         |
| BODIPY 493/503                       | 1:300           | ThermoFisher       | F34652          |
| Lipi-Blue                            | 1 $\mu$ mol/L   | Dojindo            | F374-12         |
| FluoroMyelin Red                     | 25 nM           | Biologend          | 424802          |

|                    |           |                 |          |
|--------------------|-----------|-----------------|----------|
| FerroOrange        | 200 µg/mL | Cayman Chemical | 600470   |
| MitoSpy Red        |           | Company         |          |
| CMXRos             | 10 µM     | Millipore Sigma | SCT045   |
| Glucose Uptake     | 1 µM      | ThermoFisher    | P12271   |
| Assay Kit          | 1:500     | Abcam           | ab253380 |
| Biotracker ATP-Red |           |                 |          |
| BODIPY-Pepstatin A |           |                 |          |
| LysoLive™          |           |                 |          |
| Lysosomal Acid     |           |                 |          |
| Lipase Assay Kit   |           |                 |          |

---

***IHC antibodies***

|       |               |                   |            |
|-------|---------------|-------------------|------------|
| NeuN  | Mouse, 1:500  | Millipore         | MAB377     |
| LC3   | Rabbit, 1:200 | Novus Biologicals | NB100-2220 |
| P62   | Guinea Pig,   | Progen            | GP62-C     |
| Iba-1 | 1:500         | Cell Signaling    | 17198S     |
|       | Rabbit, 1:200 | Technology        |            |

**Table S2. The average transcription counts for each group after normalization with housekeeping genes in the ipsilateral cortex.**

| mRNA     | Accession #    | Y/Sham  | Y/TBI   | O/Sham  | O/TBI   |
|----------|----------------|---------|---------|---------|---------|
| Abcc3    | NM_029600.3    | 29.21   | 34.55   | 35.31   | 33.92   |
| Abcc8    | NM_011510.3    | 67.74   | 59.94   | 82.42   | 59.93   |
| Abl1     | NM_009594.4    | 189.06  | 181.85  | 184.26  | 214.9   |
| Adamts16 | NM_172053.2    | 16.59   | 17.21   | 15.92   | 14.27   |
| Ago4     | NM_153177.3    | 45.72   | 47.56   | 34.33   | 40.47   |
| Agt      | NM_007428.3    | 48.92   | 56.5    | 52.55   | 86.5    |
| Al464131 | NM_001085515.2 | 196.81  | 206     | 204.3   | 234.09  |
| Ak1      | NM_001198790.1 | 1570.47 | 1476.82 | 1661.24 | 1564.72 |
| Akt1     | NM_001165894.1 | 849.55  | 832.86  | 931.71  | 933.48  |
| Akt2     | NM_001110208.1 | 351.91  | 311.64  | 333.82  | 338.96  |
| Aldh1l1  | NM_027406.1    | 555.85  | 547.97  | 607.51  | 571.96  |
| Ambra1   | NM_001080754.1 | 873.24  | 863.36  | 845.12  | 843.62  |
| Amigo2   | NM_178114.4    | 92.86   | 99.97   | 98.26   | 113.1   |
| Anapc15  | NM_027532.3    | 235.36  | 234.19  | 247.51  | 250.55  |
| Anxa1    | NM_010730.2    | 19.91   | 28.87   | 23.07   | 29.66   |
| Apc      | NM_007462.3    | 4574    | 4481.47 | 4340.03 | 4244.29 |
| Apex1    | NM_009687.2    | 233.13  | 274.25  | 261.42  | 273.72  |
| ApoE     | NM_001305844.1 | 4332.77 | 5219.54 | 4588.61 | 5845.57 |
| Arc      | NM_018790.2    | 1393.68 | 874.79  | 418.49  | 422.63  |

|          |                |         |         |         |         |
|----------|----------------|---------|---------|---------|---------|
| Arhgap24 | NM_029270.2    | 83.93   | 79.64   | 65.04   | 94.47   |
| Arid1a   | NM_001080819.1 | 570.62  | 558.6   | 530.99  | 568.58  |
| Asb2     | NM_023049.1    | 21.29   | 19.61   | 20.06   | 24      |
| Ash2l    | NM_001080793.1 | 328.5   | 356.3   | 298.25  | 320.22  |
| Asph     | NM_001177849.1 | 2822.34 | 2766.23 | 2877.81 | 2873.61 |
| Atf3     | NM_007498.3    | 14.75   | 20.92   | 13.54   | 17.06   |
| Atg14    | NM_172599.4    | 277.61  | 278.53  | 255.74  | 252.56  |
| Atg3     | NM_026402.3    | 1423.62 | 1444.55 | 1442.03 | 1404.09 |
| Atg5     | NM_001314013.1 | 624.99  | 625.86  | 608.94  | 596.95  |
| Atg7     | NM_028835.1    | 234.84  | 236.94  | 258.46  | 231.88  |
| Atg9a    | NM_001003917.3 | 1557.32 | 1435.42 | 1542.29 | 1469.43 |
| Atm      | NM_007499.2    | 210.18  | 194.26  | 196.62  | 201.06  |
| Atp6v0e  | NM_025272.2    | 177.19  | 202.55  | 172.66  | 201.41  |
| Atp6v1a  | NM_007508.5    | 5225.19 | 5331.43 | 5760.03 | 5280.07 |
| Atr      | NM_019864.1    | 134.73  | 130.88  | 138.62  | 127.91  |
| Axl      | NM_009465.3    | 253.48  | 258.42  | 283.96  | 341.75  |
| B3gnt5   | NM_001159407.1 | 16.15   | 20.45   | 17.32   | 15.94   |
| Bad      | NM_007522.3    | 357.14  | 374.76  | 379.09  | 387.84  |
| Bag3     | NM_013863.4    | 60.55   | 63.27   | 65.43   | 69.74   |
| Bag4     | NM_026121.3    | 1056.85 | 1113.56 | 1162.08 | 1122.59 |
| Bak1     | NM_007523.2    | 201.04  | 191.78  | 185.87  | 208.56  |
| Bard1    | NM_007525.3    | 21.91   | 19.02   | 17.03   | 22.13   |
| Bax      | NM_007527.3    | 196.89  | 191.09  | 178.19  | 183.77  |
| Bbc3     | NM_133234.1    | 54.64   | 48.2    | 44.59   | 53.26   |
| Bcas1    | NM_029815.2    | 1083.68 | 1131.67 | 988.97  | 1368.15 |
| Bcl10    | NM_009740.1    | 290.57  | 283.22  | 266.91  | 283.72  |
| Bcl2     | NM_009741.3    | 109.79  | 105.79  | 108.38  | 103.23  |
| Bcl2a1a  | NM_009742.3    | 44.52   | 63.11   | 54.56   | 87.09   |
| Bcl2l1   | NM_009743.4    | 688.46  | 701.67  | 679.03  | 720.85  |
| Bcl2l11  | NM_001284410.1 | 34.83   | 31.48   | 30.07   | 35.19   |
| Bcl2l2   | NM_007537.1    | 1565.22 | 1477.57 | 1496.62 | 1447.83 |
| Bdnf     | NM_007540.4    | 344.88  | 338.06  | 268.14  | 239.64  |
| Becn1    | NM_019584.3    | 1874.02 | 1815.61 | 1790.95 | 1817.78 |
| Bid      | NM_007544.3    | 146.66  | 148.97  | 174.31  | 171.85  |
| Bik      | NM_007546.2    | 13.81   | 11.72   | 12.6    | 10.3    |
| Bin1     | NM_001083334.1 | 1444.89 | 1466.64 | 1511.76 | 1571.24 |
| Birc2    | NM_007465.2    | 472.71  | 499.52  | 510.12  | 489.81  |
| Birc3    | NM_007464.3    | 20.36   | 24.1    | 21.21   | 19.11   |
| Birc5    | NM_009689.2    | 21.44   | 27.42   | 22.3    | 22.23   |
| Blk      | NM_007549.2    | 14.56   | 17.14   | 13.7    | 14.6    |
| Blm      | NM_001042527.2 | 49.11   | 48.44   | 56.45   | 50.48   |

|          |                |         |         |         |         |
|----------|----------------|---------|---------|---------|---------|
| Blnk     | NM_008528.4    | 112.28  | 121.42  | 118.48  | 116.45  |
| Bmi1     | NM_007552.4    | 492.33  | 492.6   | 461.23  | 486.02  |
| Bnip3    | NM_009760.4    | 2835.54 | 2928.67 | 3056.62 | 2851.47 |
| Bnip3l   | NM_009761.3    | 1368.85 | 1395.44 | 1420.86 | 1391.57 |
| Bok      | NM_016778.2    | 452.62  | 400.47  | 443.77  | 450.37  |
| Bola2    | NM_175103.3    | 1245.08 | 1276.11 | 1273.2  | 1395.39 |
| Braf     | NM_139294.5    | 1171.09 | 1160.13 | 1151.7  | 1144.59 |
| Brca1    | NM_009764.3    | 16.54   | 14.73   | 11.55   | 16.65   |
| Brd2     | NM_010238.3    | 1398.52 | 1323.21 | 1340.29 | 1363.86 |
| Brd3     | NM_001113573.1 | 410.19  | 407.31  | 388.17  | 404.85  |
| Brd4     | NM_001286630.1 | 699.81  | 675.39  | 648.3   | 677.31  |
| Btk      | NM_013482.2    | 22.05   | 25.6    | 21.47   | 31.98   |
| C1qa     | NM_007572.2    | 474.4   | 642.15  | 618.72  | 966.02  |
| C1qb     | NM_009777.2    | 800.7   | 1039.87 | 970.21  | 1429.34 |
| C1qc     | NM_007574.2    | 758.73  | 993.66  | 971.68  | 1410.91 |
| C3       | XM_011246258.1 | 14.16   | 30.47   | 13.86   | 53.05   |
| C3ar1    | NM_009779.2    | 52.07   | 58.95   | 63.6    | 88.71   |
| C4a      | NM_011413.2    | 80.28   | 287.5   | 227.82  | 623.91  |
| C5ar1    | NM_007577.3    | 21.77   | 28.44   | 25.81   | 29.04   |
| C6       | NM_016704.2    | 13.54   | 11.72   | 10.11   | 10.28   |
| Cables1  | NM_001146287.1 | 430.34  | 451.24  | 467.34  | 445.87  |
| Calcoco2 | NM_001271018.1 | 13.54   | 14.05   | 10.11   | 10.42   |
| Calr     | NM_007591.3    | 6616.55 | 6330.69 | 5941.43 | 5984.64 |
| Camk4    | NM_009793.3    | 2279.65 | 2042.54 | 2063.21 | 2115.39 |
| Casp1    | NM_009807.2    | 67.08   | 80.48   | 124.59  | 92.51   |
| Casp2    | NM_007610.1    | 156.75  | 144.96  | 135.53  | 135.93  |
| Casp3    | NM_009810.2    | 149.69  | 153.3   | 145.67  | 156.65  |
| Casp4    | NM_007609.2    | 16.09   | 19.59   | 18.91   | 22.62   |
| Casp6    | NM_009811.3    | 47.4    | 51.08   | 45.94   | 47.87   |
| Casp7    | NM_007611.2    | 52.32   | 45.66   | 48.83   | 57.51   |
| Casp8    | NM_009812.2    | 33.59   | 37.61   | 37.01   | 50.83   |
| Casp9    | NM_015733.4    | 171.15  | 158.44  | 172.97  | 170.49  |
| Cass4    | NM_001080820.2 | 13.54   | 14.3    | 12.36   | 12      |
| Ccl2     | NM_011333.3    | 14.02   | 18.46   | 12.44   | 18.53   |
| Ccl3     | NM_011337.1    | 18.17   | 21.8    | 23.75   | 33.52   |
| Ccl4     | NM_013652.1    | 14.05   | 14.41   | 11.51   | 12.22   |
| Ccl5     | NM_013653.1    | 13.54   | 13.78   | 10.27   | 16.44   |
| Ccl7     | NM_013654.3    | 13.77   | 12.51   | 10.11   | 10.82   |
| Ccng2    | NM_007635.4    | 655.91  | 631.55  | 579.12  | 643.73  |
| Ccni     | NM_017367.3    | 2706.86 | 2559.8  | 2767.14 | 2588.54 |
| Ccr2     | NM_009915.2    | 17.9    | 20.41   | 17.85   | 18.96   |

|         |                |         |        |         |         |
|---------|----------------|---------|--------|---------|---------|
| Ccr5    | NM_009917.5    | 35.7    | 42.88  | 40.62   | 43.17   |
| Cd109   | NM_153098.3    | 19.23   | 33.46  | 22.71   | 32.07   |
| Cd14    | NM_009841.3    | 24.62   | 26.12  | 27.32   | 34.08   |
| Cd163   | NM_053094.2    | 18.38   | 21.33  | 18.94   | 25.33   |
| Cd19    | NM_009844.2    | 13.54   | 13.47  | 11.09   | 9.5     |
| Cd209e  | NM_130905.2    | 13.54   | 11.72  | 10.11   | 10.61   |
| Cd244   | NM_018729.2    | 13.54   | 14.36  | 12.24   | 10.93   |
| Cd24a   | NM_009846.2    | 73.74   | 74.79  | 55.69   | 66.19   |
| Cd300f  | NM_001169153.1 | 15.08   | 13.76  | 17.63   | 17.25   |
| Cd33    | NM_001111058.1 | 50.94   | 59.4   | 58.91   | 65.24   |
| Cd36    | NM_007643.3    | 23.97   | 27.73  | 27.04   | 23.22   |
| Cd3d    | NM_013487.2    | 13.58   | 13.47  | 11.69   | 10.1    |
| Cd3e    | NM_007648.4    | 13.82   | 15.62  | 12.39   | 11.23   |
| Cd3g    | NM_009850.2    | 14.71   | 18.46  | 14.75   | 15.8    |
| Cd40    | NM_011611.2    | 24.49   | 26.99  | 23.42   | 22.81   |
| Cd44    | NM_009851.2    | 18.12   | 22.24  | 18.33   | 18.6    |
| Cd47    | NM_010581.3    | 2115.15 | 2029.7 | 2080.89 | 1997.77 |
| Cd6     | NM_001037801.2 | 65.65   | 64.11  | 76.69   | 49.71   |
| Cd68    | NM_009853.1    | 135.31  | 163.63 | 156.19  | 233.75  |
| Cd69    | NM_001033122.3 | 15.93   | 15.36  | 12.9    | 13.71   |
| Cd70    | NM_011617.1    | 13.91   | 15.52  | 12.29   | 11.96   |
| Cd72    | NM_001110320.1 | 33.7    | 35.43  | 23.29   | 41.59   |
| Cd74    | NM_001042605.1 | 32.46   | 62.61  | 74.18   | 127.86  |
| Cd83    | NM_009856.2    | 243.89  | 249.71 | 293.51  | 260.62  |
| Cd84    | NM_013489.2    | 56.99   | 67.35  | 68.21   | 91.7    |
| Cd86    | NM_019388.3    | 36.68   | 46.9   | 37.23   | 52.2    |
| Cd8a    | NM_001081110.2 | 13.54   | 11.72  | 11.13   | 9.5     |
| Cd8b1   | NM_009858.2    | 13.88   | 12.74  | 11.09   | 9.5     |
| Cdc25a  | NM_007658.3    | 98.45   | 100.39 | 104.43  | 95.64   |
| Cdc7    | NM_001271566.1 | 77.37   | 78.5   | 61.13   | 69.81   |
| Cdk20   | NM_053180.2    | 93.02   | 107.6  | 90      | 88.08   |
| Cdkn1a  | NM_007669.4    | 172.58  | 162.05 | 127.15  | 148.08  |
| Cdkn1c  | NM_009876.3    | 84.96   | 85.19  | 103.79  | 101.05  |
| Ceacam3 | NM_054059.1    | 13.91   | 12.21  | 12.91   | 11.08   |
| Cflar   | NM_207653.3    | 126.72  | 151    | 122.4   | 160.33  |
| Ch25h   | NM_009890.1    | 13.54   | 11.95  | 10.73   | 9.5     |
| Chek1   | NM_007691.5    | 19.7    | 19.24  | 17.97   | 17.78   |
| Chek2   | NM_016681.3    | 23.86   | 21.76  | 19.25   | 22.07   |
| Chn2    | NM_001163640.1 | 292.52  | 282.2  | 263.44  | 277.24  |
| Chst8   | NM_175140.4    | 107.61  | 116.52 | 136.04  | 119.29  |
| Chuk    | NM_001162410.1 | 585.62  | 558.43 | 473.96  | 501.02  |

|         |                |         |         |         |         |
|---------|----------------|---------|---------|---------|---------|
| Cidea   | NM_007702.2    | 29.22   | 43.77   | 32.57   | 45.1    |
| Cideb   | NM_009894.3    | 54.91   | 52.5    | 56.59   | 58.64   |
| Cks1b   | NM_016904.1    | 37.04   | 42.14   | 43.96   | 45.17   |
| Clcf1   | NM_019952.3    | 14.05   | 13.13   | 10.98   | 10.17   |
| Cldn5   | NM_013805.4    | 354.07  | 227.31  | 200.76  | 256.77  |
| Clec7a  | NM_020008.2    | 13.58   | 17.46   | 13.84   | 36.12   |
| Clic4   | NM_013885.2    | 302.53  | 347.41  | 329.46  | 439.11  |
| Cln3    | NM_001146311.1 | 116.77  | 129.07  | 115.87  | 122.97  |
| Clstn1  | NM_023051.4    | 4653.17 | 4271.57 | 4768.08 | 4349.25 |
| Cnn2    | NM_007725.2    | 29.4    | 36.99   | 29.01   | 40.12   |
| Cnp     | NM_009923.2    | 3276.11 | 3679.87 | 3453.29 | 4568.59 |
| Cntnap2 | NM_001004357.2 | 524.83  | 515.08  | 555.17  | 639.79  |
| Coa5    | NM_198006.4    | 840.84  | 875.33  | 866.88  | 915.42  |
| Col6a3  | XM_897036.2    | 25.42   | 28.51   | 31.54   | 34.07   |
| Cotl1   | NM_028071.3    | 613.61  | 647.3   | 677.04  | 792.15  |
| Cox5b   | NM_009942.2    | 9067.72 | 9387.8  | 9331.5  | 9533.5  |
| Cp      | NM_001042611.1 | 116.67  | 134.11  | 117.86  | 191.25  |
| Cpa3    | NM_007753.2    | 13.92   | 12      | 10.27   | 10.9    |
| Creb1   | NM_001037726.1 | 386.81  | 387.06  | 392.05  | 374.55  |
| Crebbp  | NM_001025432.1 | 2122.82 | 2106.19 | 2058.26 | 1958.34 |
| Crem    | NM_001110853.1 | 204.67  | 211.3   | 187.72  | 168.21  |
| Crip1   | NM_007763.3    | 111.67  | 130.43  | 115.75  | 170.32  |
| Cryba4  | NM_021351.1    | 19.17   | 24.15   | 24.66   | 27.88   |
| Csf1    | NM_001113530.1 | 213     | 227.48  | 217.87  | 264.9   |
| Csf1r   | NM_001037859.1 | 478.29  | 543.08  | 462.81  | 578.58  |
| Csf2rb  | NM_007780.4    | 23.19   | 27.79   | 27.48   | 27.03   |
| Csf3r   | NM_001252651.1 | 35.97   | 46.51   | 34.8    | 50.24   |
| Csk     | NM_007783.2    | 284.4   | 303.11  | 251.89  | 306.12  |
| Cst7    | NM_009977.3    | 13.77   | 12.03   | 11.57   | 10.53   |
| Ctse    | NM_007799.3    | 13.54   | 15.27   | 12.52   | 12.29   |
| Ctsf    | NM_019861.1    | 798.53  | 851.13  | 841.83  | 901.93  |
| Ctss    | NM_021281.2    | 791.68  | 965.7   | 931.21  | 1360.67 |
| Ctsw    | NM_009985.4    | 13.54   | 12.74   | 11.7    | 9.75    |
| Cx3cl1  | NM_009142.3    | 1578.64 | 1484.06 | 1377.82 | 1302.3  |
| Cx3cr1  | NM_009987.3    | 556.71  | 596.2   | 617.62  | 745.85  |
| Cxcl10  | NM_021274.1    | 13.54   | 17.17   | 12.24   | 18.17   |
| Cxcl9   | NM_008599.2    | 13.89   | 15.35   | 10.61   | 11.57   |
| Cycs    | NM_007808.4    | 56.08   | 64.44   | 48.64   | 52.93   |
| Cyp27a1 | NM_024264.3    | 29.78   | 28.88   | 29.87   | 37.53   |
| Cyp7b1  | NM_007825.4    | 176.12  | 180.99  | 188.99  | 176.7   |
| Cytip   | NM_139200.4    | 14.18   | 13.13   | 12.23   | 11.22   |



|        |                |         |         |         |         |
|--------|----------------|---------|---------|---------|---------|
| Dab2   | NM_023118.2    | 19.09   | 22.14   | 16.28   | 19.82   |
| Dapk1  | NM_134062.1    | 854.87  | 914.43  | 879.73  | 884.16  |
| Ddb2   | NM_028119.5    | 73.25   | 63.86   | 68.88   | 74.79   |
| Ddx58  | NM_172689.3    | 45.47   | 55.01   | 60.7    | 62.23   |
| Dicer1 | NM_148948.2    | 288.86  | 279.04  | 271.97  | 277.23  |
| Dlg1   | NM_001252433.1 | 1526.25 | 1465.72 | 1410.57 | 1415.05 |
| Dlg4   | NM_001109752.1 | 4310.13 | 4207.17 | 4386.71 | 4659.86 |
| Dlx1   | NM_010053.1    | 150.97  | 165.12  | 168.56  | 139.84  |
| Dlx2   | NM_010054.2    | 26.73   | 26.29   | 26.14   | 24.21   |
| Dna2   | NM_177372.3    | 25.33   | 26.64   | 21.04   | 21.06   |
| Dnmt1  | NM_010066.3    | 185.06  | 197.47  | 196.65  | 188.73  |
| Dnmt3a | NM_007872.4    | 178.5   | 165.93  | 142.64  | 148.62  |
| Dnmt3b | NM_001003960.3 | 13.54   | 13.78   | 10.11   | 9.5     |
| Dock1  | NM_001033420.2 | 194.62  | 201.32  | 177.66  | 219.4   |
| Dock2  | NM_033374.3    | 65.92   | 72.58   | 83.93   | 95.35   |
| Dot1l  | NM_199322.1    | 114.65  | 115.54  | 92.79   | 106.7   |
| Dst    | NM_010081.2    | 900.11  | 891.17  | 866.62  | 846.72  |
| Duoxa1 | NM_145395.2    | 13.54   | 12.08   | 10.89   | 10.27   |
| Dusp7  | NM_153459.4    | 1623.29 | 1476.01 | 1627.8  | 1492.37 |
| E2f1   | NM_007891.4    | 127.9   | 112.91  | 132.35  | 113.61  |
| Eed    | NM_021876.3    | 409.81  | 414.11  | 374.22  | 389.8   |
| Eef2k  | NM_007908.3    | 212.49  | 212.03  | 247.16  | 236.45  |
| Egfr   | NM_207655.2    | 77.6    | 90.13   | 73.04   | 73.45   |
| Egr1   | NM_007913.5    | 5401.83 | 4656.44 | 3234.23 | 2648.24 |
| Ehmt2  | NM_145830.1    | 2053.31 | 2076.55 | 2049.93 | 2162.57 |
| Eif1   | NM_011508.1    | 4870.06 | 4809.9  | 4915.41 | 4930.69 |
| Emcn   | NM_001163522.1 | 70.59   | 60.74   | 59.6    | 72.03   |
| Emp1   | NM_010128.4    | 19.71   | 29.97   | 24.04   | 30.9    |
| Enpp6  | NM_177304.3    | 44.89   | 49.14   | 34.43   | 49.58   |
| Entpd2 | NM_009849.2    | 85.08   | 96.36   | 86.77   | 102.15  |
| Eomes  | NM_010136.2    | 13.54   | 13.13   | 10.68   | 10.51   |
| Ep300  | NM_177821.6    | 930.28  | 880     | 889.36  | 925.17  |
| Epcam  | NM_008532.2    | 14.02   | 13.67   | 11.5    | 11.34   |
| Epg5   | NM_001195633.1 | 432.02  | 422.94  | 405.56  | 396.07  |
| Epsti1 | NM_029495.2    | 18.17   | 16.7    | 17.54   | 16.71   |
| Erbb3  | NM_010153.1    | 74.56   | 84.49   | 62.18   | 84.94   |
| Ercc2  | NM_007949.4    | 293.97  | 276.91  | 286.44  | 291.51  |
| Esam   | NM_027102.3    | 130.02  | 90.11   | 91.24   | 114.43  |
| Ets2   | NM_011809.2    | 976.22  | 1057.17 | 1023.93 | 1094.21 |
| Exo1   | NM_012012.4    | 13.68   | 15.06   | 13.38   | 11.58   |
| Ezh1   | NM_007970.1    | 191.79  | 190.48  | 207.82  | 187.69  |

|         |                |         |         |         |         |
|---------|----------------|---------|---------|---------|---------|
| Ezh2    | NM_007971.2    | 231.34  | 240.34  | 213.75  | 223.13  |
| F3      | NM_010171.3    | 643.41  | 732.35  | 651.73  | 723.95  |
| Fa2h    | NM_178086.3    | 78.14   | 76.12   | 81.75   | 106.66  |
| Fabp5   | NM_010634.3    | 1568.21 | 1705.79 | 1690.57 | 1826.57 |
| Fadd    | NM_010175.5    | 27.31   | 30.56   | 29.18   | 33.54   |
| Fancc   | NM_007985.2    | 82.23   | 74.65   | 84.69   | 84.34   |
| Fancd2  | NM_001033244.3 | 13.9    | 14.14   | 13.25   | 13.98   |
| Fancg   | NM_053081.2    | 105.71  | 99.9    | 97.55   | 96.77   |
| Fas     | NM_007987.2    | 25.93   | 24.02   | 19.47   | 30.35   |
| Fasl    | NM_010177.3    | 15.12   | 14.14   | 13.33   | 12.32   |
| Fbln5   | NM_011812.4    | 34.56   | 32.48   | 30.26   | 45.83   |
| Fcer1g  | NM_010185.4    | 97.27   | 115.41  | 103.18  | 152.47  |
| Fcgr1   | NM_010186.5    | 64.24   | 68.95   | 80.28   | 89.98   |
| Fcgr2b  | NM_001077189.1 | 83.2    | 119.25  | 102.3   | 151.85  |
| Fcgr3   | NM_010188.5    | 77.8    | 99.73   | 81.59   | 112.2   |
| Fcrla   | NM_145141.2    | 15.3    | 18.26   | 12.77   | 12.37   |
| Fcrlb   | NM_001029984.2 | 13.54   | 11.95   | 10.92   | 10.76   |
| Fcr1s   | NM_030707.3    | 205.83  | 239.89  | 201.08  | 239.73  |
| Fdxr    | NM_007997.1    | 16.19   | 17.39   | 14.51   | 19.41   |
| Fen1    | NM_001271614.1 | 137.76  | 135.53  | 144.25  | 159.88  |
| Fgd2    | NM_001159538.1 | 25.65   | 25.62   | 20.84   | 27.86   |
| Fgf13   | NM_010200.2    | 2357.29 | 2244.25 | 2322.97 | 2302.66 |
| Fgl2    | NM_008013.2    | 23.76   | 33.99   | 29.67   | 41.73   |
| Fkbp5   | NM_010220.3    | 124.8   | 134.82  | 136.61  | 167.9   |
| Flt1    | NM_010228.3    | 91.88   | 71.08   | 62.95   | 112.03  |
| Fos     | NM_010234.2    | 556.39  | 407.63  | 139.7   | 181.03  |
| Foxp3   | NM_054039.2    | 14.23   | 14.74   | 14.51   | 12.04   |
| Fpr1    | NM_013521.2    | 13.54   | 13.36   | 11.09   | 9.75    |
| Fscn1   | NM_007984.2    | 2095.82 | 1905.72 | 2015.76 | 2163.41 |
| Fyn     | NM_008054.2    | 1351.29 | 1360.77 | 1342.15 | 1348.98 |
| Gadd45a | NM_007836.1    | 202.51  | 174.07  | 122.49  | 121.08  |
| Gadd45g | NM_011817.2    | 104.43  | 110.81  | 79.89   | 108.3   |
| Gal3st1 | NM_001177691.1 | 82.57   | 84.41   | 81.01   | 107.44  |
| Gba     | NM_001077411.1 | 227.34  | 211.91  | 222.9   | 222.41  |
| Gbp2    | NM_010260.1    | 31.1    | 37.65   | 29.72   | 55.32   |
| Gclc    | NM_010295.2    | 361.6   | 383.35  | 361.69  | 380.85  |
| Gdpd2   | NM_023608.3    | 49.22   | 62.38   | 43.51   | 55.68   |
| Gja1    | NM_010288.3    | 2746.34 | 3223.25 | 2630.77 | 3071.13 |
| Gjb1    | NM_008124.2    | 116.56  | 124.31  | 124.98  | 194.54  |
| Gna15   | NM_010304.3    | 33.02   | 31.64   | 29.67   | 34.19   |
| Gpr183  | NM_183031.2    | 20.69   | 30.14   | 25.61   | 30.17   |

|          |                |         |         |         |         |
|----------|----------------|---------|---------|---------|---------|
| Gpr34    | NM_011823.4    | 219.39  | 221.72  | 207.87  | 251.67  |
| Gpr62    | NM_001159652.1 | 103.58  | 105.39  | 121.36  | 115.85  |
| Gpr84    | NM_030720.1    | 17.92   | 18.69   | 16.11   | 18.03   |
| Grap     | NM_027817.3    | 41.85   | 40.5    | 38.12   | 46.97   |
| Gria1    | NM_001252403.1 | 2066.8  | 1978.71 | 2060.34 | 2304.46 |
| Gria2    | NM_001039195.1 | 4835.92 | 4383.31 | 4311.1  | 4307.72 |
| Gria4    | NM_001113180.1 | 1802.96 | 1712.12 | 1771.04 | 1553.78 |
| Grin2a   | NM_008170.2    | 469.54  | 431.13  | 481.66  | 425.74  |
| Grin2b   | NM_008171.3    | 3160.07 | 2905.88 | 2973.24 | 2900.63 |
| Grm2     | NM_001160353.1 | 458.67  | 431.31  | 490.95  | 364.41  |
| Grm3     | NM_181850.2    | 2368.4  | 2262.31 | 2190.83 | 2120.05 |
| Grn      | NM_008175.3    | 455.7   | 481.83  | 435.36  | 552.86  |
| Gsn      | NM_146120.3    | 369.05  | 410.2   | 358.81  | 480.13  |
| Gstm1    | NM_010358.5    | 44.96   | 51.49   | 50.1    | 60.42   |
| Gzma     | NM_010370.2    | 13.54   | 12.3    | 10.11   | 9.5     |
| Gzmb     | NM_013542.2    | 14.74   | 15.16   | 11.67   | 9.5     |
| H2afx    | NM_010436.2    | 821.02  | 772.1   | 801.98  | 818.21  |
| H2-T23   | NM_010398.3    | 95.87   | 82.62   | 99.02   | 102.86  |
| Hat1     | NM_026115.4    | 481.86  | 510.59  | 505.44  | 506.11  |
| Hcar2    | NM_030701.1    | 14.65   | 14.77   | 12.9    | 15.4    |
| Hdac1    | NM_008228.2    | 142.12  | 154.7   | 139.74  | 146.21  |
| Hdac2    | NM_008229.2    | 1084.02 | 1129.29 | 1027.21 | 1005.93 |
| Hdac4    | NM_207225.1    | 286.6   | 292.09  | 284.03  | 274.33  |
| Hdac6    | NM_010413.3    | 200.05  | 185.78  | 170.73  | 190.11  |
| Hdc      | NM_008230.4    | 15.96   | 19.13   | 13.58   | 13.47   |
| Hells    | NM_008234.3    | 33.2    | 39.63   | 34.52   | 35.86   |
| Hif1a    | NM_010431.2    | 1799.2  | 1824.45 | 1961.56 | 1894.82 |
| Hilpda   | NM_023516.5    | 60.25   | 55.8    | 51.43   | 54.58   |
| Hira     | NM_010435.2    | 475.51  | 428.17  | 466.15  | 435.62  |
| Hist1h1d | NM_145713.3    | 13.54   | 12.1    | 11.42   | 11.56   |
| Hmgb1    | NM_010439.3    | 1858.29 | 1931.69 | 1970.23 | 1828.63 |
| Hmox1    | NM_010442.2    | 41.42   | 45.94   | 46.31   | 51.67   |
| Homer1   | NM_147176.2    | 4382.34 | 4053.56 | 3583.55 | 3145.37 |
| Hpgds    | NM_019455.4    | 79.2    | 82.22   | 90.22   | 89.71   |
| Hprt     | NM_013556.2    | 1015.19 | 1002.81 | 1126.25 | 1108.7  |
| Hps4     | NM_138646.3    | 89.16   | 102.95  | 95.29   | 91.2    |
| Hrk      | NM_007545.2    | 153.9   | 200.87  | 142.57  | 204.39  |
| Hsd11b1  | NM_008288.2    | 413.87  | 400.82  | 475.43  | 333.68  |
| Hspb1    | NM_013560.2    | 51.02   | 51.45   | 36.34   | 65.36   |
| Hus1     | NM_008316.2    | 163.61  | 168.14  | 182.37  | 177.11  |
| Icam2    | NM_010494.1    | 46.92   | 33.4    | 31.8    | 32.16   |

|        |                |         |        |         |         |
|--------|----------------|---------|--------|---------|---------|
| lfi30  | NM_023065.3    | 41.83   | 50.54  | 47.48   | 73.19   |
| lfih1  | NM_027835.2    | 120.07  | 128.78 | 150.4   | 136.12  |
| lfitm2 | NM_030694.1    | 194.65  | 186.63 | 226.68  | 248.06  |
| lfitm3 | NM_025378.2    | 108.29  | 161.05 | 153.58  | 284.74  |
| lfnar1 | NM_010508.1    | 526.89  | 498.46 | 470.16  | 495.54  |
| lfnar2 | NM_001110498.1 | 169.35  | 168.86 | 173.66  | 193.33  |
| lgf1   | NM_001111274.1 | 20.63   | 24.89  | 26.05   | 23.54   |
| lgf1r  | NM_010513.2    | 387.56  | 365.25 | 394.36  | 396.58  |
| lgf2r  | NM_010515.1    | 308.3   | 299.42 | 296.86  | 312.75  |
| lgsf10 | NM_001162884.1 | 34.44   | 43.53  | 36.9    | 37.12   |
| lgsf6  | NM_030691.1    | 16.13   | 18.62  | 17.74   | 23.43   |
| lkbkb  | NM_010546.2    | 327.73  | 299.2  | 301.98  | 288.92  |
| lkbke  | NM_019777.3    | 16.06   | 16.88  | 15.42   | 17.64   |
| lkbkg  | NM_178590.2    | 217.09  | 222.28 | 226.15  | 232.76  |
| ll10rb | NM_008349.5    | 147.42  | 144.81 | 143.09  | 154.13  |
| ll15ra | NM_008358.2    | 35.09   | 40.82  | 36.86   | 29.4    |
| ll1a   | NM_010554.4    | 15.82   | 17.41  | 15.85   | 16.91   |
| ll1b   | NM_008361.3    | 15.5    | 13.59  | 12.09   | 13.86   |
| ll1r1  | NM_001123382.1 | 66.77   | 70.89  | 71.5    | 83.32   |
| ll1r2  | NM_010555.4    | 13.54   | 15.36  | 12.48   | 9.5     |
| ll1rap | NM_134103.2    | 325.19  | 305.45 | 321.34  | 292.1   |
| ll1rl2 | NM_133193.3    | 19.58   | 27.73  | 25.02   | 28.28   |
| ll1rn  | NM_031167.5    | 13.54   | 15.25  | 11.53   | 10.32   |
| ll21r  | NM_021887.1    | 15.13   | 18.38  | 15.65   | 17.22   |
| ll2rg  | NM_013563.3    | 26.04   | 27     | 23.68   | 29.57   |
| ll3    | NM_010556.4    | 17.44   | 16.05  | 18.29   | 14.96   |
| ll3ra  | NM_008369.1    | 13.78   | 14.63  | 10.12   | 10.45   |
| ll6ra  | NM_010559.2    | 52.39   | 53.8   | 49.32   | 52.19   |
| lnpp5d | NM_001110192.1 | 39.78   | 41.39  | 43.24   | 56.47   |
| lqsec1 | NM_001134383.1 | 2617.36 | 2409.5 | 2608.88 | 2348.75 |
| lrak1  | NM_008363.2    | 166.62  | 176.71 | 165.16  | 171.76  |
| lrak2  | NM_001113553.1 | 209.99  | 208.29 | 217.53  | 235.41  |
| lrak3  | NM_028679.3    | 25.4    | 31.39  | 33.43   | 37.99   |
| lrak4  | NM_029926.5    | 33.84   | 36.35  | 31.21   | 39.22   |
| lrf1   | NM_008390.1    | 78.36   | 74.85  | 69.03   | 79.04   |
| lrf2   | NM_008391.2    | 515.12  | 501.69 | 503.95  | 464.46  |
| lrf3   | NM_016849.4    | 126.72  | 131.54 | 111.42  | 126.21  |
| lrf4   | NM_013674.1    | 17.5    | 18.57  | 18.13   | 14.84   |
| lrf6   | NM_016851.2    | 16.27   | 15.91  | 17.53   | 17.41   |
| lrf7   | NM_016850.2    | 27.35   | 23.95  | 28.7    | 42.25   |
| lrf8   | NM_008320.3    | 44.47   | 51.09  | 40.8    | 59.31   |

|         |                |        |        |        |        |
|---------|----------------|--------|--------|--------|--------|
| Islr2   | NM_001161538.1 | 444.43 | 550.27 | 406.64 | 484.71 |
| Itga6   | NM_008397.3    | 252.53 | 241.86 | 225.16 | 258.78 |
| Itga7   | NM_008398.2    | 57.25  | 55.23  | 58.8   | 62.53  |
| Itgam   | NM_001082960.1 | 93.42  | 117.73 | 103.27 | 137.32 |
| Itgav   | NM_008402.2    | 796.98 | 690.06 | 787.72 | 820.53 |
| Itgax   | NM_021334.2    | 13.54  | 14.74  | 12.08  | 11.32  |
| Itgb5   | NM_001145884.1 | 445.69 | 527.54 | 487.45 | 593.96 |
| Jag1    | NM_013822.2    | 59.61  | 48.88  | 51.1   | 59.05  |
| Jam2    | NM_023844.4    | 319.9  | 319.82 | 320.26 | 340.13 |
| Jarid2  | NM_021878.2    | 258.94 | 257.09 | 238.34 | 265.56 |
| Jun     | NM_010591.2    | 463.49 | 512.65 | 392.34 | 487.03 |
| Kat2a   | NM_020004.5    | 578.81 | 542.4  | 570.55 | 597.21 |
| Kat2b   | NM_020005.3    | 260.24 | 257.04 | 255.09 | 293.99 |
| Kcnd1   | NM_008423.1    | 53.56  | 52.29  | 46.57  | 57.08  |
| Kcnj10  | NM_001039484.1 | 746.82 | 707.39 | 720.75 | 779.53 |
| Kcnk13  | NM_146037.1    | 52.18  | 59.18  | 60.01  | 62.61  |
| Kdm1a   | NM_133872.1    | 863.88 | 879.11 | 834.85 | 815.71 |
| Kdm1b   | NM_172262.3    | 91.64  | 100.23 | 84.81  | 87.87  |
| Kdm2a   | NM_001001984.2 | 588.94 | 552    | 521.06 | 568.33 |
| Kdm2b   | NM_001003953.1 | 136.74 | 128.67 | 129.4  | 136.67 |
| Kdm3a   | NM_001038695.2 | 428.18 | 421.79 | 347.18 | 403.56 |
| Kdm3b   | NM_001081256.1 | 16.64  | 18.2   | 18.92  | 18.69  |
| Kdm4a   | NM_172382.2    | 210.31 | 212.01 | 223.18 | 250.56 |
| Kdm4b   | NM_172132.1    | 471.28 | 462.48 | 449.62 | 503.53 |
| Kdm4c   | NM_144787.1    | 328.01 | 299.68 | 278.94 | 313.23 |
| Kdm4d   | NM_173433.2    | 30.97  | 22.78  | 35.96  | 30.49  |
| Kdm5a   | XR_377436.1    | 414.37 | 418.28 | 405.03 | 426.1  |
| Kdm5b   | NM_152895.2    | 748.89 | 749.24 | 684.49 | 682.62 |
| Kdm5c   | NM_013668.3    | 482.07 | 456.73 | 448    | 446.27 |
| Kdm5d   | NM_011419.3    | 213.85 | 208.36 | 194.69 | 201.06 |
| Kdm6a   | NM_009483.1    | 167.89 | 149.48 | 166.47 | 175.39 |
| Kif2c   | NM_134471.3    | 14.24  | 15.45  | 10.92  | 12.59  |
| Kir3dl1 | NM_177749.3    | 13.93  | 11.95  | 11.51  | 10.14  |
| Kir3dl2 | NM_177748.2    | 24.07  | 26.22  | 19.17  | 21.15  |
| Kit     | NM_001122733.1 | 134.28 | 149.55 | 139.72 | 141.18 |
| Klrb1   | NM_001099918.1 | 14.61  | 11.8   | 13.82  | 10.75  |
| Klrd1   | NM_010654.2    | 13.54  | 13.78  | 10.91  | 9.5    |
| Klrk1   | NM_001083322.1 | 19.18  | 23.88  | 17.59  | 18.97  |
| Kmt2a   | NM_001081049.1 | 548.01 | 540.13 | 521.24 | 535.66 |
| Kmt2c   | NM_001081383.1 | 407.69 | 402.3  | 392.48 | 425.16 |
| Lacc1   | NM_172488.2    | 66.29  | 74.89  | 62.08  | 76.94  |

|          |                |         |         |         |         |
|----------|----------------|---------|---------|---------|---------|
| Lag3     | NM_008479.1    | 52.82   | 61.14   | 78.21   | 94.35   |
| Lair1    | NM_001113474.1 | 94.29   | 98.26   | 115.95  | 126.39  |
| Lamp1    | NM_010684.2    | 3703.94 | 3906.66 | 4050.46 | 4448.25 |
| Lamp2    | NM_001017959.1 | 1649.47 | 1762.26 | 1791.25 | 1882.01 |
| Lcn2     | NM_008491.1    | 13.79   | 13.58   | 20.74   | 45.62   |
| Ldha     | NM_010699.2    | 3937.37 | 3827.11 | 3852.18 | 4093.87 |
| Ldlrad3  | NM_178886.2    | 116.76  | 116.66  | 105.44  | 138.42  |
| Lfng     | NM_008494.3    | 233.23  | 250.73  | 222.67  | 277.92  |
| Lgmn     | NM_011175.3    | 1309.64 | 1402.09 | 1347.28 | 1461.72 |
| Lig1     | NM_001083188.1 | 102.58  | 91.36   | 105.34  | 102.36  |
| Lilrb4a  | NM_013532.3    | 19.55   | 33.62   | 25.31   | 43.27   |
| Lingo1   | NM_181074.4    | 2845.89 | 2610.47 | 2817.72 | 2451.33 |
| Lmna     | NM_001002011.2 | 523.89  | 483.6   | 549.59  | 505.74  |
| Lmnb1    | NM_010721.2    | 109.2   | 98.2    | 108.12  | 95.02   |
| Lrg1     | NM_029796.2    | 17.57   | 22.16   | 17.19   | 22.35   |
| Lrrc25   | NM_153074.3    | 14.46   | 15.91   | 13.19   | 16.44   |
| Lrrc3    | NM_145152.4    | 155.64  | 165.78  | 154.83  | 187.2   |
| Lsr      | NM_001164184.1 | 69.52   | 59.83   | 44.52   | 72.89   |
| Lst1     | NM_010734.2    | 19.98   | 20.26   | 15.17   | 16.14   |
| Lta      | NM_010735.2    | 16.13   | 16.64   | 13.21   | 14.28   |
| Ltb      | NM_008518.2    | 19.49   | 16.26   | 15.7    | 18.06   |
| Ltbr     | NM_010736.3    | 41.64   | 50.33   | 45.04   | 56.22   |
| Ltc4s    | NM_008521.1    | 15.13   | 18.52   | 14.13   | 18.29   |
| Ly6a     | NM_010738.2    | 201.29  | 175.15  | 235.27  | 354.93  |
| Ly6g     | XM_909927.2    | 14.77   | 13.78   | 10.11   | 10.31   |
| Ly9      | NM_008534.2    | 21.52   | 29.47   | 29.52   | 34.81   |
| Lyn      | NM_010747.1    | 59.53   | 62.77   | 64.78   | 79.61   |
| Mafb     | NM_010658.2    | 472.36  | 444.68  | 504.69  | 475.86  |
| Maff     | NM_010755.3    | 16.1    | 17.7    | 14      | 20.36   |
| Mag      | NM_010758.2    | 208     | 221.52  | 202.26  | 285.93  |
| Mal      | NM_001171187.1 | 1067.76 | 1199.27 | 1099.91 | 1450.87 |
| Man2b1   | NM_010764.2    | 376.92  | 395.91  | 425.99  | 475.9   |
| Map1lc3a | NM_025735.1    | 1868.37 | 1735.39 | 1963.4  | 1931.08 |
| Map2k1   | NM_008927.3    | 4402.86 | 4530.37 | 4435.94 | 4831.98 |
| Map2k4   | NM_009157.4    | 2123.63 | 2061.47 | 2055.93 | 1934.66 |
| Map3k1   | NM_011945.2    | 99.96   | 90.5    | 90.14   | 100.47  |
| Map3k14  | NM_016896.3    | 30.74   | 26.39   | 25.1    | 20.54   |
| Mapk10   | NM_001081567.1 | 4939.55 | 4987.86 | 4983.97 | 4402.97 |
| Mapk12   | NM_013871.3    | 21.83   | 21.37   | 17.09   | 26.69   |
| Mapk14   | NM_011951.2    | 671.1   | 699.74  | 689.96  | 643.81  |
| Mapt     | NM_001038609.2 | 1824.49 | 1738.87 | 1803.18 | 1766.24 |

|        |                |          |         |          |         |
|--------|----------------|----------|---------|----------|---------|
| Marco  | NM_010766.2    | 17.4     | 17.17   | 19.38    | 17.6    |
| Mavs   | NM_144888.2    | 78.23    | 71.66   | 77.05    | 90.24   |
| Mb21d1 | NM_173386.4    | 18.2     | 17.57   | 20.89    | 19.12   |
| Mbd2   | NM_010773.2    | 1383.46  | 1405.18 | 1318.22  | 1507.84 |
| Mbd3   | NM_013595.2    | 1013.55  | 976.34  | 953.63   | 1042.24 |
| Mcm2   | NM_008564.2    | 36.62    | 33.52   | 35.85    | 36.24   |
| Mcm5   | NM_008566.2    | 77.28    | 72.91   | 79.37    | 70      |
| Mcm6   | NM_008567.1    | 55.64    | 62.61   | 64.98    | 64.17   |
| Mdc1   | NM_001010833.2 | 133.43   | 124.95  | 128.04   | 133.13  |
| Mdm2   | NM_010786.4    | 688.25   | 634.98  | 613.78   | 642.59  |
| Mef2c  | NM_001170537.1 | 10330.65 | 9099.02 | 10933.65 | 8358.61 |
| Mertk  | NM_008587.1    | 354.15   | 382.35  | 385.12   | 432.05  |
| Mfge8  | NM_008594.2    | 266.55   | 266.76  | 254.1    | 276.19  |
| Mgmt   | NM_008598.2    | 25.4     | 28.08   | 31.54    | 28.94   |
| Mmp12  | NM_008605.3    | 13.54    | 16.69   | 10.66    | 22.31   |
| Mmp14  | NM_008608.3    | 47.8     | 63.94   | 39.83    | 61.67   |
| Mobp   | NM_001039364.2 | 2487.35  | 2644.86 | 2428.7   | 3467.76 |
| Mog    | NM_010814.2    | 438.35   | 489.11  | 420.31   | 597.49  |
| Mpeg1  | NM_010821.1    | 230.72   | 276.61  | 310.42   | 406.28  |
| Mpg    | NM_010822.3    | 44.31    | 43.73   | 51.45    | 49.79   |
| Mr1    | NM_008209.4    | 76.15    | 90.04   | 100.99   | 94.26   |
| Mre11a | NM_018736.2    | 213.54   | 213.05  | 205.38   | 217.25  |
| Ms4a1  | NM_007641.5    | 13.54    | 11.72   | 10.11    | 9.5     |
| Ms4a2  | NM_001276330.1 | 13.54    | 11.72   | 10.61    | 9.5     |
| Ms4a4a | XM_003086124.1 | 15.08    | 18.48   | 19.69    | 19.81   |
| Msh2   | NM_008628.2    | 435.51   | 434.42  | 453.53   | 420.66  |
| Msn    | NM_010833.2    | 60.04    | 72.68   | 68.41    | 98.92   |
| Msr1   | NM_001113326.1 | 15.84    | 12.86   | 13.84    | 13.39   |
| Mvp    | NM_080638.2    | 49.04    | 61.65   | 56.39    | 73.95   |
| Myc    | NM_010849.4    | 49.63    | 55.92   | 44.33    | 50.79   |
| Myct1  | NM_026793.2    | 26.35    | 25.69   | 29.5     | 23.34   |
| Myd88  | NM_010851.2    | 49.7     | 48.56   | 47.54    | 53.72   |
| Myrf   | NM_001033481.1 | 366.28   | 363.06  | 338.6    | 501.38  |
| Nbn    | NM_013752.3    | 166.15   | 185.63  | 169.43   | 160.59  |
| Ncaph  | NM_144818.3    | 21.75    | 20.06   | 17.64    | 23.02   |
| Ncf1   | NM_001286037.1 | 38.04    | 43.71   | 48.18    | 68.44   |
| Ncor1  | NM_011308.2    | 1160.11  | 1090.89 | 1153.98  | 1110.88 |
| Ncor2  | NM_011424.2    | 695.86   | 660.7   | 684.33   | 687.62  |
| Ncr1   | NM_010746.3    | 13.54    | 11.72   | 10.11    | 9.5     |
| Nefl   | NM_010910.1    | 1428.04  | 1231.8  | 1694.67  | 1475.51 |
| Nfe2l2 | NR_132727.1    | 40.02    | 43.44   | 44.26    | 52.95   |

|         |                |         |         |         |         |
|---------|----------------|---------|---------|---------|---------|
| Nfkb1   | NM_008689.2    | 198.23  | 198.38  | 174.36  | 200.83  |
| Nfkb2   | NM_019408.2    | 20.14   | 22.7    | 14.73   | 25.79   |
| Nfkbia  | NM_010907.2    | 67.12   | 67.61   | 60.28   | 87.36   |
| Nfkbie  | NM_008690.3    | 28.74   | 27.72   | 32.6    | 23.41   |
| Ngf     | NM_001112698.1 | 65.61   | 65.4    | 61.96   | 52.24   |
| Ngfr    | NM_033217.3    | 15.7    | 16.89   | 19.6    | 24.08   |
| Ninj2   | NM_016718.2    | 23.14   | 21.25   | 17.81   | 24.04   |
| Nkg7    | NM_024253.4    | 15.58   | 17.13   | 12.85   | 10.88   |
| Nlgn1   | NM_138666.3    | 1476.89 | 1575.7  | 1404.88 | 1523.83 |
| Nlgn2   | NM_198862.2    | 2938.49 | 2700.43 | 3018.83 | 2977.05 |
| Nlrp3   | NM_145827.3    | 15.92   | 14.15   | 16.42   | 16.77   |
| Nod1    | NM_172729.2    | 39.16   | 36.59   | 40.42   | 44.96   |
| Nostrin | NM_181547.3    | 43.97   | 45.49   | 39.15   | 55.79   |
| Npl     | NM_028749.1    | 75.18   | 91.83   | 81.89   | 96.09   |
| Npnt    | NM_001029836.1 | 368.37  | 291.24  | 341.96  | 259.85  |
| Nptx1   | NM_008730.2    | 5130.26 | 4887.52 | 5171.53 | 4534.26 |
| Nqo1    | NM_008706.5    | 56.91   | 77.51   | 74.15   | 80.2    |
| Nrgn    | NM_022029.2    | 9898.27 | 8158.18 | 9702.72 | 8588.96 |
| Nrm     | NM_134122.2    | 41.84   | 36.31   | 34.9    | 37.52   |
| Nrp2    | NM_001077403.1 | 127.16  | 165.64  | 105.13  | 188.12  |
| Nthl1   | NM_008743.2    | 39.56   | 39.49   | 37.5    | 33.71   |
| Nwd1    | NM_176940.5    | 370.17  | 365.01  | 377.5   | 388.04  |
| Oas1g   | NM_011852.2    | 19.84   | 22.65   | 17.22   | 24.02   |
| Ogg1    | NM_010957.4    | 48.7    | 48.88   | 52.25   | 60.39   |
| Olfml3  | NM_133859.2    | 155.84  | 170.5   | 158.97  | 186.77  |
| Opalin  | NM_153520.1    | 422.01  | 460.53  | 449.09  | 546.95  |
| Optn    | NM_181848.4    | 192.56  | 213.57  | 226.87  | 217.07  |
| Osgin1  | NM_027950.1    | 16.28   | 17.13   | 18.02   | 17.36   |
| Osmr    | NM_011019.3    | 34.13   | 48.87   | 43.16   | 55.86   |
| P2rx7   | NM_001038839.2 | 108.81  | 116.57  | 109.6   | 139.76  |
| P2ry12  | NM_027571.3    | 388.12  | 393.18  | 422.99  | 474.12  |
| Pacsin1 | NM_011861.3    | 3200.6  | 2872.64 | 3206.53 | 3063.52 |
| Padi2   | NM_008812.2    | 130.04  | 180.48  | 131.61  | 197.14  |
| Pak1    | NM_011035.2    | 7898.9  | 7616.25 | 8131.77 | 7067.56 |
| Parp1   | NM_007415.2    | 514.86  | 492.02  | 497.16  | 493.38  |
| Parp2   | NM_009632.2    | 259.71  | 251.85  | 261.43  | 252.28  |
| Pcna    | NM_011045.2    | 764.08  | 812.13  | 794.75  | 752.91  |
| Pdpn    | NM_010329.2    | 175.26  | 226.57  | 197.31  | 258.31  |
| Pecam1  | NM_008816.2    | 185.33  | 139.64  | 143.29  | 172.49  |
| Pex14   | NM_019781.2    | 478.16  | 423.28  | 480.73  | 441.57  |
| Pik3ca  | NM_008839.1    | 821.46  | 840.23  | 787.76  | 729.55  |



|         |                |         |         |          |          |
|---------|----------------|---------|---------|----------|----------|
| Pik3cb  | NM_029094.3    | 589.56  | 568.96  | 582.42   | 556.24   |
| Pik3cd  | XM_003945690.1 | 134.22  | 128.47  | 120.1    | 117.33   |
| Pik3cg  | NM_020272.2    | 31.1    | 36.67   | 34.19    | 42.32    |
| Pik3r1  | NM_001024955.1 | 1027.54 | 1017.44 | 1064.38  | 1052.05  |
| Pik3r2  | NM_008841.2    | 1239.67 | 1134.85 | 1186.02  | 1158.77  |
| Pik3r5  | NM_177320.2    | 18.28   | 15.45   | 15.59    | 15.74    |
| Pilra   | NM_153510.3    | 14.37   | 15.25   | 12.59    | 11.61    |
| Pilrb1  | NM_133209.2    | 13.54   | 12.74   | 10.11    | 9.83     |
| Pink1   | NM_026880.2    | 4125.89 | 4106.35 | 4402.44  | 4333.32  |
| Pla2g4a | NM_008869.2    | 30.64   | 28.92   | 30.4     | 35.69    |
| Pla2g5  | NM_001122954.1 | 36.93   | 42.9    | 37.4     | 39.55    |
| Plcg2   | NM_172285.1    | 58.2    | 64.74   | 61.4     | 80.19    |
| Pld1    | NM_001164056.1 | 49.45   | 51.22   | 47.12    | 51.22    |
| Pld2    | NM_008876.2    | 51.79   | 52.43   | 50.76    | 62.66    |
| Plekhb1 | NM_001163184.1 | 2950.54 | 3272.23 | 2858.53  | 3767.51  |
| Plekhm1 | NM_183034.1    | 179.23  | 186.19  | 180.81   | 183.99   |
| Plip    | NM_026385.3    | 104.01  | 108.26  | 109.22   | 136.64   |
| Plp1    | NM_011123.2    | 7510.37 | 8361.27 | 7048.78  | 10492.31 |
| Plxdc2  | NM_026162.5    | 571.32  | 628.11  | 558.18   | 643.22   |
| Plxnb3  | NM_019587.2    | 93.62   | 95.74   | 88.18    | 125.89   |
| Pmp22   | NM_008885.2    | 137.03  | 135.23  | 161.62   | 237.62   |
| Pms2    | NM_008886.2    | 346.44  | 314.49  | 361.27   | 341.14   |
| Pnoc    | NM_001205075.1 | 30.31   | 34.84   | 40.43    | 34.04    |
| Pole    | NM_011132.2    | 22.76   | 20.29   | 26.06    | 22.78    |
| Ppfia4  | NM_001144855.1 | 180.27  | 186.92  | 184.78   | 211.55   |
| Ppp3ca  | NM_008913.4    | 17398.1 | 16471.4 | 16999.08 | 16581.47 |
| Ppp3cb  | NM_008914.2    | 4673.98 | 4437.67 | 4583.92  | 4400.05  |
| Ppp3r1  | NM_024459.2    | 6799.72 | 6423.3  | 7007.16  | 6316.67  |
| Ppp3r2  | NM_001004025.4 | 21.56   | 21.89   | 14.98    | 17.55    |
| Prdx1   | NM_011034.4    | 211.15  | 216.15  | 225      | 230.63   |
| Prf1    | NM_011073.2    | 13.54   | 14.74   | 11.64    | 9.75     |
| Prkaca  | NM_008854.3    | 3602.36 | 3436.49 | 3621.93  | 3513.93  |
| Prkacb  | NM_011100.3    | 4937.63 | 4768.31 | 4958.53  | 4829.6   |
| Prkar1a | NM_021880.2    | 6831.16 | 6731.84 | 7325.2   | 7356.16  |
| Prkar2a | NM_008924.2    | 755.7   | 737.63  | 743.6    | 759.83   |
| Prkar2b | NM_011158.3    | 1130.97 | 1160.6  | 978.58   | 1144.46  |
| Prkce   | NM_011104.2    | 4482.92 | 4382.63 | 4559.37  | 4585.63  |
| Prkcq   | NM_008859.2    | 73.62   | 81.38   | 64.99    | 90.3     |
| Prkdc   | NM_011159.2    | 195.65  | 203.19  | 179.27   | 188.08   |
| Pros1   | NM_011173.2    | 85.57   | 90.79   | 81.67    | 106.99   |
| Psen2   | NM_001128605.1 | 121.93  | 128.46  | 126.28   | 126.78   |

|         |                |         |         |         |         |
|---------|----------------|---------|---------|---------|---------|
| Psm8    | NM_010724.2    | 65.68   | 82.3    | 88.69   | 123.81  |
| Pten    | NM_008960.2    | 3112.44 | 3046.99 | 3164.15 | 2991.36 |
| Ptger3  | NM_011196.2    | 19.33   | 24.18   | 23.83   | 22.42   |
| Ptger4  | NM_008965.1    | 17.27   | 19.36   | 13.93   | 18.2    |
| Ptgs2   | NM_011198.3    | 173.67  | 198.02  | 144.62  | 145.89  |
| Ptms    | NM_026988.2    | 6290.75 | 5937.82 | 6199.23 | 6746.9  |
| Ptpn6   | NM_013545.2    | 41.9    | 45.46   | 49.14   | 61.79   |
| Ptprc   | NM_011210.3    | 38.38   | 45.33   | 48.03   | 66.07   |
| Pttg1   | NM_001131054.1 | 708.24  | 707.43  | 776.35  | 688.9   |
| Ptx3    | NM_008987.3    | 15.95   | 17.58   | 11.37   | 18.37   |
| Pycard  | NM_023258.4    | 15.14   | 13.2    | 10.11   | 11.88   |
| Rab6b   | NM_173781.4    | 5463.71 | 5235.25 | 5374.02 | 5148.05 |
| Rab7    | NM_009005.2    | 4293.44 | 4053.05 | 4359.43 | 4221.46 |
| Rac1    | NM_009007.2    | 3440.64 | 3631.58 | 3579.85 | 3584.02 |
| Rac2    | NM_009008.3    | 24.48   | 27.66   | 27.27   | 21.02   |
| Rad1    | NM_011232.2    | 201.63  | 195.92  | 196.41  | 185.44  |
| Rad17   | NM_001044371.1 | 138.93  | 135.84  | 136.89  | 147.66  |
| Rad50   | NM_009012.2    | 140.77  | 140.13  | 149.26  | 139.61  |
| Rad51   | NM_011234.4    | 23.26   | 27.68   | 28.54   | 22      |
| Rad51b  | NM_009014.3    | 14.34   | 15.38   | 15.49   | 11.72   |
| Rad51c  | NM_053269.3    | 43.79   | 47.34   | 49.29   | 48.63   |
| Rad9a   | NM_011237.2    | 51.36   | 55.03   | 47.52   | 61.44   |
| Rag1    | NM_009019.2    | 13.54   | 14.03   | 12      | 11.29   |
| Rala    | NM_019491.5    | 789.9   | 839.03  | 754.82  | 754.51  |
| Ralb    | NM_022327.5    | 291.79  | 293.58  | 282.27  | 301.04  |
| Rapgef3 | NM_001177810.1 | 190.38  | 190.42  | 185.91  | 230.35  |
| Rb1cc1  | NM_009826.4    | 1256.03 | 1233.83 | 1272.04 | 1174.33 |
| Rbfox3  | NM_001024931.2 | 3679.49 | 3259.85 | 3592.79 | 3360.14 |
| Rela    | NM_009045.4    | 122.7   | 127.45  | 121.26  | 136.79  |
| Relb    | NM_009046.2    | 102.82  | 106.83  | 108.78  | 110.16  |
| Reln    | NM_011261.2    | 309.68  | 333.69  | 319.12  | 355.53  |
| Rgl1    | NM_016846.3    | 372.86  | 406.11  | 370.92  | 428.53  |
| Rhoa    | NM_016802.4    | 1565.41 | 1579.89 | 1718.84 | 1845.69 |
| Ripk1   | NM_009068.3    | 28.99   | 33.4    | 28.91   | 29.24   |
| Ripk2   | NM_138952.3    | 90.81   | 80.15   | 82.68   | 90.48   |
| Rnf8    | NM_021419.2    | 387.92  | 358.52  | 371.07  | 382.46  |
| Rpa1    | NM_026653.2    | 512.98  | 514.28  | 527.36  | 529.3   |
| Rpl28   | NM_009081.2    | 3841.13 | 4031.6  | 3891.92 | 4171.54 |
| Rpl29   | NM_009082.2    | 2441.82 | 2599.74 | 2516.35 | 2514.67 |
| Rpl36al | NM_025589.4    | 898.16  | 972.39  | 946.04  | 931.67  |
| Rpl9    | NM_011292.2    | 3730.32 | 3894.23 | 3781.84 | 3883.62 |

|           |                |         |          |          |          |
|-----------|----------------|---------|----------|----------|----------|
| Rps10     | NM_025963.3    | 850.86  | 880.73   | 853.78   | 1007.31  |
| Rps2      | NM_008503.5    | 3279.01 | 3281.32  | 3228.29  | 3552.23  |
| Rps21     | NM_025587.2    | 10013   | 10259.26 | 10572.64 | 11294.43 |
| Rps3      | NM_012052.2    | 226.79  | 220.89   | 232.11   | 207.35   |
| Rps9      | NM_029767.2    | 3237.48 | 3600.83  | 3327.53  | 3808     |
| Rrm2      | NM_009104.1    | 16.81   | 20.44    | 17.03    | 17.58    |
| Rsad2     | NM_021384.2    | 45.91   | 55.39    | 55.45    | 64.17    |
| Rtn4r1    | NM_177708.4    | 516.72  | 508.92   | 572.75   | 528.69   |
| S100a10   | NM_009112.2    | 918.47  | 951.44   | 929.57   | 975.03   |
| S100b     | NM_009115.3    | 1023.53 | 1086.7   | 1174.11  | 1270.53  |
| S1pr3     | NM_010101.3    | 117.88  | 124.87   | 104.33   | 136.08   |
| S1pr4     | NM_010102.2    | 13.54   | 13.13    | 10.11    | 10.93    |
| S1pr5     | NM_053190.2    | 59.7    | 64.79    | 68.13    | 81.53    |
| Sall1     | NM_021390.3    | 276.63  | 311.92   | 282.23   | 326.98   |
| Sell      | XM_006496716.1 | 13.93   | 13.47    | 13.49    | 11.03    |
| Serpina3n | NM_009252.2    | 47.78   | 74.55    | 60.01    | 120.37   |
| Serpine1  | NM_008871.2    | 15.53   | 20.88    | 17.1     | 22.56    |
| Serpinf1  | NM_011340.3    | 86.6    | 116.3    | 86.49    | 122.52   |
| Serping1  | NM_009776.3    | 26.88   | 48.68    | 35.61    | 56.39    |
| Sesn1     | NM_001013370.2 | 556.95  | 599.04   | 627.18   | 572.99   |
| Sesn2     | NM_144907.1    | 79.18   | 70.77    | 84.3     | 82.14    |
| Setd1a    | NM_178029.3    | 165.64  | 151.58   | 149.95   | 167.5    |
| Setd1b    | NM_001040398.1 | 516.95  | 501.95   | 498.65   | 512.54   |
| Setd2     | NM_001081340.2 | 1196.43 | 1137.27  | 1129.16  | 1142.33  |
| Setd7     | NM_080793.5    | 517.79  | 475.85   | 488.66   | 501      |
| Setdb1    | NM_018877.2    | 133.61  | 133.3    | 108.39   | 139.91   |
| Sftpd     | NM_009160.2    | 19.83   | 22.87    | 19.72    | 16.69    |
| Sh2d1a    | NR_132588.1    | 13.54   | 13.13    | 10.11    | 9.6      |
| Shank3    | NM_021423.3    | 854.66  | 792.53   | 779.73   | 787.31   |
| Siglec1   | NM_011426.3    | 14.15   | 11.72    | 12.53    | 9.5      |
| Siglecf   | NM_145581.1    | 14.2    | 13.69    | 16.75    | 17.28    |
| Sin3a     | NM_001110350.1 | 453.04  | 452.34   | 434.12   | 434.64   |
| Sirt1     | NM_019812.2    | 263.06  | 264.15   | 228.86   | 250.22   |
| Slamf8    | NM_029084.3    | 14.23   | 13.84    | 13.46    | 14.94    |
| Slamf9    | NM_029612.4    | 26.9    | 32.84    | 41.05    | 48.63    |
| Slc10a6   | NM_029415.2    | 13.72   | 16.91    | 13.24    | 15.88    |
| Slc17a6   | NM_080853.3    | 478.16  | 506.79   | 469.1    | 482.84   |
| Slc17a7   | NM_182993.2    | 7911.62 | 7519.13  | 8764.67  | 8176.93  |
| Slc1a3    | NM_148938.3    | 4378.56 | 4941.89  | 4611.41  | 4943.55  |
| Slc2a1    | NM_011400.3    | 190.14  | 177.68   | 185.32   | 234.37   |
| Slc2a5    | NM_019741.3    | 57.42   | 62.67    | 64.93    | 78.72    |

|         |                |          |          |          |          |
|---------|----------------|----------|----------|----------|----------|
| Slc44a1 | NM_001159633.1 | 888.75   | 917.44   | 905.94   | 1037.87  |
| Slc6a1  | NM_178703.4    | 2300.28  | 2153.25  | 2530.72  | 2473.91  |
| Slco2b1 | NM_175316.3    | 95.07    | 98.43    | 93.79    | 112.24   |
| Slfn8   | NM_181545.4    | 27.98    | 28.44    | 24.25    | 31.82    |
| Smarca4 | NM_011417.2    | 1113.47  | 1046.24  | 1009.02  | 978.63   |
| Smarca5 | NM_053124.2    | 1612.17  | 1684.2   | 1627.02  | 1608.68  |
| Smarcd1 | NM_031842.1    | 570.5    | 553.1    | 566.35   | 638      |
| Smc1a   | NM_019710.2    | 608.84   | 607.21   | 590.61   | 593.54   |
| Snca    | NM_009221.2    | 2112.43  | 2282.76  | 2154.9   | 2110.5   |
| Socs3   | NM_007707.2    | 36.55    | 32.54    | 32.05    | 37.07    |
| Sod2    | NM_013671.3    | 3044.73  | 3008.13  | 3167.05  | 2918.12  |
| Sox10   | XM_128139.6    | 137.19   | 150.27   | 133.36   | 183.1    |
| Sox4    | NM_009238.2    | 162.8    | 173.29   | 126.02   | 139.85   |
| Sox9    | NM_011448.4    | 414.83   | 429.66   | 400.97   | 474.38   |
| Sphk1   | NM_011451.3    | 19.03    | 18.61    | 18.33    | 15.39    |
| Spib    | NM_019866.1    | 15.49    | 16.34    | 13.78    | 11.4     |
| Spint1  | NM_016907.3    | 22.66    | 17.2     | 14.4     | 26.53    |
| Spp1    | NM_009263.3    | 111.42   | 211.54   | 135.96   | 275.84   |
| Sqstm1  | NM_011018.2    | 2381.07  | 2345.26  | 2552.25  | 2557.76  |
| Srgn    | NM_011157.2    | 93.79    | 109.64   | 101.49   | 139.91   |
| Srxn1   | NM_029688.4    | 858.6    | 790.02   | 850.69   | 901.27   |
| St3gal6 | NM_018784.2    | 207.26   | 207.38   | 202.58   | 206.38   |
| St8sia6 | NM_145838.1    | 26.18    | 31.84    | 30.46    | 43.22    |
| Stat1   | NM_009283.3    | 156.79   | 162.27   | 185.36   | 207.89   |
| Steap4  | NM_054098.3    | 13.89    | 14       | 11.42    | 12.29    |
| Stmn1   | NM_019641.3    | 14621.46 | 15052.89 | 14651.65 | 13419.06 |
| Stx18   | NM_026959.2    | 113.84   | 114.18   | 115.75   | 110.14   |
| Sumo1   | NM_009460.1    | 3484.11  | 3401.54  | 3626.05  | 3447.94  |
| Suv39h1 | NM_011514.2    | 370.25   | 386.75   | 390.52   | 385.74   |
| Suv39h2 | NM_022724.4    | 96.72    | 91.57    | 77.35    | 82.52    |
| Suz12   | NM_199196.1    | 818.98   | 826.96   | 817.36   | 845.63   |
| Syk     | NM_001198977.1 | 39.18    | 45.66    | 41.71    | 41.48    |
| Syn2    | NM_013681.1    | 4525.48  | 4703.75  | 4757.62  | 4899.56  |
| Syp     | NM_009305.2    | 8499.62  | 8396.7   | 9485.9   | 9104.95  |
| Tarbp2  | NM_001253795.1 | 144.8    | 138.76   | 127.61   | 145.85   |
| Tbc1d4  | NM_001081278.2 | 59.12    | 64.94    | 54.95    | 63.46    |
| Tbr1    | NM_009322.3    | 738.14   | 644.06   | 712.24   | 635.27   |
| Tbx21   | NM_019507.2    | 13.54    | 11.72    | 10.11    | 9.5      |
| Tcirg1  | NM_001136091.1 | 52.29    | 64.08    | 58.15    | 73.08    |
| Tcl1    | NM_009337.3    | 13.54    | 11.72    | 10.11    | 9.5      |
| Tet1    | NM_027384.1    | 215.66   | 216.58   | 190.19   | 193.14   |

|           |                |         |         |         |         |
|-----------|----------------|---------|---------|---------|---------|
| Tfg       | NM_001252443.1 | 1272.49 | 1257.72 | 1238.05 | 1211.43 |
| Tgfa      | NM_031199.2    | 259.77  | 278.5   | 207.22  | 359.65  |
| Tgfb1     | NM_011577.1    | 60.02   | 68.43   | 59.91   | 78.25   |
| Tgibr1    | NM_009370.2    | 387.22  | 429.17  | 401.83  | 448.48  |
| Tgm1      | NM_001161714.1 | 13.54   | 14.64   | 10.49   | 11.75   |
| Tgm2      | NM_009373.3    | 48.85   | 48.63   | 52.11   | 64.8    |
| Tie1      | NM_011587.2    | 58.19   | 45.08   | 40.59   | 49.58   |
| Timeless  | NM_011589.1    | 55.42   | 51.56   | 53.84   | 53.62   |
| Timp1     | NM_011593.2    | 13.54   | 13.13   | 10.11   | 10.56   |
| Tle3      | NM_009389.2    | 285.77  | 298.06  | 315.52  | 318.42  |
| Tlr2      | NM_011905.2    | 13.54   | 15.67   | 12.83   | 16.21   |
| Tlr4      | NM_021297.2    | 32.32   | 36.43   | 30.42   | 37.15   |
| Tlr7      | NM_133211.3    | 21.61   | 26.3    | 23.58   | 28.53   |
| Tm4sf1    | NM_008536.3    | 120.86  | 132.7   | 111.45  | 150.34  |
| Tmc7      | NM_172476.4    | 102.3   | 91.29   | 91.11   | 94.01   |
| Tmcc3     | NM_172051.2    | 324.7   | 370.26  | 334.38  | 414.27  |
| Tmem100   | NM_026433.2    | 167.56  | 174.31  | 149.87  | 172.66  |
| Tmem119   | NM_146162.2    | 259.47  | 287.56  | 289.35  | 333.88  |
| Tmem144   | NM_027495.4    | 117.16  | 117.64  | 120.4   | 134.19  |
| Tmem173   | NM_028261.1    | 21.77   | 25.34   | 17.01   | 23.74   |
| Tmem204   | NM_001001183.1 | 38.07   | 31.59   | 33.42   | 35.95   |
| Tmem206   | NM_025864.3    | 172.67  | 185.22  | 170.48  | 174.36  |
| Tmem37    | NM_019432.2    | 24.29   | 24.68   | 31.33   | 27.65   |
| Tmem64    | NM_181401.3    | 1126.74 | 1159.56 | 1036.2  | 1009.95 |
| Tmem88b   | NM_001033394.3 | 220.27  | 228.39  | 213.31  | 281.15  |
| Tnf       | NM_013693.2    | 13.54   | 13.78   | 10.11   | 9.63    |
| Tnfrsf10b | NM_020275.3    | 16.48   | 15.18   | 15.8    | 15.25   |
| Tnfrsf11b | NM_008764.3    | 23.07   | 26.85   | 22.41   | 20.84   |
| Tnfrsf12a | NM_001161746.1 | 95.6    | 86.23   | 83.11   | 77.84   |
| Tnfrsf13c | NM_028075.2    | 15.31   | 18.57   | 13.54   | 14.52   |
| Tnfrsf17  | NM_011608.1    | 15.81   | 17.59   | 20.68   | 18.56   |
| Tnfrsf1a  | NM_011609.2    | 88.4    | 103.41  | 97.04   | 123.97  |
| Tnfrsf1b  | NM_011610.3    | 22.76   | 32.04   | 25.17   | 30.02   |
| Tnfrsf25  | NM_033042.3    | 36.7    | 26.99   | 16.87   | 19.66   |
| Tnfrsf4   | NM_011659.2    | 13.54   | 11.95   | 10.11   | 9.94    |
| Tnfsf10   | NM_009425.2    | 32.25   | 23.15   | 27.75   | 33.24   |
| Tnfsf12   | NM_011614.3    | 76.36   | 83.37   | 79.78   | 92.42   |
| Tnfsf13b  | NM_033622.1    | 17.37   | 16.97   | 16.57   | 22.42   |
| Tnfsf4    | NM_009452.2    | 13.54   | 12.74   | 10.11   | 9.83    |
| Tnfsf8    | NM_009403.2    | 14.02   | 13.13   | 11.69   | 10.27   |
| Top2a     | NM_011623.2    | 21.75   | 23.73   | 19.83   | 18.69   |

|          |                |         |         |         |         |
|----------|----------------|---------|---------|---------|---------|
| Topbp1   | NM_176979.5    | 93.07   | 100.67  | 100.65  | 97.34   |
| Tpd52    | NM_001025262.1 | 1731.27 | 1669.28 | 1845.51 | 1753.17 |
| Tpsb2    | NM_010781.3    | 13.93   | 11.72   | 10.12   | 10.45   |
| Tradd    | NM_001033161.2 | 36.18   | 34.22   | 32.01   | 37.29   |
| Traf1    | NM_009421.3    | 20.35   | 26.24   | 17.91   | 21.86   |
| Traf2    | NM_009422.2    | 165.25  | 165.51  | 152.87  | 163.19  |
| Traf3    | NM_011632.3    | 254.66  | 273.74  | 237.69  | 229.93  |
| Traf6    | NM_009424.2    | 178.39  | 177.15  | 175.81  | 188.53  |
| Trat1    | NM_198297.3    | 18.14   | 19.13   | 14.69   | 19.88   |
| Trem1    | NM_021406.5    | 13.54   | 13.87   | 11.09   | 10.76   |
| Trem2    | NM_031254.2    | 172.62  | 200.45  | 224.29  | 306.97  |
| Trem3    | NM_021407.3    | 14.26   | 12.43   | 12.52   | 10.46   |
| Trim47   | NM_001205081.1 | 67.84   | 61.7    | 56.97   | 71.95   |
| Trp53    | NM_011640.1    | 102.63  | 105.41  | 95.63   | 109.45  |
| Trp53bp2 | NM_173378.2    | 147.53  | 153.66  | 150.55  | 175.27  |
| Trp73    | NM_011642.3    | 14.21   | 20.14   | 13.5    | 16.09   |
| Trpa1    | NM_177781.4    | 14.09   | 13.64   | 11.52   | 11.78   |
| Trpm4    | NM_175130.4    | 61.1    | 45.06   | 56.31   | 53.35   |
| Tspan18  | NM_183180.2    | 16.99   | 22.97   | 18.21   | 25.55   |
| Ttr      | NM_013697.4    | 69.97   | 75.27   | 46.74   | 134.56  |
| Tubb3    | NM_023279.2    | 4087.71 | 4112.69 | 4188.44 | 4194.37 |
| Tubb4a   | NM_009451.3    | 1453.82 | 1415.55 | 1491.16 | 1612.84 |
| Txnrd1   | NM_015762.2    | 770.43  | 757.16  | 740.56  | 805.28  |
| Tyrobp   | NM_011662.2    | 295.77  | 376.82  | 381.28  | 523.14  |
| Ugt8a    | NM_011674.4    | 346.68  | 355.05  | 290.23  | 371.58  |
| Ulk1     | NM_009469.3    | 910.9   | 864.2   | 925.31  | 866.58  |
| Ung      | NM_001040691.1 | 37.72   | 46.56   | 39.17   | 35.95   |
| Uty      | NM_009484.2    | 262.41  | 264.43  | 240.95  | 235.48  |
| Vamp7    | NM_011515.4    | 1082.67 | 1101.49 | 1167.18 | 1091.3  |
| Vav1     | NM_011691.4    | 67.03   | 72.56   | 69.62   | 86.71   |
| Vegfa    | NM_001025250.3 | 478.51  | 405.28  | 387.67  | 459.74  |
| Vim      | NM_011701.4    | 141.27  | 284.92  | 161.69  | 436.52  |
| Vps4a    | NM_126165.1    | 979.32  | 1001.43 | 980.28  | 1003.67 |
| Vps4b    | NM_009190.2    | 230.35  | 227.19  | 247.55  | 233.97  |
| Was      | NM_009515.2    | 18.85   | 15.06   | 16.12   | 19.39   |
| Wdr5     | NM_080848.2    | 150.12  | 162.47  | 148.21  | 152.14  |
| Xcl1     | NM_008510.1    | 14.18   | 12.74   | 14.94   | 14.99   |
| Xiap     | NM_009688.2    | 2154.33 | 2173.37 | 2106.69 | 2178.4  |
| Xrcc6    | NM_010247.2    | 132.73  | 133.61  | 123.05  | 129.28  |
| Zbp1     | NM_021394.2    | 13.84   | 15.89   | 14.36   | 15.61   |

**Table S3. The average transcription counts for each group after normalization with housekeeping genes in the ipsilateral hippocampus.**

| mRNA     | Accession #    | Y/Sham  | Y/TBI   | O/Sham  | O/TBI   |
|----------|----------------|---------|---------|---------|---------|
| Abcc3    | NM_029600.3    | 26.72   | 35.02   | 34.68   | 43.59   |
| Abcc8    | NM_011510.3    | 58.96   | 52.73   | 56.68   | 49.13   |
| Abl1     | NM_009594.4    | 248.38  | 263.55  | 235.67  | 236.33  |
| Adamts16 | NM_172053.2    | 20.69   | 25.76   | 16.07   | 16.38   |
| Ago4     | NM_153177.3    | 52.88   | 54.55   | 38.99   | 35.12   |
| Agt      | NM_007428.3    | 217.62  | 282.92  | 136.36  | 184.04  |
| Al464131 | NM_001085515.2 | 231.81  | 259.86  | 231.57  | 229.88  |
| Ak1      | NM_001198790.1 | 1330.95 | 1360.14 | 1387.72 | 1265.06 |
| Akt1     | NM_001165894.1 | 904.8   | 892.77  | 907.68  | 840.72  |
| Akt2     | NM_001110208.1 | 292.23  | 276.22  | 300.29  | 266.4   |
| Aldh11l1 | NM_027406.1    | 463.07  | 570.52  | 493.72  | 513.22  |
| Ambra1   | NM_001080754.1 | 878.68  | 859.92  | 815.37  | 789.33  |
| Amigo2   | NM_178114.4    | 444.59  | 424.66  | 430.66  | 484.01  |
| Anapc15  | NM_027532.3    | 205.26  | 226.94  | 210.5   | 216.54  |
| Anxa1    | NM_010730.2    | 42.25   | 44.85   | 35.53   | 40.91   |
| Apc      | NM_007462.3    | 3818.28 | 4120.46 | 3850.84 | 3716.37 |
| Apex1    | NM_009687.2    | 266.02  | 300.91  | 288.69  | 292.68  |
| Apoe     | NM_001305844.1 | 6600.8  | 8254.36 | 7177.29 | 8853.14 |
| Arc      | NM_018790.2    | 737.9   | 463.96  | 359.1   | 371.26  |
| Arhgap24 | NM_029270.2    | 98.73   | 91.02   | 69.74   | 79.14   |
| Arid1a   | NM_001080819.1 | 514.1   | 500.65  | 496.89  | 480.4   |
| Asb2     | NM_023049.1    | 18.9    | 15.71   | 16.33   | 18.2    |
| Ash2l    | NM_001080793.1 | 404.36  | 384.93  | 391.12  | 384.46  |
| Asph     | NM_001177849.1 | 2872.55 | 2970.81 | 3031.95 | 2983.54 |
| Atf3     | NM_007498.3    | 16.44   | 19.74   | 17.77   | 22.11   |
| Atg14    | NM_172599.4    | 266.91  | 264.56  | 259.64  | 253.96  |
| Atg3     | NM_026402.3    | 1511.13 | 1537.08 | 1514.41 | 1466.5  |
| Atg5     | NM_001314013.1 | 583.26  | 648.3   | 570.09  | 559.16  |
| Atg7     | NM_028835.1    | 229.25  | 225.33  | 231.94  | 239.47  |
| Atg9a    | NM_001003917.3 | 1201.13 | 1197.31 | 1213.14 | 1114.7  |
| Atm      | NM_007499.2    | 250.61  | 259.32  | 263.09  | 260.3   |
| Atp6v0e  | NM_025272.2    | 212.32  | 280.06  | 232.97  | 252.62  |
| Atp6v1a  | NM_007508.5    | 5887.13 | 6281.17 | 6539.3  | 6185.58 |
| Atr      | NM_019864.1    | 123.58  | 145.79  | 133.61  | 124.68  |
| Axl      | NM_009465.3    | 319.72  | 362.83  | 325.75  | 354.58  |
| B3gnt5   | NM_001159407.1 | 15.18   | 20.87   | 18.56   | 18.99   |
| Bad      | NM_007522.3    | 388.12  | 413.25  | 394.62  | 368.74  |
| Bag3     | NM_013863.4    | 93.97   | 100.03  | 87.2    | 100.18  |

|         |                |         |         |         |         |
|---------|----------------|---------|---------|---------|---------|
| Bag4    | NM_026121.3    | 1207.69 | 1193.73 | 1227.31 | 1120.57 |
| Bak1    | NM_007523.2    | 203.38  | 199.45  | 198.35  | 209.55  |
| Bard1   | NM_007525.3    | 25.65   | 20.24   | 16.11   | 20.62   |
| Bax     | NM_007527.3    | 198.23  | 206.43  | 206.5   | 190.1   |
| Bbc3    | NM_133234.1    | 58.72   | 47.69   | 44.19   | 50.4    |
| Bcas1   | NM_029815.2    | 1543.93 | 1795.6  | 1510.41 | 1628.77 |
| Bcl10   | NM_009740.1    | 281.23  | 299.09  | 286.6   | 282.57  |
| Bcl2    | NM_009741.3    | 90.65   | 100.11  | 77.56   | 81.17   |
| Bcl2a1a | NM_009742.3    | 52.12   | 77.89   | 84.73   | 128.03  |
| Bcl2l1  | NM_009743.4    | 710.19  | 733.02  | 713.52  | 710.96  |
| Bcl2l11 | NM_001284410.1 | 34      | 32.97   | 32.14   | 35.28   |
| Bcl2l2  | NM_007537.1    | 1429.72 | 1441.53 | 1421.08 | 1347.61 |
| Bdnf    | NM_007540.4    | 401.36  | 329.23  | 414.64  | 357.59  |
| Becn1   | NM_019584.3    | 1761.66 | 1733.19 | 1741.41 | 1709.54 |
| Bid     | NM_007544.3    | 176.63  | 186.31  | 172.11  | 176.12  |
| Bik     | NM_007546.2    | 11.49   | 11.17   | 10.99   | 12.77   |
| Bin1    | NM_001083334.1 | 1676.69 | 1784.47 | 1714.78 | 1737.76 |
| Birc2   | NM_007465.2    | 473.08  | 516.67  | 478.91  | 447.63  |
| Birc3   | NM_007464.3    | 16.41   | 20.73   | 17.72   | 19.48   |
| Birc5   | NM_009689.2    | 27.52   | 22.21   | 20.11   | 22.35   |
| Blk     | NM_007549.2    | 16.13   | 11.52   | 15.98   | 16.41   |
| Blm     | NM_001042527.2 | 44.39   | 40.8    | 47.39   | 42.74   |
| Blnk    | NM_008528.4    | 59.45   | 69.33   | 82.15   | 84.57   |
| Bmi1    | NM_007552.4    | 565.53  | 573.64  | 585.21  | 570.17  |
| Bnip3   | NM_009760.4    | 1989.96 | 2103.78 | 2097.21 | 2079.87 |
| Bnip3l  | NM_009761.3    | 1344.09 | 1508.44 | 1372.86 | 1370.46 |
| Bok     | NM_016778.2    | 593.66  | 536.6   | 660.12  | 584.95  |
| Bola2   | NM_175103.3    | 1520.33 | 1521.88 | 1483.14 | 1522.58 |
| Braf    | NM_139294.5    | 1164.63 | 1186.35 | 1260.98 | 1209.44 |
| Brca1   | NM_009764.3    | 11.69   | 12.68   | 10.08   | 13.03   |
| Brd2    | NM_010238.3    | 1407.08 | 1393.29 | 1414.94 | 1413.66 |
| Brd3    | NM_001113573.1 | 393.83  | 414.46  | 381.47  | 373.45  |
| Brd4    | NM_001286630.1 | 659.4   | 614.26  | 626.14  | 582.18  |
| Btk     | NM_013482.2    | 34.65   | 29.29   | 33.28   | 37.41   |
| C1qa    | NM_007572.2    | 593.23  | 845.73  | 912.75  | 1253.57 |
| C1qb    | NM_009777.2    | 958.01  | 1325.67 | 1381.69 | 1816.46 |
| C1qc    | NM_007574.2    | 896.28  | 1288.49 | 1357.16 | 1707.8  |
| C3      | XM_011246258.1 | 41.69   | 83.12   | 81.33   | 174.8   |
| C3ar1   | NM_009779.2    | 51.37   | 79.16   | 78.39   | 107.9   |
| C4a     | NM_011413.2    | 332.93  | 969.43  | 1135.46 | 1833.68 |
| C5ar1   | NM_007577.3    | 26.46   | 34.11   | 29.24   | 37.11   |



|          |                |         |         |         |         |
|----------|----------------|---------|---------|---------|---------|
| C6       | NM_016704.2    | 9.92    | 9.98    | 9.25    | 11.98   |
| Cables1  | NM_001146287.1 | 358.16  | 446.04  | 406.47  | 392.41  |
| Calcoco2 | NM_001271018.1 | 12.11   | 10.02   | 12.28   | 12.93   |
| Calr     | NM_007591.3    | 6949.05 | 6919.78 | 6293.44 | 6626.16 |
| Camk4    | NM_009793.3    | 981.82  | 849.82  | 1002.03 | 876.73  |
| Casp1    | NM_009807.2    | 49.19   | 56.86   | 71.47   | 74.14   |
| Casp2    | NM_007610.1    | 163.35  | 163     | 145.15  | 137.35  |
| Casp3    | NM_009810.2    | 123.87  | 133.07  | 111.19  | 120.65  |
| Casp4    | NM_007609.2    | 17.54   | 23.55   | 21.81   | 31.1    |
| Casp6    | NM_009811.3    | 67.5    | 73.56   | 66.46   | 73.29   |
| Casp7    | NM_007611.2    | 48.21   | 44.51   | 47.85   | 47.36   |
| Casp8    | NM_009812.2    | 53.92   | 57.81   | 51.4    | 60.45   |
| Casp9    | NM_015733.4    | 146.58  | 157.36  | 168.62  | 157.38  |
| Cass4    | NM_001080820.2 | 11.94   | 12.83   | 12.81   | 12.07   |
| Ccl2     | NM_011333.3    | 14      | 26.89   | 24.12   | 34.51   |
| Ccl3     | NM_011337.1    | 16.7    | 26.55   | 27.32   | 35.39   |
| Ccl4     | NM_013652.1    | 13.41   | 14.1    | 14.11   | 15.19   |
| Ccl5     | NM_013653.1    | 10.25   | 15.02   | 16.2    | 23.74   |
| Ccl7     | NM_013654.3    | 12.21   | 14.24   | 11.8    | 13.3    |
| Ccng2    | NM_007635.4    | 636.8   | 560.96  | 610.2   | 530.45  |
| Ccni     | NM_017367.3    | 2315.19 | 2351.17 | 2231    | 2156.66 |
| Ccr2     | NM_009915.2    | 21.68   | 19.42   | 16.79   | 16.8    |
| Ccr5     | NM_009917.5    | 50.69   | 51.64   | 48.07   | 51.87   |
| Cd109    | NM_153098.3    | 94.3    | 109.03  | 104.34  | 110.14  |
| Cd14     | NM_009841.3    | 24.51   | 30.47   | 36.57   | 45.46   |
| Cd163    | NM_053094.2    | 26.03   | 34.73   | 30.85   | 31.29   |
| Cd19     | NM_009844.2    | 11.51   | 10.77   | 9.25    | 11.98   |
| Cd209e   | NM_130905.2    | 11.54   | 12.4    | 10.05   | 12.88   |
| Cd244    | NM_018729.2    | 11.78   | 14.54   | 11.78   | 16.07   |
| Cd24a    | NM_009846.2    | 162.8   | 159.38  | 123.23  | 143.51  |
| Cd300lf  | NM_001169153.1 | 14.12   | 15.16   | 12.29   | 14.92   |
| Cd33     | NM_001111058.1 | 59.06   | 64.22   | 73.27   | 80.19   |
| Cd36     | NM_007643.3    | 37.1    | 45.55   | 39.46   | 42.92   |
| Cd3d     | NM_013487.2    | 10.58   | 10.73   | 11.42   | 13.05   |
| Cd3e     | NM_007648.4    | 13.67   | 16.16   | 16.44   | 15.87   |
| Cd3g     | NM_009850.2    | 12.21   | 14.54   | 16.67   | 16.9    |
| Cd40     | NM_011611.2    | 21.25   | 19.75   | 21.28   | 22.1    |
| Cd44     | NM_009851.2    | 27.12   | 20.38   | 22.7    | 20.48   |
| Cd47     | NM_010581.3    | 1933.92 | 1805.07 | 1891.64 | 1752.69 |
| Cd6      | NM_001037801.2 | 15.02   | 17.1    | 18.07   | 18.03   |
| Cd68     | NM_009853.1    | 143.79  | 194.51  | 207.37  | 273.77  |

|         |                |         |          |         |         |
|---------|----------------|---------|----------|---------|---------|
| Cd69    | NM_001033122.3 | 14.54   | 11.97    | 15.57   | 16.84   |
| Cd70    | NM_011617.1    | 12.95   | 13.7     | 11.76   | 17.86   |
| Cd72    | NM_001110320.1 | 22.21   | 18.12    | 21.49   | 27.34   |
| Cd74    | NM_001042605.1 | 106.16  | 158.7    | 103.4   | 205.68  |
| Cd83    | NM_009856.2    | 288.64  | 270.16   | 294.6   | 248.53  |
| Cd84    | NM_013489.2    | 72.04   | 84.17    | 104.14  | 138.13  |
| Cd86    | NM_019388.3    | 41.21   | 44.37    | 46.75   | 56.31   |
| Cd8a    | NM_001081110.2 | 9.92    | 10.12    | 9.69    | 12.26   |
| Cd8b1   | NM_009858.2    | 13.45   | 11.51    | 10.84   | 13.67   |
| Cdc25a  | NM_007658.3    | 118.28  | 125.41   | 106.25  | 106.93  |
| Cdc7    | NM_001271566.1 | 99.01   | 101.21   | 89.55   | 80.91   |
| Cdk20   | NM_053180.2    | 92.25   | 99.84    | 72.35   | 71.17   |
| Cdkn1a  | NM_007669.4    | 68.95   | 62.87    | 67.95   | 66.68   |
| Cdkn1c  | NM_009876.3    | 89.48   | 121.82   | 74      | 142.87  |
| Ceacam3 | NM_054059.1    | 11.38   | 12.63    | 12.12   | 13.7    |
| Cflar   | NM_207653.3    | 169.55  | 226.37   | 179.59  | 218     |
| Ch25h   | NM_009890.1    | 9.92    | 10.16    | 10.15   | 12.07   |
| Chek1   | NM_007691.5    | 23.95   | 19.64    | 22.84   | 23.49   |
| Chek2   | NM_016681.3    | 26.79   | 23.6     | 22.03   | 27.43   |
| Chn2    | NM_001163640.1 | 225.42  | 249.46   | 213.9   | 206.98  |
| Chst8   | NM_175140.4    | 191.32  | 222.03   | 215.37  | 227.25  |
| Chuk    | NM_001162410.1 | 562.96  | 621.95   | 535.78  | 513.63  |
| Cidea   | NM_007702.2    | 110.54  | 136.35   | 114.14  | 128.56  |
| Cideb   | NM_009894.3    | 60.6    | 62.75    | 59.76   | 54.99   |
| Cks1b   | NM_016904.1    | 48.2    | 48.16    | 46.95   | 50.44   |
| Clcf1   | NM_019952.3    | 11.97   | 10.88    | 10.92   | 13.61   |
| Cldn5   | NM_013805.4    | 364.95  | 316.66   | 196.08  | 174.25  |
| Clec7a  | NM_020008.2    | 12.89   | 26.41    | 34.06   | 54.95   |
| Clic4   | NM_013885.2    | 537.09  | 603.64   | 516.07  | 548.46  |
| Cln3    | NM_001146311.1 | 143.74  | 168.89   | 144.53  | 142.8   |
| Clstn1  | NM_023051.4    | 2559.4  | 2589.02  | 2767.99 | 2597.13 |
| Cnn2    | NM_007725.2    | 53.99   | 57.89    | 49.31   | 52.4    |
| Cnp     | NM_009923.2    | 5058.39 | 5887.03  | 5225.35 | 5677.81 |
| Cntnap2 | NM_001004357.2 | 532.66  | 530.39   | 528.59  | 486.73  |
| Coa5    | NM_198006.4    | 810.34  | 814.34   | 810.02  | 770.91  |
| Col6a3  | XM_897036.2    | 43.49   | 32.3     | 49.62   | 61.46   |
| Cotl1   | NM_028071.3    | 1069.75 | 1070.55  | 1089.27 | 1210.71 |
| Cox5b   | NM_009942.2    | 9654.64 | 10255.82 | 9929.24 | 9661.41 |
| Cp      | NM_001042611.1 | 201.43  | 292.48   | 191.08  | 272.24  |
| Cpa3    | NM_007753.2    | 17      | 13.35    | 13.07   | 13.38   |
| Creb1   | NM_001037726.1 | 352.67  | 371.7    | 342.04  | 339.74  |

|         |                |         |         |         |         |
|---------|----------------|---------|---------|---------|---------|
| Crebbp  | NM_001025432.1 | 2022.14 | 2047.43 | 1971.95 | 1832.93 |
| Crem    | NM_001110853.1 | 176.08  | 165.79  | 141.51  | 143.64  |
| Crip1   | NM_007763.3    | 185.1   | 231.55  | 171.15  | 178.21  |
| Cryba4  | NM_021351.1    | 25.41   | 21.93   | 26.36   | 28.76   |
| Csf1    | NM_001113530.1 | 338.27  | 398.36  | 345.89  | 411.29  |
| Csf1r   | NM_001037859.1 | 579.7   | 698.41  | 682.38  | 728.29  |
| Csf2rb  | NM_007780.4    | 32.6    | 31.27   | 36.92   | 31.15   |
| Csf3r   | NM_001252651.1 | 46.07   | 51.42   | 49.35   | 58.37   |
| Csk     | NM_007783.2    | 298.35  | 346.12  | 267.18  | 276.22  |
| Cst7    | NM_009977.3    | 12.05   | 12.88   | 11.3    | 13.67   |
| Ctse    | NM_007799.3    | 14.83   | 15.48   | 14.6    | 15.75   |
| Ctsf    | NM_019861.1    | 853.76  | 984.94  | 854.87  | 848.06  |
| Ctss    | NM_021281.2    | 934.74  | 1296.43 | 1465.18 | 1852.17 |
| Ctsw    | NM_009985.4    | 11.91   | 11.37   | 10.97   | 16.2    |
| Cx3cl1  | NM_009142.3    | 1006.6  | 850     | 971     | 874.16  |
| Cx3cr1  | NM_009987.3    | 655.23  | 761.75  | 812.79  | 905.25  |
| Cxcl10  | NM_021274.1    | 15.35   | 19.68   | 24.77   | 33.58   |
| Cxcl9   | NM_008599.2    | 11.59   | 15.6    | 10.44   | 17.11   |
| Cycs    | NM_007808.4    | 61.31   | 55.38   | 50.35   | 50.62   |
| Cyp27a1 | NM_024264.3    | 40.53   | 40.28   | 35.59   | 39.45   |
| Cyp7b1  | NM_007825.4    | 340.59  | 335.82  | 331.41  | 320.13  |
| Cytip   | NM_139200.4    | 18.87   | 12.68   | 12.41   | 16.35   |
| Dab2    | NM_023118.2    | 26.72   | 42.59   | 20.09   | 35.22   |
| Dapk1   | NM_134062.1    | 930.1   | 914.38  | 990.14  | 919.4   |
| Ddb2    | NM_028119.5    | 69.31   | 67.12   | 71.13   | 65.23   |
| Ddx58   | NM_172689.3    | 67.87   | 81.01   | 74.12   | 106.42  |
| Dicer1  | NM_148948.2    | 311.9   | 325.07  | 308.76  | 309.99  |
| Dlg1    | NM_001252433.1 | 878.54  | 887.38  | 862.41  | 818.06  |
| Dlg4    | NM_001109752.1 | 4577.58 | 4464.42 | 4534.01 | 4157.89 |
| Dlx1    | NM_010053.1    | 185.83  | 146.52  | 174.6   | 175.46  |
| Dlx2    | NM_010054.2    | 30.92   | 21.57   | 24.08   | 29.95   |
| Dna2    | NM_177372.3    | 32.29   | 19.8    | 26.85   | 25.81   |
| Dnmt1   | NM_010066.3    | 160.01  | 162.77  | 149.45  | 146.44  |
| Dnmt3a  | NM_007872.4    | 149.89  | 143.9   | 127.65  | 129.74  |
| Dnmt3b  | NM_001003960.3 | 11.57   | 12.04   | 10.31   | 12.87   |
| Dock1   | NM_001033420.2 | 265.17  | 296.21  | 253.45  | 278.69  |
| Dock2   | NM_033374.3    | 94.17   | 103.55  | 110.72  | 128.15  |
| Dot1l   | NM_199322.1    | 122.25  | 116.25  | 116.37  | 105.34  |
| Dst     | NM_010081.2    | 759.9   | 806.21  | 736.77  | 731.47  |
| Duoxa1  | NM_145395.2    | 11.26   | 11.38   | 9.96    | 12.46   |
| Dusp7   | NM_153459.4    | 1277.4  | 1198.62 | 1255.16 | 1166.11 |

|        |                |         |         |         |         |
|--------|----------------|---------|---------|---------|---------|
| E2f1   | NM_007891.4    | 49.86   | 44.83   | 48.81   | 48.33   |
| Eed    | NM_021876.3    | 422.7   | 454.4   | 386.36  | 407.49  |
| Eef2k  | NM_007908.3    | 220.45  | 226.06  | 226.32  | 212.32  |
| Egfr   | NM_207655.2    | 92.33   | 117.75  | 80.31   | 90.81   |
| Egr1   | NM_007913.5    | 2111.03 | 1442.54 | 1404.7  | 1255.99 |
| Ehmt2  | NM_145830.1    | 2123.2  | 2110.19 | 2095.27 | 1919.78 |
| Eif1   | NM_011508.1    | 4718.43 | 4663.89 | 4592.14 | 4352.89 |
| Emcn   | NM_001163522.1 | 82.48   | 73.57   | 62.46   | 65      |
| Emp1   | NM_010128.4    | 37.41   | 45.88   | 40.19   | 54.88   |
| Enpp6  | NM_177304.3    | 68.57   | 74.82   | 58.13   | 83.56   |
| Entpd2 | NM_009849.2    | 123.34  | 138.63  | 100.42  | 114.04  |
| Eomes  | NM_010136.2    | 14.72   | 15.55   | 11.01   | 20.44   |
| Ep300  | NM_177821.6    | 937.91  | 936.26  | 879.9   | 853.67  |
| Epcam  | NM_008532.2    | 17.03   | 17.55   | 16.1    | 22.21   |
| Epg5   | NM_001195633.1 | 361.05  | 375.88  | 358.87  | 366.51  |
| Epsti1 | NM_029495.2    | 17.01   | 16.61   | 13.69   | 19.16   |
| Erb3   | NM_010153.1    | 109.42  | 134.4   | 92.94   | 106.96  |
| Ercc2  | NM_007949.4    | 309.38  | 322.23  | 296.34  | 277.43  |
| Esam   | NM_027102.3    | 90.46   | 85.49   | 81.87   | 66.52   |
| Ets2   | NM_011809.2    | 934.1   | 872.33  | 907.19  | 845.98  |
| Exo1   | NM_012012.4    | 10.94   | 9.98    | 13.56   | 13.23   |
| Ezh1   | NM_007970.1    | 213.27  | 216.26  | 247.61  | 224.55  |
| Ezh2   | NM_007971.2    | 251.41  | 249.63  | 197.87  | 179.96  |
| F3     | NM_010171.3    | 804.04  | 986.24  | 782.92  | 880.62  |
| Fa2h   | NM_178086.3    | 120.55  | 125.5   | 118.37  | 142.29  |
| Fabp5  | NM_010634.3    | 1925.78 | 2150.34 | 1933.31 | 1950.77 |
| Fadd   | NM_010175.5    | 30.68   | 33.26   | 30.52   | 30.71   |
| Fancc  | NM_007985.2    | 72.7    | 71.57   | 60.58   | 65.48   |
| Fancd2 | NM_001033244.3 | 16.23   | 14.59   | 15.97   | 14.68   |
| Fancg  | NM_053081.2    | 104.32  | 106.69  | 96.6    | 88.22   |
| Fas    | NM_007987.2    | 28.5    | 31.48   | 23.98   | 30.75   |
| Fasl   | NM_010177.3    | 13.61   | 10.8    | 10.66   | 14.69   |
| Fbln5  | NM_011812.4    | 47.66   | 62.14   | 39.67   | 56.29   |
| Fcer1g | NM_010185.4    | 121.53  | 147.74  | 154.34  | 190.85  |
| Fcgr1  | NM_010186.5    | 79.28   | 93.37   | 98.18   | 116.67  |
| Fcgr2b | NM_001077189.1 | 90.38   | 160.8   | 134.43  | 194.27  |
| Fcgr3  | NM_010188.5    | 77.27   | 110.67  | 106.09  | 134.04  |
| Fcrla  | NM_145141.2    | 14.49   | 13.06   | 12      | 14.73   |
| Fcrlb  | NM_001029984.2 | 11.38   | 9.98    | 9.25    | 12.78   |
| Fcrls  | NM_030707.3    | 239.31  | 298.53  | 234.74  | 265.38  |
| Fdxr   | NM_007997.1    | 16.61   | 20.8    | 16.83   | 18.67   |

|         |                |         |         |         |         |
|---------|----------------|---------|---------|---------|---------|
| Fen1    | NM_001271614.1 | 124.66  | 110.14  | 128.49  | 121.22  |
| Fgd2    | NM_001159538.1 | 25.51   | 24.3    | 31.34   | 31.97   |
| Fgf13   | NM_010200.2    | 3407.77 | 3276.57 | 3576.39 | 3336.2  |
| Fgl2    | NM_008013.2    | 40.77   | 66.24   | 47.76   | 59.41   |
| Fkbp5   | NM_010220.3    | 200.09  | 209.27  | 246.45  | 242.62  |
| Flt1    | NM_010228.3    | 101.14  | 88.14   | 61.07   | 56.92   |
| Fos     | NM_010234.2    | 273.49  | 184.22  | 85.25   | 136.83  |
| Foxp3   | NM_054039.2    | 10.91   | 11.12   | 11.14   | 12.37   |
| Fpr1    | NM_013521.2    | 11.54   | 10.12   | 9.7     | 12.11   |
| Fscn1   | NM_007984.2    | 1364.65 | 1336.75 | 1344.7  | 1260.78 |
| Fyn     | NM_008054.2    | 1458    | 1480.32 | 1452.17 | 1404.16 |
| Gadd45a | NM_007836.1    | 115.27  | 103.79  | 105.74  | 110.62  |
| Gadd45g | NM_011817.2    | 152.93  | 152.06  | 115.59  | 147.23  |
| Gal3st1 | NM_001177691.1 | 90.14   | 116.13  | 96.1    | 99.64   |
| Gba     | NM_001077411.1 | 217.57  | 225.64  | 206.96  | 218.38  |
| Gbp2    | NM_010260.1    | 41.68   | 73.78   | 60.05   | 79.07   |
| Gclc    | NM_010295.2    | 335.96  | 354.39  | 370.68  | 356.32  |
| Gdpd2   | NM_023608.3    | 87.94   | 99.56   | 68.38   | 82.85   |
| Gja1    | NM_010288.3    | 4382.05 | 5593.84 | 3906.38 | 4591.54 |
| Gjb1    | NM_008124.2    | 179.18  | 202     | 222.52  | 250.85  |
| Gna15   | NM_010304.3    | 34.69   | 39.62   | 36.04   | 45.26   |
| Gpr183  | NM_183031.2    | 27.24   | 34.52   | 34.87   | 35.23   |
| Gpr34   | NM_011823.4    | 234.96  | 278.89  | 289.19  | 297.7   |
| Gpr62   | NM_001159652.1 | 121.88  | 122.21  | 118.37  | 116.78  |
| Gpr84   | NM_030720.1    | 17.68   | 18.58   | 25.36   | 24.44   |
| Grap    | NM_027817.3    | 50.95   | 50.21   | 48.88   | 51.68   |
| Gria1   | NM_001252403.1 | 5470.21 | 5097.54 | 5674.94 | 5538.88 |
| Gria2   | NM_001039195.1 | 5572.96 | 5218.06 | 5794.14 | 5407.86 |
| Gria4   | NM_001113180.1 | 1087.94 | 1190.96 | 996.22  | 985.94  |
| Grin2a  | NM_008170.2    | 530.66  | 548.23  | 629.33  | 626.11  |
| Grin2b  | NM_008171.3    | 3268.71 | 3070.69 | 3411.32 | 3291.66 |
| Grm2    | NM_001160353.1 | 412.58  | 379.79  | 402.19  | 297.88  |
| Grm3    | NM_181850.2    | 1297.32 | 1300.66 | 1233.34 | 1123.27 |
| Grn     | NM_008175.3    | 502.43  | 550.15  | 549.64  | 637.26  |
| Gsn     | NM_146120.3    | 552.29  | 755.75  | 631.14  | 781.74  |
| Gstm1   | NM_010358.5    | 70.7    | 81.16   | 70.02   | 72.91   |
| Gzma    | NM_010370.2    | 10.02   | 10.12   | 10.96   | 13.32   |
| Gzmb    | NM_013542.2    | 11.5    | 11.07   | 10.26   | 12.79   |
| H2afx   | NM_010436.2    | 751.81  | 717.18  | 745.73  | 656.07  |
| H2-T23  | NM_010398.3    | 51.09   | 55.68   | 57.18   | 74.49   |
| Hat1    | NM_026115.4    | 476.02  | 511.89  | 471.82  | 474.32  |

|          |                |         |         |         |         |
|----------|----------------|---------|---------|---------|---------|
| Hcar2    | NM_030701.1    | 14.65   | 13.18   | 18.49   | 18.72   |
| Hdac1    | NM_008228.2    | 242.56  | 268.63  | 219.34  | 236.58  |
| Hdac2    | NM_008229.2    | 1092.97 | 1070.58 | 1044.17 | 987.43  |
| Hdac4    | NM_207225.1    | 252     | 272.76  | 234.77  | 255.49  |
| Hdac6    | NM_010413.3    | 167.65  | 182.9   | 178.59  | 180     |
| Hdc      | NM_008230.4    | 21.93   | 15.41   | 12.56   | 19.37   |
| Hells    | NM_008234.3    | 42.59   | 49.98   | 42.9    | 42.45   |
| Hif1a    | NM_010431.2    | 1962.44 | 2108.09 | 1938.9  | 1952.45 |
| Hilpda   | NM_023516.5    | 52.84   | 55.31   | 51.27   | 49.23   |
| Hira     | NM_010435.2    | 445.51  | 442.87  | 448.25  | 403.21  |
| Hist1h1d | NM_145713.3    | 11.48   | 12.9    | 11.46   | 13.3    |
| Hmgbl    | NM_010439.3    | 2000.76 | 2146.64 | 2103.92 | 1951.81 |
| Hmox1    | NM_010442.2    | 51.28   | 55.5    | 67.07   | 65.91   |
| Homer1   | NM_147176.2    | 2091.51 | 1967.79 | 1978.05 | 1877.46 |
| Hpgds    | NM_019455.4    | 77.47   | 93.94   | 100.02  | 125.57  |
| Hprt     | NM_013556.2    | 964.95  | 988.48  | 957.61  | 935.74  |
| Hps4     | NM_138646.3    | 97.5    | 104.87  | 101.82  | 103.38  |
| Hrk      | NM_007545.2    | 183.72  | 190.61  | 173.42  | 160.22  |
| Hsd11b1  | NM_008288.2    | 717.26  | 742.3   | 759.01  | 708.12  |
| Hspb1    | NM_013560.2    | 83.12   | 91.25   | 54.57   | 72.05   |
| Hus1     | NM_008316.2    | 204.67  | 230.91  | 199.9   | 200.85  |
| Icam2    | NM_010494.1    | 50.57   | 41.43   | 36.22   | 29.4    |
| Iffi30   | NM_023065.3    | 70.44   | 80.11   | 70.61   | 90.55   |
| Iffih1   | NM_027835.2    | 85.33   | 115.32  | 113.89  | 138.83  |
| Iffitm2  | NM_030694.1    | 260.52  | 355.66  | 257.07  | 325.37  |
| Iffitm3  | NM_025378.2    | 200.71  | 368.52  | 321.28  | 564.38  |
| Iffnar1  | NM_010508.1    | 500.33  | 515.73  | 466.42  | 443.87  |
| Iffnar2  | NM_001110498.1 | 212.55  | 252.81  | 222.8   | 239.96  |
| Igf1     | NM_001111274.1 | 18.85   | 21.14   | 21.29   | 22.18   |
| Igf1r    | NM_010513.2    | 342.81  | 339.94  | 335.12  | 350.51  |
| Igf2r    | NM_010515.1    | 318.52  | 325.56  | 305.53  | 309.62  |
| Igsf10   | NM_001162884.1 | 47.11   | 46.56   | 39.95   | 44.01   |
| Igsf6    | NM_030691.1    | 16.31   | 20.77   | 21.36   | 24.13   |
| Ikbkb    | NM_010546.2    | 330.22  | 323.25  | 305.39  | 291.96  |
| Ikbke    | NM_019777.3    | 19.52   | 24.02   | 20.66   | 24.02   |
| Ikbkg    | NM_178590.2    | 223.83  | 225.1   | 229.84  | 222.04  |
| Il10rb   | NM_008349.5    | 184.1   | 202.51  | 173.22  | 181.77  |
| Il15ra   | NM_008358.2    | 31.97   | 33.22   | 26.45   | 29.55   |
| Il1a     | NM_010554.4    | 12.12   | 15.46   | 18.96   | 21.84   |
| Il1b     | NM_008361.3    | 14.02   | 10.45   | 12.16   | 14.81   |
| Il1r1    | NM_001123382.1 | 188.18  | 196.62  | 181.7   | 174.67  |

|        |                |         |         |        |         |
|--------|----------------|---------|---------|--------|---------|
| Il1r2  | NM_010555.4    | 12.93   | 11.79   | 10.29  | 13.43   |
| Il1rap | NM_134103.2    | 554.32  | 541.12  | 581.32 | 520.05  |
| Il1r12 | NM_133193.3    | 18.78   | 18.48   | 23.36  | 28.54   |
| Il1r1m | NM_031167.5    | 13.77   | 11.3    | 10.47  | 15.45   |
| Il21r  | NM_021887.1    | 16.16   | 20.79   | 21.47  | 20.89   |
| Il2rg  | NM_013563.3    | 27.33   | 23.01   | 25.93  | 33.33   |
| Il3    | NM_010556.4    | 15.33   | 16.15   | 14.25  | 14.66   |
| Il3ra  | NM_008369.1    | 11.08   | 11.14   | 13.67  | 15.96   |
| Il6ra  | NM_010559.2    | 77.72   | 90.82   | 82.88  | 97.94   |
| Inpp5d | NM_001110192.1 | 41.39   | 53.92   | 51.03  | 61.7    |
| Iqsec1 | NM_001134383.1 | 2048.65 | 2059.24 | 2083.2 | 2002.78 |
| Irak1  | NM_008363.2    | 186.85  | 233.88  | 189.69 | 211.31  |
| Irak2  | NM_001113553.1 | 220.32  | 211.33  | 206.41 | 215.67  |
| Irak3  | NM_028679.3    | 31.63   | 26.44   | 32.01  | 31.71   |
| Irak4  | NM_029926.5    | 44.55   | 58.16   | 54.02  | 58.83   |
| Irf1   | NM_008390.1    | 95.86   | 109.42  | 88.68  | 109.92  |
| Irf2   | NM_008391.2    | 428.27  | 428.32  | 419.46 | 419.06  |
| Irf3   | NM_016849.4    | 148.59  | 173.19  | 132.5  | 142.08  |
| Irf4   | NM_013674.1    | 16.57   | 12.6    | 14.45  | 16.76   |
| Irf6   | NM_016851.2    | 18.5    | 18.47   | 15.86  | 16.92   |
| Irf7   | NM_016850.2    | 23.33   | 29.14   | 32.57  | 47.39   |
| Irf8   | NM_008320.3    | 52.22   | 53.23   | 53.3   | 73.97   |
| Islr2  | NM_001161538.1 | 518.51  | 541.65  | 534.41 | 502.27  |
| Itga6  | NM_008397.3    | 298.16  | 332.36  | 257.75 | 281.93  |
| Itga7  | NM_008398.2    | 101.04  | 99.79   | 119.73 | 103.91  |
| Itgam  | NM_001082960.1 | 122.3   | 129.19  | 142.59 | 164.51  |
| Itgav  | NM_008402.2    | 444.79  | 450.04  | 458.56 | 468.16  |
| Itgax  | NM_021334.2    | 10.25   | 13.53   | 14.28  | 16.07   |
| Itgb5  | NM_001145884.1 | 632.88  | 776.15  | 666.16 | 791.56  |
| Jag1   | NM_013822.2    | 82.26   | 85.89   | 62.37  | 63.79   |
| Jam2   | NM_023844.4    | 353.57  | 380.91  | 350.95 | 338.95  |
| Jarid2 | NM_021878.2    | 240.5   | 247.47  | 228.9  | 217.24  |
| Jun    | NM_010591.2    | 931.23  | 1009.79 | 918.85 | 883.8   |
| Kat2a  | NM_020004.5    | 506.4   | 478.3   | 494.55 | 470.32  |
| Kat2b  | NM_020005.3    | 299.08  | 374.67  | 310.56 | 337.4   |
| Kcnd1  | NM_008423.1    | 41.81   | 47.5    | 45.02  | 44.1    |
| Kcnj10 | NM_001039484.1 | 916.59  | 992.25  | 727.79 | 833.62  |
| Kcnk13 | NM_146037.1    | 69.63   | 69.01   | 64.99  | 69.5    |
| Kdm1a  | NM_133872.1    | 893.13  | 943.97  | 895.34 | 856.04  |
| Kdm1b  | NM_172262.3    | 102.92  | 102.41  | 98.01  | 99.38   |
| Kdm2a  | NM_001001984.2 | 605.86  | 557.83  | 536.72 | 521.6   |

|         |                |         |         |         |         |
|---------|----------------|---------|---------|---------|---------|
| Kdm2b   | NM_001003953.1 | 167.93  | 167.17  | 162.28  | 179.48  |
| Kdm3a   | NM_001038695.2 | 389.14  | 382.65  | 334.14  | 331.18  |
| Kdm3b   | NM_001081256.1 | 17.32   | 14.4    | 19.31   | 19.77   |
| Kdm4a   | NM_172382.2    | 246.35  | 245.47  | 240.43  | 248     |
| Kdm4b   | NM_172132.1    | 492.81  | 490.54  | 523.84  | 494.31  |
| Kdm4c   | NM_144787.1    | 356.22  | 353.96  | 361.36  | 334.25  |
| Kdm4d   | NM_173433.2    | 25.85   | 23.01   | 25.54   | 26.85   |
| Kdm5a   | XR_377436.1    | 455.84  | 458.12  | 436.22  | 431.94  |
| Kdm5b   | NM_152895.2    | 748.32  | 757.17  | 710.81  | 714.24  |
| Kdm5c   | NM_013668.3    | 508.62  | 535.09  | 477.46  | 466.65  |
| Kdm5d   | NM_011419.3    | 226.88  | 244.36  | 215.63  | 210.22  |
| Kdm6a   | NM_009483.1    | 173.39  | 161.94  | 167.16  | 170.75  |
| Kif2c   | NM_134471.3    | 15.23   | 10.87   | 12.75   | 14.05   |
| Kir3dl1 | NM_177749.3    | 12.21   | 10.75   | 12.08   | 12.77   |
| Kir3dl2 | NM_177748.2    | 21.54   | 23.13   | 19.31   | 21.13   |
| Kit     | NM_001122733.1 | 259.77  | 330.65  | 315.38  | 314.02  |
| Klrb1   | NM_001099918.1 | 11.56   | 10.75   | 12.05   | 12.66   |
| Klrd1   | NM_010654.2    | 11.08   | 12.21   | 9.94    | 13.99   |
| Klrk1   | NM_001083322.1 | 18.32   | 15.74   | 16.52   | 19.39   |
| Kmt2a   | NM_001081049.1 | 577.05  | 564.39  | 553.07  | 511.91  |
| Kmt2c   | NM_001081383.1 | 520.07  | 535.91  | 492.55  | 456.14  |
| Lacc1   | NM_172488.2    | 79.26   | 90.26   | 93.16   | 95.85   |
| Lag3    | NM_008479.1    | 54.43   | 74.12   | 88.88   | 103.21  |
| Lair1   | NM_001113474.1 | 98.26   | 115.33  | 128.42  | 133.74  |
| Lamp1   | NM_010684.2    | 4161.4  | 4749.62 | 4317.45 | 4600.74 |
| Lamp2   | NM_001017959.1 | 1751.75 | 2229.7  | 1925.79 | 2189.3  |
| Lcn2    | NM_008491.1    | 23.37   | 22.54   | 70.59   | 79.33   |
| Ldha    | NM_010699.2    | 3267.85 | 3229.14 | 3360.13 | 3350.58 |
| Ldlrad3 | NM_178886.2    | 140.79  | 164.24  | 137.52  | 133.14  |
| Lfng    | NM_008494.3    | 294.24  | 346.64  | 271.02  | 336.23  |
| Lgmn    | NM_011175.3    | 1255.94 | 1429.95 | 1355.14 | 1522.34 |
| Lig1    | NM_001083188.1 | 86.05   | 80.4    | 77.71   | 70.73   |
| Lilrb4a | NM_013532.3    | 24.68   | 35.84   | 37      | 62.54   |
| Lingo1  | NM_181074.4    | 1377.21 | 1465.87 | 1689.85 | 1607.14 |
| Lmna    | NM_001002011.2 | 363.49  | 366.43  | 385.23  | 380.61  |
| Lmnb1   | NM_010721.2    | 121.71  | 115.27  | 101.72  | 89.26   |
| Lrg1    | NM_029796.2    | 18.47   | 17.65   | 15.66   | 17.65   |
| Lrrc25  | NM_153074.3    | 13.75   | 16.7    | 18.47   | 19.63   |
| Lrrc3   | NM_145152.4    | 95.96   | 91.55   | 97.52   | 95.61   |
| Lsr     | NM_001164184.1 | 94.36   | 95.01   | 67.27   | 64.13   |
| Lst1    | NM_010734.2    | 20.68   | 19.7    | 17.14   | 21.76   |



|          |                |         |         |         |         |
|----------|----------------|---------|---------|---------|---------|
| Lta      | NM_010735.2    | 15      | 15.39   | 14.86   | 14.21   |
| Ltb      | NM_008518.2    | 18.44   | 12.41   | 17.37   | 17.74   |
| Ltbr     | NM_010736.3    | 58.51   | 76.21   | 57.86   | 71.28   |
| Ltc4s    | NM_008521.1    | 21.05   | 20.84   | 22.12   | 22.25   |
| Ly6a     | NM_010738.2    | 223.84  | 226.58  | 248.83  | 217.88  |
| Ly6g     | XM_909927.2    | 15.21   | 11.67   | 11.8    | 14.24   |
| Ly9      | NM_008534.2    | 14.32   | 26.03   | 26.64   | 40.51   |
| Lyn      | NM_010747.1    | 74.71   | 86.1    | 92.04   | 115.65  |
| Mafb     | NM_010658.2    | 295.8   | 346.53  | 357.63  | 367.53  |
| Maff     | NM_010755.3    | 17.69   | 21.32   | 19.44   | 23.63   |
| Mag      | NM_010758.2    | 320.65  | 359.89  | 329.97  | 397.59  |
| Mal      | NM_001171187.1 | 1914.51 | 2093.86 | 1737.8  | 1760.25 |
| Man2b1   | NM_010764.2    | 387.08  | 463.19  | 456.09  | 516.18  |
| Map1lc3a | NM_025735.1    | 1388.21 | 1340.94 | 1365.55 | 1386.3  |
| Map2k1   | NM_008927.3    | 4395.88 | 4272.32 | 4786.14 | 4388.72 |
| Map2k4   | NM_009157.4    | 2105.43 | 2140.37 | 2148.73 | 2088.26 |
| Map3k1   | NM_011945.2    | 123.88  | 122.05  | 99.79   | 111.14  |
| Map3k14  | NM_016896.3    | 23.21   | 23.22   | 22.8    | 23.49   |
| Mapk10   | NM_001081567.1 | 3744.73 | 3989.33 | 4076.29 | 3844.69 |
| Mapk12   | NM_013871.3    | 18.27   | 18.71   | 18.34   | 16.66   |
| Mapk14   | NM_011951.2    | 607.36  | 625.2   | 605.39  | 582.21  |
| Mapt     | NM_001038609.2 | 1534.29 | 1531.39 | 1508.01 | 1496.6  |
| Marco    | NM_010766.2    | 17.76   | 13.79   | 17.09   | 16.19   |
| Mavs     | NM_144888.2    | 121.27  | 132.76  | 112.02  | 120.24  |
| Mb21d1   | NM_173386.4    | 23.73   | 27.15   | 22.31   | 26.04   |
| Mbd2     | NM_010773.2    | 1467.61 | 1473.98 | 1476.17 | 1433.82 |
| Mbd3     | NM_013595.2    | 1070.08 | 1015.55 | 1024.12 | 977.39  |
| Mcm2     | NM_008564.2    | 41.25   | 40.02   | 35.18   | 35.79   |
| Mcm5     | NM_008566.2    | 60.24   | 59.26   | 62.08   | 57.46   |
| Mcm6     | NM_008567.1    | 135.84  | 115.08  | 120.83  | 108.8   |
| Mdc1     | NM_001010833.2 | 124.89  | 126.73  | 119.09  | 118.62  |
| Mdm2     | NM_010786.4    | 729.91  | 734.73  | 671.1   | 665.91  |
| Mef2c    | NM_001170537.1 | 1895.83 | 1723.13 | 2084.69 | 1774.92 |
| Mertk    | NM_008587.1    | 347.74  | 423.26  | 411     | 429.77  |
| Mfge8    | NM_008594.2    | 286.94  | 295.5   | 256.22  | 282.99  |
| Mgmt     | NM_008598.2    | 31.45   | 39.25   | 30.24   | 38.48   |
| Mmp12    | NM_008605.3    | 11.87   | 15.19   | 17.52   | 27.75   |
| Mmp14    | NM_008608.3    | 96.6    | 111.7   | 70.52   | 86.28   |
| Mobp     | NM_001039364.2 | 4026.8  | 4489.38 | 4410.36 | 4623.73 |
| Mog      | NM_010814.2    | 642.9   | 796.82  | 687.1   | 778.47  |
| Mpeg1    | NM_010821.1    | 270.99  | 359.28  | 393.35  | 539.81  |

|         |                |         |         |         |         |
|---------|----------------|---------|---------|---------|---------|
| Mpg     | NM_010822.3    | 44.22   | 42.35   | 51.23   | 51.4    |
| Mr1     | NM_008209.4    | 108.18  | 143.08  | 119.96  | 147.97  |
| Mre11a  | NM_018736.2    | 196.46  | 194.12  | 192.4   | 178.03  |
| Ms4a1   | NM_007641.5    | 9.92    | 10.3    | 9.25    | 11.98   |
| Ms4a2   | NM_001276330.1 | 9.92    | 9.98    | 9.25    | 11.98   |
| Ms4a4a  | XM_003086124.1 | 17.6    | 26.6    | 19.24   | 23.69   |
| Msh2    | NM_008628.2    | 398.24  | 421.47  | 404.55  | 367.76  |
| Msn     | NM_010833.2    | 101.31  | 109     | 102.65  | 123.75  |
| Msr1    | NM_001113326.1 | 15.96   | 15.31   | 15.78   | 18      |
| Mvp     | NM_080638.2    | 63.09   | 94.43   | 78.58   | 107.63  |
| Myc     | NM_010849.4    | 73.69   | 84.24   | 70.46   | 74.35   |
| Myct1   | NM_026793.2    | 27.68   | 25.53   | 23.92   | 22.61   |
| Myd88   | NM_010851.2    | 58.49   | 56.29   | 55.35   | 55.77   |
| Myrf    | NM_001033481.1 | 577.52  | 687.21  | 617.09  | 718.22  |
| Nbn     | NM_013752.3    | 127.95  | 160.84  | 132.83  | 134.29  |
| Ncaph   | NM_144818.3    | 22.84   | 18.21   | 20.69   | 17.94   |
| Ncf1    | NM_001286037.1 | 51.3    | 63.01   | 66.68   | 76.46   |
| Ncor1   | NM_011308.2    | 1219.66 | 1179.09 | 1214.72 | 1138.18 |
| Ncor2   | NM_011424.2    | 695.6   | 659.24  | 635.87  | 603.35  |
| Ncr1    | NM_010746.3    | 9.92    | 9.98    | 9.25    | 11.98   |
| Nefl    | NM_010910.1    | 1360.35 | 1326.12 | 1399.62 | 1380.79 |
| Nfe2l2  | NR_132727.1    | 58.13   | 74.74   | 57.53   | 66.75   |
| Nfkb1   | NM_008689.2    | 241.46  | 254.27  | 222.04  | 223.48  |
| Nfkb2   | NM_019408.2    | 19.76   | 27.79   | 26.37   | 26.23   |
| Nfkbia  | NM_010907.2    | 71.7    | 103.23  | 76.14   | 94.8    |
| Nfkbie  | NM_008690.3    | 32.07   | 31.54   | 30.34   | 32.49   |
| Ngf     | NM_001112698.1 | 99.74   | 101.43  | 99.8    | 106.68  |
| Ngfr    | NM_033217.3    | 20.92   | 22.28   | 15.88   | 19.59   |
| Ninj2   | NM_016718.2    | 34.08   | 29.07   | 32.23   | 31.86   |
| Nkg7    | NM_024253.4    | 15.67   | 11.89   | 15.21   | 17.79   |
| Nlgn1   | NM_138666.3    | 1466.36 | 1520.26 | 1466.71 | 1488.72 |
| Nlgn2   | NM_198862.2    | 2478.15 | 2409.12 | 2494.09 | 2344.94 |
| Nlrp3   | NM_145827.3    | 15.28   | 19.01   | 15.65   | 21.25   |
| Nod1    | NM_172729.2    | 52.53   | 54.38   | 47.38   | 50.18   |
| Nostrin | NM_181547.3    | 44.58   | 39.96   | 41.58   | 36.99   |
| Npl     | NM_028749.1    | 67.25   | 82.33   | 64.08   | 78.26   |
| Npnt    | NM_001029836.1 | 278.51  | 277.32  | 256.56  | 211.44  |
| Nptx1   | NM_008730.2    | 5924.76 | 5728.21 | 6903.89 | 6089.09 |
| Nqo1    | NM_008706.5    | 103.87  | 137.8   | 106.12  | 137.73  |
| Nrgn    | NM_022029.2    | 6196.66 | 5857.58 | 6937.61 | 6053.84 |
| Nrm     | NM_134122.2    | 25.69   | 26.37   | 23.67   | 27.13   |

|         |                |          |          |          |          |
|---------|----------------|----------|----------|----------|----------|
| Nrp2    | NM_001077403.1 | 282.72   | 306.56   | 256.56   | 297.09   |
| Nth1    | NM_008743.2    | 48.86    | 54.89    | 46.8     | 51.34    |
| Nwd1    | NM_176940.5    | 465.64   | 511.59   | 465.84   | 464.94   |
| Oas1g   | NM_011852.2    | 16.62    | 18.22    | 20.27    | 24.2     |
| Ogg1    | NM_010957.4    | 51.15    | 55.01    | 57.69    | 59.07    |
| Olfml3  | NM_133859.2    | 212.2    | 260.56   | 234.95   | 243.88   |
| Opalin  | NM_153520.1    | 676.26   | 728.94   | 714.93   | 724.6    |
| Optn    | NM_181848.4    | 222.66   | 247.27   | 227.98   | 256.36   |
| Osgin1  | NM_027950.1    | 16.33    | 14.06    | 18.18    | 21.13    |
| Osmr    | NM_011019.3    | 57.48    | 85.65    | 87.62    | 119.84   |
| P2rx7   | NM_001038839.2 | 161.3    | 189.03   | 180.72   | 201.01   |
| P2ry12  | NM_027571.3    | 497.89   | 508.2    | 537.33   | 514.96   |
| Pacsin1 | NM_011861.3    | 2421.95  | 2284.92  | 2466.61  | 2278.27  |
| Padi2   | NM_008812.2    | 242      | 348.43   | 252.94   | 313.98   |
| Pak1    | NM_011035.2    | 4282.77  | 4648.35  | 4331.65  | 3985.16  |
| Parp1   | NM_007415.2    | 672.49   | 667.49   | 687.66   | 687.86   |
| Parp2   | NM_009632.2    | 265.01   | 288.07   | 269.25   | 253.3    |
| Pcna    | NM_011045.2    | 747.06   | 799.52   | 764.74   | 751.03   |
| Pdpn    | NM_010329.2    | 306.46   | 414.52   | 308.73   | 410.44   |
| Pecam1  | NM_008816.2    | 194.55   | 172.93   | 153.08   | 118.09   |
| Pex14   | NM_019781.2    | 406.89   | 405.04   | 437.21   | 406.9    |
| Pik3ca  | NM_008839.1    | 679.72   | 763.79   | 657.23   | 633.09   |
| Pik3cb  | NM_029094.3    | 649.4    | 669.53   | 631.7    | 564.46   |
| Pik3cd  | XM_003945690.1 | 122.05   | 128.47   | 125.93   | 109.41   |
| Pik3cg  | NM_020272.2    | 30.89    | 41.05    | 42.07    | 45.54    |
| Pik3r1  | NM_001024955.1 | 740.61   | 870.3    | 764.68   | 818.74   |
| Pik3r2  | NM_008841.2    | 1112.56  | 1107.59  | 1170.01  | 1088.59  |
| Pik3r5  | NM_177320.2    | 17.82    | 16.43    | 13.01    | 20.48    |
| Pilra   | NM_153510.3    | 12.2     | 12.93    | 15.05    | 13.72    |
| Pilrb1  | NM_133209.2    | 11.04    | 9.98     | 9.81     | 12.44    |
| Pink1   | NM_026880.2    | 3634.29  | 3867.96  | 3918.17  | 3637.18  |
| Pla2g4a | NM_008869.2    | 37.34    | 43.08    | 42.09    | 47.48    |
| Pla2g5  | NM_001122954.1 | 35.09    | 43.86    | 28.36    | 52.42    |
| Plcg2   | NM_172285.1    | 88.45    | 93.26    | 104.83   | 108.83   |
| Pld1    | NM_001164056.1 | 62.78    | 74.68    | 66.16    | 68.9     |
| Pld2    | NM_008876.2    | 65.82    | 72.88    | 57.56    | 67.89    |
| Plekhb1 | NM_001163184.1 | 4428.82  | 5205.42  | 4363.31  | 4831.17  |
| Plekha1 | NM_183034.1    | 199.69   | 207.98   | 195.97   | 179.5    |
| Plip    | NM_026385.3    | 148.18   | 168.66   | 160.28   | 168.56   |
| Plp1    | NM_011123.2    | 12449.08 | 15338.39 | 12677.84 | 14762.99 |
| Plxdc2  | NM_026162.5    | 696.49   | 740.6    | 645.76   | 710.98   |

|         |                |          |         |          |          |
|---------|----------------|----------|---------|----------|----------|
| Plxnb3  | NM_019587.2    | 125.92   | 168.45  | 136.53   | 165.55   |
| Pmp22   | NM_008885.2    | 174.66   | 216.78  | 202.65   | 242.05   |
| Pms2    | NM_008886.2    | 331.19   | 338.42  | 346.93   | 331.63   |
| Pnoc    | NM_001205075.1 | 47.75    | 41.99   | 37.99    | 45.51    |
| Pole    | NM_011132.2    | 23.96    | 23.21   | 25.19    | 24.73    |
| Ppfia4  | NM_001144855.1 | 318.42   | 275.18  | 319.06   | 277.55   |
| Ppp3ca  | NM_008913.4    | 18273.11 | 15385.3 | 19444.64 | 16578.58 |
| Ppp3cb  | NM_008914.2    | 4175.49  | 4146.22 | 4514.75  | 4187.42  |
| Ppp3r1  | NM_024459.2    | 6432.52  | 5682.03 | 6943.94  | 6215.81  |
| Ppp3r2  | NM_001004025.4 | 27.32    | 29.02   | 25.95    | 21.08    |
| Prdx1   | NM_011034.4    | 228.48   | 239.28  | 217.55   | 242.38   |
| Prf1    | NM_011073.2    | 9.92     | 10.12   | 9.38     | 12.57    |
| Prkaca  | NM_008854.3    | 3676.5   | 3591.17 | 3668.59  | 3502.61  |
| Prkacb  | NM_011100.3    | 3000.86  | 2763.18 | 2820.88  | 2658.42  |
| Prkar1a | NM_021880.2    | 6877.89  | 6816.97 | 6821.16  | 6654.55  |
| Prkar2a | NM_008924.2    | 762.86   | 756.49  | 733.24   | 701.66   |
| Prkar2b | NM_011158.3    | 614.82   | 523.62  | 508.24   | 458.62   |
| Prkce   | NM_011104.2    | 5249.66  | 5032.4  | 5769.75  | 5312.1   |
| Prkcq   | NM_008859.2    | 106.51   | 111.9   | 82.71    | 95.53    |
| Prkdc   | NM_011159.2    | 219.29   | 237.33  | 246.6    | 234.29   |
| Pros1   | NM_011173.2    | 110.2    | 140.75  | 131.69   | 151.1    |
| Psen2   | NM_001128605.1 | 141.73   | 144.37  | 138.96   | 136.97   |
| Psemb8  | NM_010724.2    | 94.57    | 115.51  | 121.26   | 158.25   |
| Pten    | NM_008960.2    | 2376.66  | 2398.69 | 2513.49  | 2354.12  |
| Ptger3  | NM_011196.2    | 19.15    | 18.16   | 19.24    | 18.45    |
| Ptger4  | NM_008965.1    | 18.21    | 13.54   | 13.59    | 15.27    |
| Ptgs2   | NM_011198.3    | 225      | 232.54  | 314.76   | 281.4    |
| Ptms    | NM_026988.2    | 6160.18  | 5960.72 | 6433.71  | 6132.83  |
| Ptpn6   | NM_013545.2    | 56.17    | 59.03   | 58.09    | 77.92    |
| Ptprc   | NM_011210.3    | 50.55    | 53.42   | 57.22    | 82.29    |
| Pttg1   | NM_001131054.1 | 663.64   | 764.78  | 715.45   | 693.78   |
| Ptx3    | NM_008987.3    | 23.61    | 20.43   | 19.78    | 27.39    |
| Pycard  | NM_023258.4    | 10.85    | 11.88   | 10.61    | 14.16    |
| Rab6b   | NM_173781.4    | 4113.76  | 4016.74 | 4139.78  | 3799.49  |
| Rab7    | NM_009005.2    | 4000.11  | 3959.54 | 4221.03  | 4099.56  |
| Rac1    | NM_009007.2    | 3535.67  | 3761.38 | 3726.41  | 3720.36  |
| Rac2    | NM_009008.3    | 23.08    | 24.79   | 24.54    | 26.94    |
| Rad1    | NM_011232.2    | 158.9    | 189.01  | 166.57   | 154.91   |
| Rad17   | NM_001044371.1 | 152.4    | 152.6   | 137.21   | 147.71   |
| Rad50   | NM_009012.2    | 139.95   | 145.73  | 152.1    | 151.41   |
| Rad51   | NM_011234.4    | 23.39    | 28.65   | 22.35    | 24.69    |

|           |                |          |          |         |          |
|-----------|----------------|----------|----------|---------|----------|
| Rad51b    | NM_009014.3    | 15.02    | 13.2     | 13.27   | 15.72    |
| Rad51c    | NM_053269.3    | 44.84    | 48.41    | 49.37   | 45.49    |
| Rad9a     | NM_011237.2    | 53.05    | 53.11    | 45.89   | 42.29    |
| Rag1      | NM_009019.2    | 11.75    | 12.04    | 11.92   | 12.55    |
| Rala      | NM_019491.5    | 696.48   | 758.33   | 681.42  | 660.17   |
| Ralb      | NM_022327.5    | 284.46   | 322.97   | 288.69  | 281.65   |
| Rapgef3   | NM_001177810.1 | 238.02   | 291.51   | 221.35  | 264.5    |
| Rb1cc1    | NM_009826.4    | 1113.25  | 1168.27  | 1119.74 | 1041.16  |
| Rbfox3    | NM_001024931.2 | 2501.55  | 2194.62  | 2697.37 | 2263.55  |
| Rela      | NM_009045.4    | 146.59   | 145.97   | 132.65  | 134.53   |
| Relb      | NM_009046.2    | 142.18   | 157.1    | 149.95  | 174.97   |
| Reln      | NM_011261.2    | 291.3    | 275      | 237.29  | 233.46   |
| Rgl1      | NM_016846.3    | 360.15   | 374.01   | 381.81  | 383.7    |
| Rhoa      | NM_016802.4    | 1809.43  | 1832.44  | 1791.61 | 1874.93  |
| Ripk1     | NM_009068.3    | 34.46    | 42.18    | 33.76   | 41.83    |
| Ripk2     | NM_138952.3    | 107.87   | 101.7    | 105.25  | 89.36    |
| Rnf8      | NM_021419.2    | 322.85   | 334.94   | 312.48  | 296.57   |
| Rpa1      | NM_026653.2    | 688.52   | 756.37   | 718.52  | 756.33   |
| Rpl28     | NM_009081.2    | 4273.11  | 4647.92  | 4195.58 | 4174.36  |
| Rpl29     | NM_009082.2    | 2313.87  | 2423.42  | 2411.04 | 2392.7   |
| Rpl36al   | NM_025589.4    | 1063.34  | 1126.19  | 1006.64 | 1008.61  |
| Rpl9      | NM_011292.2    | 4218.41  | 4246.96  | 3940.07 | 3934.36  |
| Rps10     | NM_025963.3    | 901.91   | 970.96   | 958.87  | 1032.08  |
| Rps2      | NM_008503.5    | 3938.33  | 3855.87  | 3899.85 | 3867.71  |
| Rps21     | NM_025587.2    | 11812.07 | 12045.04 | 11961.6 | 11894.85 |
| Rps3      | NM_012052.2    | 224.51   | 239.24   | 220.57  | 199.47   |
| Rps9      | NM_029767.2    | 4035.87  | 4260.72  | 3850    | 4132.79  |
| Rrm2      | NM_009104.1    | 19.73    | 18.52    | 15.59   | 14.97    |
| Rsad2     | NM_021384.2    | 54.62    | 45.73    | 56.6    | 68.66    |
| Rtn4rl1   | NM_177708.4    | 559.97   | 642.58   | 657.28  | 638.43   |
| S100a10   | NM_009112.2    | 640.61   | 890.82   | 698.75  | 839.71   |
| S100b     | NM_009115.3    | 1068.09  | 1400.04  | 1296.86 | 1457.12  |
| S1pr3     | NM_010101.3    | 105.24   | 146.98   | 112.96  | 176.86   |
| S1pr4     | NM_010102.2    | 16.26    | 12.02    | 10.43   | 13.83    |
| S1pr5     | NM_053190.2    | 87.41    | 88.33    | 92.2    | 96.02    |
| Sall1     | NM_021390.3    | 326.55   | 373.15   | 347.45  | 377.73   |
| Sell      | XM_006496716.1 | 18.18    | 12.32    | 11.75   | 12.59    |
| Serpina3n | NM_009252.2    | 168.51   | 218.1    | 239.05  | 380.52   |
| Serpine1  | NM_008871.2    | 15       | 16.42    | 18.47   | 24.1     |
| Serpinf1  | NM_011340.3    | 239.81   | 288.38   | 236.25  | 232.6    |
| Serping1  | NM_009776.3    | 64.87    | 112.74   | 77.45   | 100.36   |

|         |                |         |         |         |         |
|---------|----------------|---------|---------|---------|---------|
| Sesn1   | NM_001013370.2 | 575.28  | 586.03  | 585.72  | 516.6   |
| Sesn2   | NM_144907.1    | 89.8    | 93.08   | 79.9    | 88.38   |
| Setd1a  | NM_178029.3    | 157.62  | 152.76  | 155.88  | 152.35  |
| Setd1b  | NM_001040398.1 | 509.99  | 543.1   | 485.45  | 472.9   |
| Setd2   | NM_001081340.2 | 1159.46 | 1163.67 | 1096.79 | 1033.81 |
| Setd7   | NM_080793.5    | 530.56  | 517.77  | 488.01  | 444.61  |
| Setdb1  | NM_018877.2    | 143.01  | 135.27  | 124.72  | 132.31  |
| Sftpd   | NM_009160.2    | 15.25   | 15.72   | 11.86   | 13.57   |
| Sh2d1a  | NR_132588.1    | 10.68   | 10.27   | 9.25    | 12.51   |
| Shank3  | NM_021423.3    | 975.2   | 902.98  | 952.87  | 875     |
| Siglec1 | NM_011426.3    | 12.65   | 11.41   | 13.11   | 14.97   |
| Siglecf | NM_145581.1    | 16.22   | 14.98   | 21.1    | 22.89   |
| Sin3a   | NM_001110350.1 | 473.13  | 476.22  | 441.85  | 421.15  |
| Sirt1   | NM_019812.2    | 245.01  | 251.18  | 237.11  | 220.74  |
| Slamf8  | NM_029084.3    | 11.36   | 14.95   | 14.79   | 17.23   |
| Slamf9  | NM_029612.4    | 26.98   | 37.04   | 45.67   | 58.24   |
| Slc10a6 | NM_029415.2    | 13.61   | 14.93   | 13.36   | 17.79   |
| Slc17a6 | NM_080853.3    | 508.43  | 561.68  | 253.49  | 236.13  |
| Slc17a7 | NM_182993.2    | 5631.11 | 6060.48 | 7397.46 | 6734.04 |
| Slc1a3  | NM_148938.3    | 5728.18 | 6532.98 | 6136.7  | 6433.87 |
| Slc2a1  | NM_011400.3    | 205.03  | 236.52  | 212.45  | 220.57  |
| Slc2a5  | NM_019741.3    | 76.48   | 71.74   | 76.63   | 73.2    |
| Slc44a1 | NM_001159633.1 | 1164.71 | 1352.93 | 1267.47 | 1369.33 |
| Slc6a1  | NM_178703.4    | 2474.4  | 2614.64 | 2429.83 | 2414.58 |
| Slco2b1 | NM_175316.3    | 119.75  | 136.03  | 121.98  | 136.08  |
| Slnf8   | NM_181545.4    | 27.27   | 33.4    | 35.9    | 50.58   |
| Smarca4 | NM_011417.2    | 1027.42 | 1068.03 | 965.54  | 950.27  |
| Smarca5 | NM_053124.2    | 1687.97 | 1745    | 1620    | 1635.29 |
| Smarcd1 | NM_031842.1    | 366.35  | 361.78  | 391.52  | 363.49  |
| Smc1a   | NM_019710.2    | 598.41  | 633.82  | 571.83  | 548.67  |
| Snca    | NM_009221.2    | 2647.78 | 2831.95 | 2877    | 2747.03 |
| Socs3   | NM_007707.2    | 26.94   | 29.02   | 26.1    | 34.36   |
| Sod2    | NM_013671.3    | 2790.88 | 2827.06 | 2739.6  | 2599.32 |
| Sox10   | XM_128139.6    | 212.13  | 243.99  | 217.18  | 229.24  |
| Sox4    | NM_009238.2    | 168.32  | 168.75  | 136.21  | 141.48  |
| Sox9    | NM_011448.4    | 601.33  | 719.76  | 558.74  | 671.04  |
| Sphk1   | NM_011451.3    | 19.7    | 21.8    | 15.5    | 15.71   |
| Spib    | NM_019866.1    | 13.2    | 10.75   | 12.86   | 13.07   |
| Spint1  | NM_016907.3    | 17.98   | 20.51   | 22.32   | 23.39   |
| Spp1    | NM_009263.3    | 213.14  | 424.9   | 217.39  | 296.35  |
| Sqstm1  | NM_011018.2    | 2255.11 | 2199.3  | 2370.89 | 2346.89 |

|          |                |         |         |         |         |
|----------|----------------|---------|---------|---------|---------|
| Srgn     | NM_011157.2    | 137.28  | 158.28  | 144.18  | 143.14  |
| Srxn1    | NM_029688.4    | 665.67  | 628.7   | 655.2   | 618.49  |
| St3gal6  | NM_018784.2    | 211.1   | 227.21  | 194.13  | 199.12  |
| St8sia6  | NM_145838.1    | 83.86   | 69.38   | 83.49   | 89.31   |
| Stat1    | NM_009283.3    | 190.59  | 218.19  | 217.85  | 244.42  |
| Steap4   | NM_054098.3    | 15.11   | 15.57   | 13.84   | 21.91   |
| Stmn1    | NM_019641.3    | 5876.9  | 6672.46 | 5546.85 | 5184.21 |
| Stx18    | NM_026959.2    | 100.69  | 120.45  | 106.13  | 110.27  |
| Sumo1    | NM_009460.1    | 3438.04 | 3450.2  | 3343.97 | 3242.54 |
| Suv39h1  | NM_011514.2    | 354     | 354.75  | 356.3   | 348.47  |
| Suv39h2  | NM_022724.4    | 87.57   | 84.21   | 78.49   | 77.07   |
| Suz12    | NM_199196.1    | 857.41  | 871.1   | 839.96  | 826.02  |
| Syk      | NM_001198977.1 | 45.22   | 47.78   | 47.62   | 46.91   |
| Syn2     | NM_013681.1    | 5243.03 | 5260.56 | 5769.78 | 5566.28 |
| Syp      | NM_009305.2    | 7607.04 | 7558.78 | 7895.15 | 7676.73 |
| Tarbp2   | NM_001253795.1 | 141.37  | 147.65  | 138.65  | 122.01  |
| Tbc1d4   | NM_001081278.2 | 54.67   | 51.57   | 45.79   | 46.96   |
| Tbr1     | NM_009322.3    | 196.73  | 202.85  | 235.83  | 176.85  |
| Tbx21    | NM_019507.2    | 10.92   | 9.98    | 9.85    | 12.71   |
| Tcirg1   | NM_001136091.1 | 80.44   | 94.07   | 71.61   | 95.83   |
| Tcl1     | NM_009337.3    | 10.26   | 10      | 9.25    | 11.98   |
| Tet1     | NM_027384.1    | 241.94  | 220.4   | 199.06  | 183.49  |
| Tfg      | NM_001252443.1 | 1340.35 | 1355.93 | 1315.53 | 1324.32 |
| Tgfa     | NM_031199.2    | 257.15  | 238.55  | 240.6   | 242.97  |
| Tgfb1    | NM_011577.1    | 78.43   | 74.84   | 75.93   | 90.52   |
| Tgfb1    | NM_009370.2    | 495.48  | 537.74  | 519.55  | 516.89  |
| Tgm1     | NM_001161714.1 | 9.92    | 12.2    | 12.56   | 17.78   |
| Tgm2     | NM_009373.3    | 59.74   | 58.18   | 60.72   | 58.75   |
| Tie1     | NM_011587.2    | 74.12   | 55.57   | 44.43   | 34.99   |
| Timeless | NM_011589.1    | 38.67   | 43.55   | 33.46   | 36.74   |
| Timp1    | NM_011593.2    | 9.92    | 11.12   | 10.27   | 13.7    |
| Tle3     | NM_009389.2    | 319.25  | 411.47  | 339.15  | 389.43  |
| Tlr2     | NM_011905.2    | 14.83   | 15.73   | 14.74   | 26.23   |
| Tlr4     | NM_021297.2    | 33.91   | 55.12   | 36.53   | 53.88   |
| Tlr7     | NM_133211.3    | 22.83   | 28.98   | 29.56   | 35.93   |
| Tm4sf1   | NM_008536.3    | 220.99  | 310.51  | 226.65  | 243.34  |
| Tmc7     | NM_172476.4    | 119.52  | 118.65  | 100.84  | 104.34  |
| Tmcc3    | NM_172051.2    | 611.14  | 657.89  | 623.19  | 660.78  |
| Tmem100  | NM_026433.2    | 217.82  | 263.61  | 209.98  | 229.92  |
| Tmem119  | NM_146162.2    | 325.96  | 366.17  | 410.08  | 398.66  |
| Tmem144  | NM_027495.4    | 167.98  | 167.91  | 168.64  | 158.64  |

|           |                |         |         |         |         |
|-----------|----------------|---------|---------|---------|---------|
| Tmem173   | NM_028261.1    | 23.02   | 24.29   | 28.72   | 32.82   |
| Tmem204   | NM_001001183.1 | 32.03   | 43.55   | 34.03   | 28.72   |
| Tmem206   | NM_025864.3    | 212.19  | 203.12  | 179.66  | 192.19  |
| Tmem37    | NM_019432.2    | 22.76   | 31.08   | 27.29   | 31.18   |
| Tmem64    | NM_181401.3    | 996.99  | 1035.96 | 895.14  | 855.72  |
| Tmem88b   | NM_001033394.3 | 311.82  | 359.07  | 342.58  | 386.69  |
| Tnf       | NM_013693.2    | 12.12   | 11.89   | 11.23   | 12.33   |
| Tnfrsf10b | NM_020275.3    | 20.78   | 18.58   | 16.92   | 18.26   |
| Tnfrsf11b | NM_008764.3    | 15.58   | 19.49   | 17.74   | 20.43   |
| Tnfrsf12a | NM_001161746.1 | 71.97   | 73.55   | 61.87   | 71.03   |
| Tnfrsf13c | NM_028075.2    | 14.71   | 13.16   | 15.49   | 16.5    |
| Tnfrsf17  | NM_011608.1    | 17.52   | 18.71   | 22.25   | 17.81   |
| Tnfrsf1a  | NM_011609.2    | 129.21  | 170.09  | 131.15  | 166.1   |
| Tnfrsf1b  | NM_011610.3    | 32.1    | 29.64   | 28.26   | 30.49   |
| Tnfrsf25  | NM_033042.3    | 71.94   | 65.82   | 54.08   | 49.71   |
| Tnfrsf4   | NM_011659.2    | 10.18   | 11.64   | 10.87   | 12.41   |
| Tnfsf10   | NM_009425.2    | 27.27   | 29.33   | 29.09   | 28.6    |
| Tnfsf12   | NM_011614.3    | 95.57   | 99.97   | 94.17   | 92.2    |
| Tnfsf13b  | NM_033622.1    | 19.51   | 16.14   | 21.07   | 21.91   |
| Tnfsf4    | NM_009452.2    | 9.92    | 10.13   | 9.25    | 12.26   |
| Tnfsf8    | NM_009403.2    | 11.31   | 10.3    | 10.51   | 13.46   |
| Top2a     | NM_011623.2    | 34.12   | 25.32   | 21.47   | 25      |
| Topbp1    | NM_176979.5    | 90.34   | 103.02  | 100.92  | 99.8    |
| Tpd52     | NM_001025262.1 | 1218.75 | 1179.86 | 1213.76 | 1151.52 |
| Tpsb2     | NM_010781.3    | 9.92    | 10.96   | 9.25    | 12.93   |
| Tradd     | NM_001033161.2 | 37.53   | 37.58   | 35.29   | 34      |
| Traf1     | NM_009421.3    | 21.99   | 28.82   | 22.53   | 32.56   |
| Traf2     | NM_009422.2    | 179.97  | 184.7   | 150.66  | 159.63  |
| Traf3     | NM_011632.3    | 400.34  | 428.53  | 379.13  | 396.09  |
| Traf6     | NM_009424.2    | 223.91  | 241.17  | 210.53  | 217.24  |
| Trat1     | NM_198297.3    | 11.88   | 13.34   | 12.37   | 13.6    |
| Trem1     | NM_021406.5    | 10.73   | 9.98    | 9.7     | 12.39   |
| Trem2     | NM_031254.2    | 190.69  | 268.77  | 283.08  | 367.69  |
| Trem3     | NM_021407.3    | 13.89   | 12.72   | 11.42   | 12.26   |
| Trim47    | NM_001205081.1 | 67.39   | 71.62   | 61.73   | 64.15   |
| Trp53     | NM_011640.1    | 114.29  | 116.75  | 107.44  | 115.34  |
| Trp53bp2  | NM_173378.2    | 229.94  | 262.63  | 243.23  | 240.63  |
| Trp73     | NM_011642.3    | 51.87   | 59.13   | 42.29   | 51.21   |
| Trpa1     | NM_177781.4    | 13.7    | 13.07   | 11.47   | 15.12   |
| Trpm4     | NM_175130.4    | 31.36   | 32.29   | 35.04   | 34.69   |
| Tspan18   | NM_183180.2    | 126.09  | 169.33  | 154.96  | 156.89  |



|        |                |         |         |         |         |
|--------|----------------|---------|---------|---------|---------|
| Ttr    | NM_013697.4    | 647.54  | 708.58  | 309.8   | 2289.91 |
| Tubb3  | NM_023279.2    | 3034.09 | 2922.86 | 2820.36 | 2672    |
| Tubb4a | NM_009451.3    | 1284.55 | 1376.01 | 1291.85 | 1228.83 |
| Txnrd1 | NM_015762.2    | 875.7   | 839.22  | 806.73  | 777.02  |
| Tyrobp | NM_011662.2    | 380.98  | 494.03  | 505.17  | 672.92  |
| Ugt8a  | NM_011674.4    | 504.03  | 563.34  | 468.53  | 525.24  |
| Ulk1   | NM_009469.3    | 833.56  | 852.07  | 780.43  | 771.5   |
| Ung    | NM_001040691.1 | 36.66   | 33.02   | 32.64   | 30.41   |
| Uty    | NM_009484.2    | 243.55  | 284.64  | 247.79  | 239.07  |
| Vamp7  | NM_011515.4    | 1132.25 | 1198.68 | 1168.01 | 1105.45 |
| Vav1   | NM_011691.4    | 75.25   | 91.33   | 88.14   | 102.05  |
| Vegfa  | NM_001025250.3 | 450.09  | 427.13  | 361.55  | 397.23  |
| Vim    | NM_011701.4    | 397.74  | 803.04  | 512.89  | 955.62  |
| Vps4a  | NM_126165.1    | 870.26  | 889.94  | 869.14  | 896.47  |
| Vps4b  | NM_009190.2    | 237.47  | 238.21  | 237.35  | 237.72  |
| Was    | NM_009515.2    | 20.59   | 20.82   | 19.68   | 26.29   |
| Wdr5   | NM_080848.2    | 147.1   | 147.92  | 149.38  | 136.98  |
| Xcl1   | NM_008510.1    | 12.5    | 15.94   | 18.09   | 16.63   |
| Xiap   | NM_009688.2    | 1952.93 | 2017.95 | 1872.62 | 1812.19 |
| Xrcc6  | NM_010247.2    | 156.17  | 159.73  | 156.13  | 142.89  |
| Zbp1   | NM_021394.2    | 12.24   | 11.43   | 15.62   | 21.7    |
| Zfp367 | NM_175494.4    | 280.76  | 312.77  | 310.17  | 306.06  |
